# Supplementary material for: Divergent Syntheses of (-)-Chicanine, (+)-Fragransin A2, (+)-Galbelgin, (+)-Talaumidin, and (+)-Galbacin via One-Pot Homologative γ-Butyrolactonization
Source: MDPI journal article supplement (doi:10.3390/molecules29030701), 2024-02-02
Supplement: s1 [file s1]

## Supplementary Material

# Divergent Syntheses of (–)-Chicanine, (+)-Fragransin A<sub>2</sub>, (+)-Galbelgin, (+)-Talaumidin, and (+)-Galbacin via a One-Pot Homologative $\gamma$ -Butyrolactonization

Hosam Choi †, Jongyeol Han †, Joohee Choi and Kiyoun Lee \*

Department of Chemistry, The Catholic University of Korea, Bucheon 14662, Korea

† These authors contributed equally to this work.

\* Correspondence: kiyoun@catholic.ac.kr; Tel.: +82-2-2164-5528; Fax: +82-2-2164-4764

### Table of Contents

|                                                                                                                                                       |       |
|-------------------------------------------------------------------------------------------------------------------------------------------------------|-------|
| 1. <b>Figure S1.</b> Chromatographs of racemic and synthetic (–)- <b>8</b> .....                                                                      | S2    |
| 2. <b>Figure S2.</b> Chromatographs of racemic and synthetic (–)- <b>9</b> .....                                                                      | S3    |
| 3. <b>Table S1.</b> Optimization of the One-Carbon Homologative $\gamma$ -Butyrolactonization .....                                                   | S4    |
| 4. Alternative synthetic methods for <b>18A</b> , (+)- <i>talaumidin</i> ( <b>4</b> ) and (+)- <i>galbacin</i> ( <b>5</b> ) .....                     | S5–7  |
| <b>Scheme 1.</b> Alternative synthetic method for <b>18A</b> .....                                                                                    | S5    |
| <b>Scheme 2.</b> Alternative synthetic methods for (+)- <i>talaumidin</i> ( <b>4</b> ) and (+)- <i>galbacin</i> ( <b>5</b> ) .....                    | S6    |
| 5. <sup>1</sup> H and <sup>13</sup> C NMR spectra of <b>1–9</b> , <b>9A</b> , <b>11–13</b> , <b>15–17</b> , <b>18A</b> , <b>19</b> , <b>19A</b> ..... | S8–75 |
| 6. Reference .....                                                                                                                                    | S76   |

## 1. Chromatographs of racemic and synthetic (–)-**8**

(a) racemic

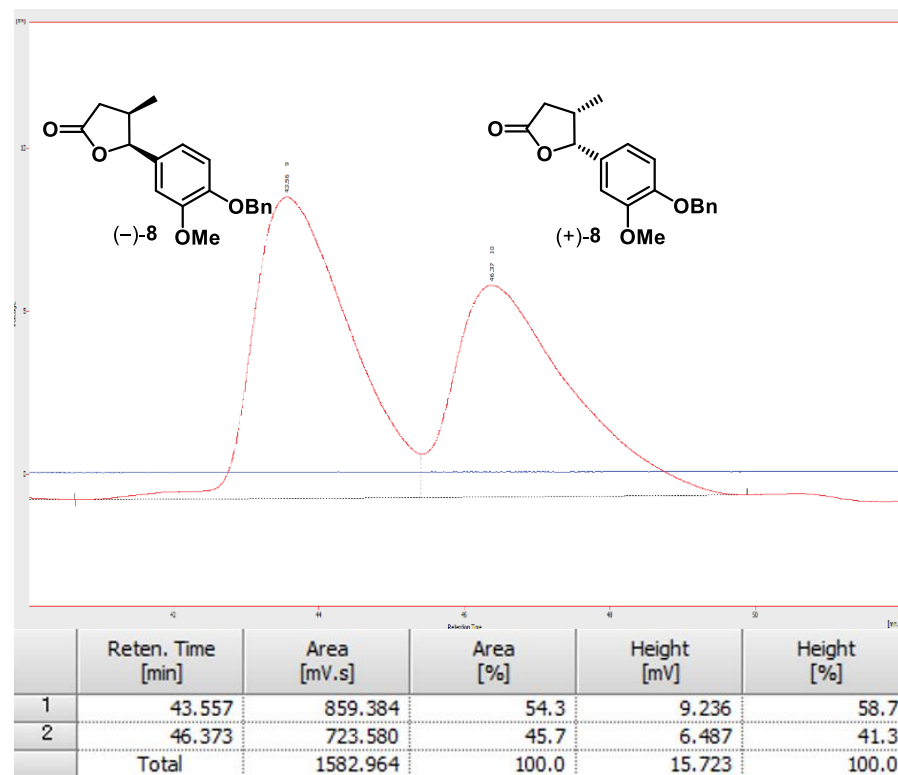

(b) synthetic (–)-**8**

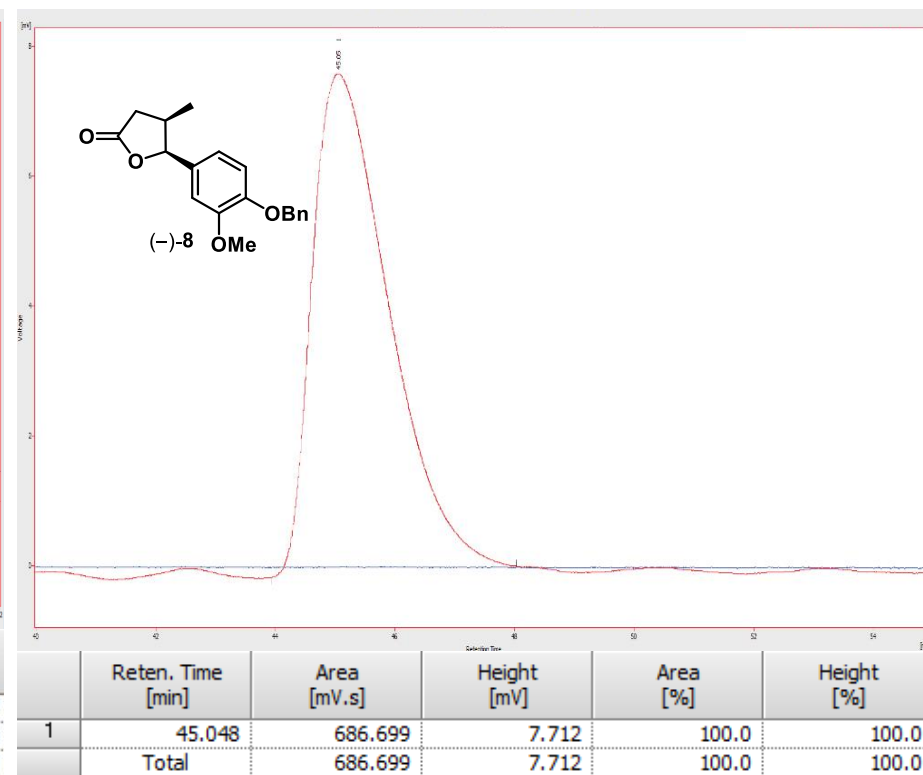

**Figure S1.** Chiral HPLC (Analytical DaiCel ChiralCel OD column (4.6 x 250 mm), flow rate: 1.0 mL/min, isocratic 10% *i*-PrOH–Hexane). For (–)-**8** ( $t_R$ : 43.6 min,  $[\alpha]_D^{25}$  –28.0 (c 1.28, CHCl<sub>3</sub>)) and *ent*-(+)-**8** ( $t_R$ : 46.4 min).

## 2. Chromatographs of racemic and synthetic (–)-9

(a) racemic

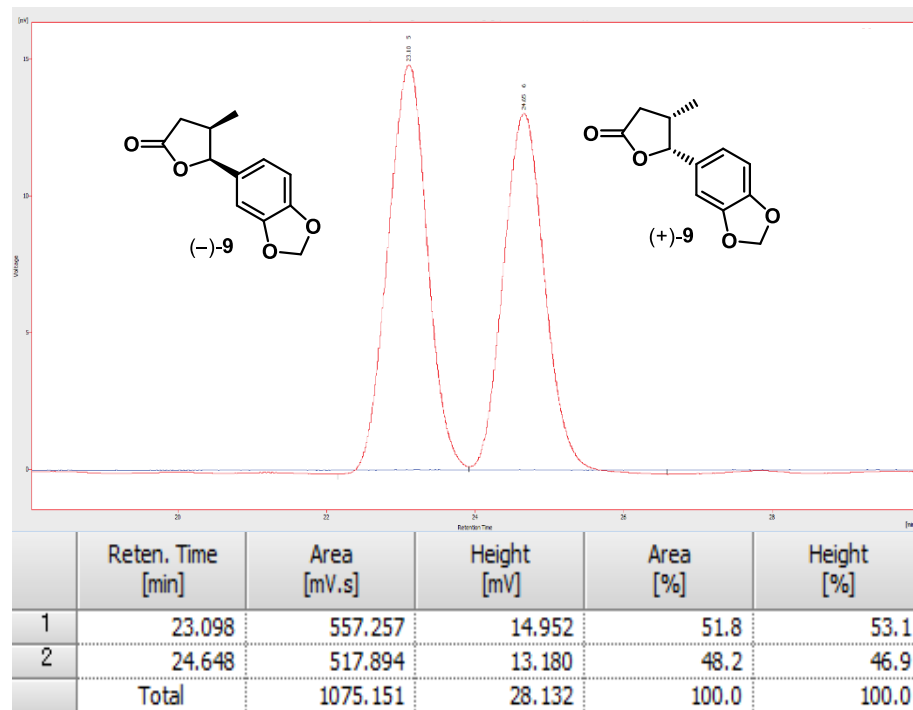

(b) synthetic (–)-9

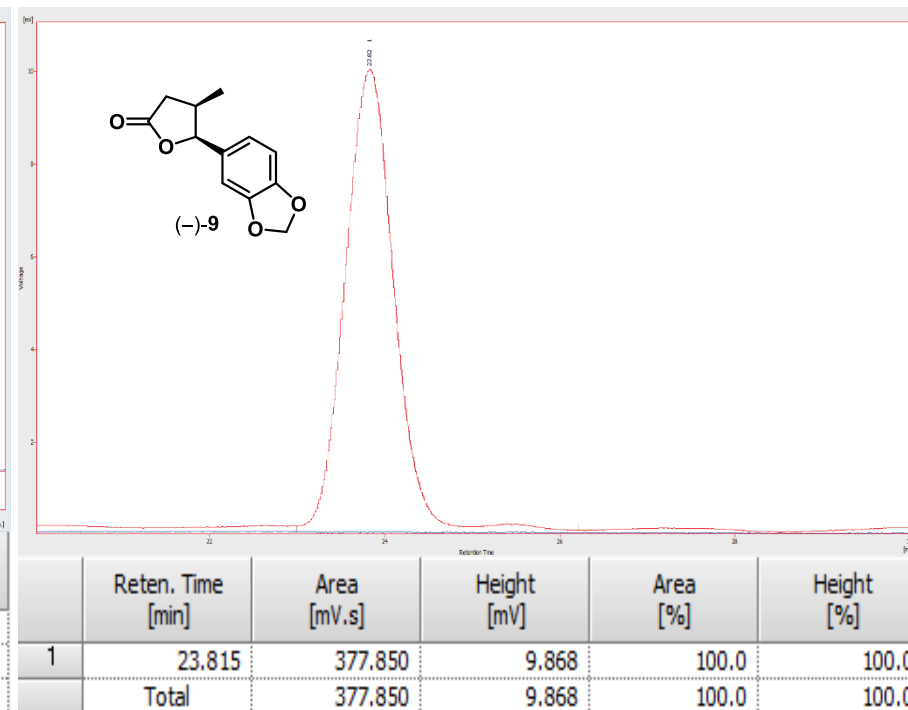

**Figure S2.** Chiral HPLC (Analytical DaiCel ChiralCel AD column (4.6 x 250 mm), flow rate: 1.0 mL/min, isocratic 5% *i*-PrOH–Hexane). For (–)-**9** ( $t_R$ : 23.1 min,  $[\alpha]_D^{25}$  –12.5 (c 0.4, CHCl<sub>3</sub>)) and *ent*-(+)-**9** ( $t_R$ : 24.6 min).

### 3. Optimization of the One-Carbon Homologative $\gamma$ -Butyrolactonization

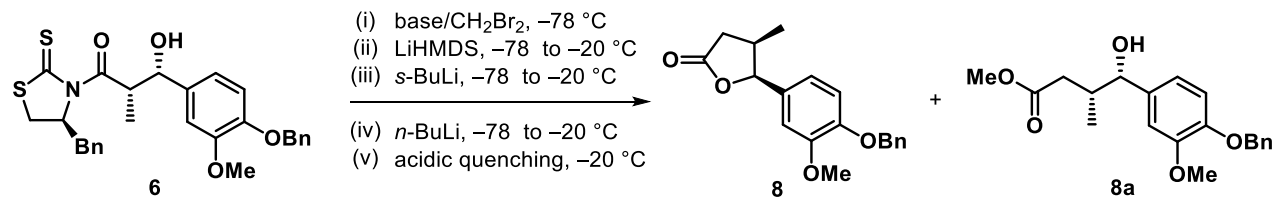

| entry    | conditions                         |                     |                              |                             |                  |                          | yield(%) <sup>a</sup> |           |
|----------|------------------------------------|---------------------|------------------------------|-----------------------------|------------------|--------------------------|-----------------------|-----------|
|          | (i) base/ $\text{CH}_2\text{Br}_2$ | (ii) LiHMDS (equiv) | (iii) <i>s</i> -BuLi (equiv) | (iv) <i>n</i> -BuLi (equiv) | (ii-iv) time (s) | (v) acidic quenching     | <b>8</b>              | <b>8a</b> |
| 1        | LiTMP                              | 4                   | -                            | 4                           | 90               | acidic MeOH              | trace                 |           |
| 2        | LiTMP                              | 4                   | 1                            | 4                           | 30               | acidic MeOH              | N.D. <sup>b</sup>     |           |
| 3        | LiTMP                              | 4                   | 1                            | 4                           | 90               | acidic MeOH              | 35                    | 17        |
| 4        | LiTMP                              | 4                   | 2                            | 4                           | 90               | acidic MeOH              | 42                    | 20        |
| 5        | LiTMP                              | 4                   | 4                            | 4                           | 90               | acidic MeOH              | 60                    | 35        |
| <b>6</b> | <b>LDA</b>                         | <b>4</b>            | <b>4</b>                     | <b>4</b>                    | <b>90</b>        | <b>HCl (3 equiv)/THF</b> | <b>91</b>             | <b>-</b>  |
| 7        | LDA                                | 2                   | 4                            | 4                           | 90               | HCl (3 equiv)/THF        | 39                    | -         |
| 8        | LiTMP                              | 4                   | 6                            | 4                           | 90               | acidic MeOH              | N.D. <sup>b</sup>     | -         |

(i) base/ $\text{CH}_2\text{Br}_2$ ,  $-78\text{ }^\circ\text{C}$  (ii) LiHMDS,  $-78$  to  $-20\text{ }^\circ\text{C}$ , (iii) *s*-BuLi,  $-78$  to  $-20\text{ }^\circ\text{C}$  (iv) *n*-BuLi,  $-78$  to  $25\text{ }^\circ\text{C}$ , (v) acidic workup,  $-20\text{ }^\circ\text{C}$ . <sup>a</sup> Isolated yield, <sup>b</sup> No product observed

**Table S1.** Optimization of the One-Carbon Homologative  $\gamma$ -Butyrolactonization



#### 4. Alternative synthetic methods for 18A, (+)-*talaumidin* (4) and (+)-*galbacin* (5)

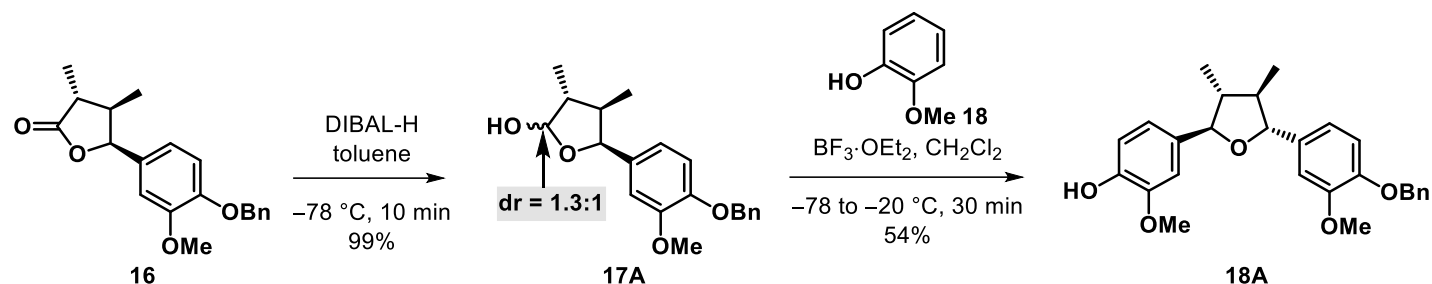

**Scheme 1.** Alternative synthetic method for **18A**

(3*R*,4*R*,5*S*)-5-(4-(benzyloxy)-3-methoxyphenyl)-3,4-dimethyltetrahydrofuran-2-ol (**17A**): To a cooled ( $-78\text{ }^{\circ}\text{C}$ ) solution of **16** (112 mg, 0.343 mmol) in toluene (3.4 mL, 0.1 M) was added DIBALH (0.38 mL, 1.0 M in toluene, 0.38 mmol, 1.1 equiv). After being stirred for 10 min at  $-78\text{ }^{\circ}\text{C}$ , the reaction mixture was quenched with MeOH (0.1 mL) followed by aqueous Rochelle's salt solution (10 mL) and diluted with  $\text{Et}_2\text{O}$  (10 mL). The resulting mixture was stirred for 6 h at  $25\text{ }^{\circ}\text{C}$ . The layers were separated, and the aqueous layer was extracted with  $\text{Et}_2\text{O}$  (10 mL $\times$ 3). The combined organic layers were washed with brine (15 mL $\times$ 1), dried over anhydrous  $\text{Na}_2\text{SO}_4$ , filtered, and concentrated in vacuo. The residue was purified by column chromatography ( $\text{SiO}_2$ , 50% EtOAc/hexane) to provide an 1.3:1 anomeric mixture of cyclic hemiketal **17A** (111 mg, 99%) as colorless oil: **For major diastereomer**:  $^1\text{H-NMR}$  (500 MHz,  $\text{CDCl}_3$ )  $\delta$  7.42–7.45 (m, 2H), 7.34–7.38 (m, 2H), 7.30 (d,  $J = 7.5$  Hz, 1H), 6.82 (d,  $J = 2.8$  Hz, 1H), 6.70 (d,  $J = 1.9$  Hz, 1H), 6.64 (dd,  $J = 8.3, 1.8$  Hz, 1H), 5.57 (d,  $J = 4.7$  Hz, 1H), 5.26 (d,  $J = 8.7$ , 1H), 5.13 (s, 2H), 3.87 (s, 3H), 2.30–2.39 (m, 1H), 1.75–1.87 (m, 1H), 1.03 (d,  $J = 6.8$  Hz, 3H), 0.57 (d,  $J = 7.0$  Hz, 3H); **For minor diastereomer**:  $^1\text{H-NMR}$  (500 MHz,  $\text{CDCl}_3$ )  $\delta$  7.42–7.45 (m, 2H), 7.34–7.38 (m, 2H), 7.29 (d,  $J = 7.1$  Hz, 1H), 7.06 (d,  $J = 1.7$  Hz, 1H), 6.84 (d,  $J = 2.8$  Hz, 1H), 6.80 (dd,  $J = 8.3, 1.8$  Hz, 1H), 5.19 (d,  $J = 5.8$  Hz, 1H), 5.14 (s, 2H), 5.09 (d,  $J = 7.8$ , 1H), 3.88 (s, 3H), 2.10–2.18 (m, 1H), 1.75–1.87 (m, 1H), 1.06 (d,  $J = 6.8$  Hz, 3H), 0.63 (d,  $J = 7.0$  Hz, 3H); **For 17A**:  $^{13}\text{C-NMR}$  (125 MHz,  $\text{CDCl}_3$ )  $\delta$  149.1, 147.1, 147.0, 137.2, 137.1, 133.6, 133.5, 128.4, 127.7, 127.6, 127.2, 118.9, 118.7, 113.4, 113.3, 110.8, 110.4, 105.1, 99.5, 84.2, 83.3, 70.9, 55.9, 55.8, 44.9, 44.1, 43.5, 40.9, 14.2, 14.1, 14.0, 11.5; HRMS (Q-TOF)  $m/z$ : 351.1574 [ $(\text{M}+\text{Na})^+$ ,  $\text{C}_{20}\text{H}_{24}\text{NaO}_4$  requires 351.1572].

4-((2*R*,3*R*,4*R*,5*R*)-5-(4-(benzyloxy)-3-methoxyphenyl)-3,4-dimethyltetrahydrofuran-2-yl)-2-methoxyphenol (**18A**): To a cooled ( $-78\text{ }^{\circ}\text{C}$ ) solution of **17A** (28 mg, 0.085 mmol) and 2-methoxyphenol **18** (53 mg, 0.43 mmol, 5 equiv) in  $\text{CH}_2\text{Cl}_2$  (1.1 mL, 0.08 M) was added  $\text{BF}_3\cdot\text{OEt}_2$  (63.0  $\mu\text{L}$ , 0.510 mmol, 6 equiv). After being stirred for 30 min at  $-20\text{ }^{\circ}\text{C}$ , the reaction mixture was quenched with the saturated aqueous  $\text{NaHCO}_3$  (5 mL) and diluted with  $\text{CH}_2\text{Cl}_2$  (5 mL). The layers were separated, and the aqueous layer was extracted with  $\text{CH}_2\text{Cl}_2$  (5 mL $\times$ 3). The combined organic layers were washed with brine (10 mL $\times$ 1), dried over anhydrous  $\text{Na}_2\text{SO}_4$ , filtered, and concentrated in vacuo. The residue was purified by column chromatography ( $\text{SiO}_2$ , 17% EtOAc/hexane) to provide **18A** (20.0 mg, 54%) as a white oil.

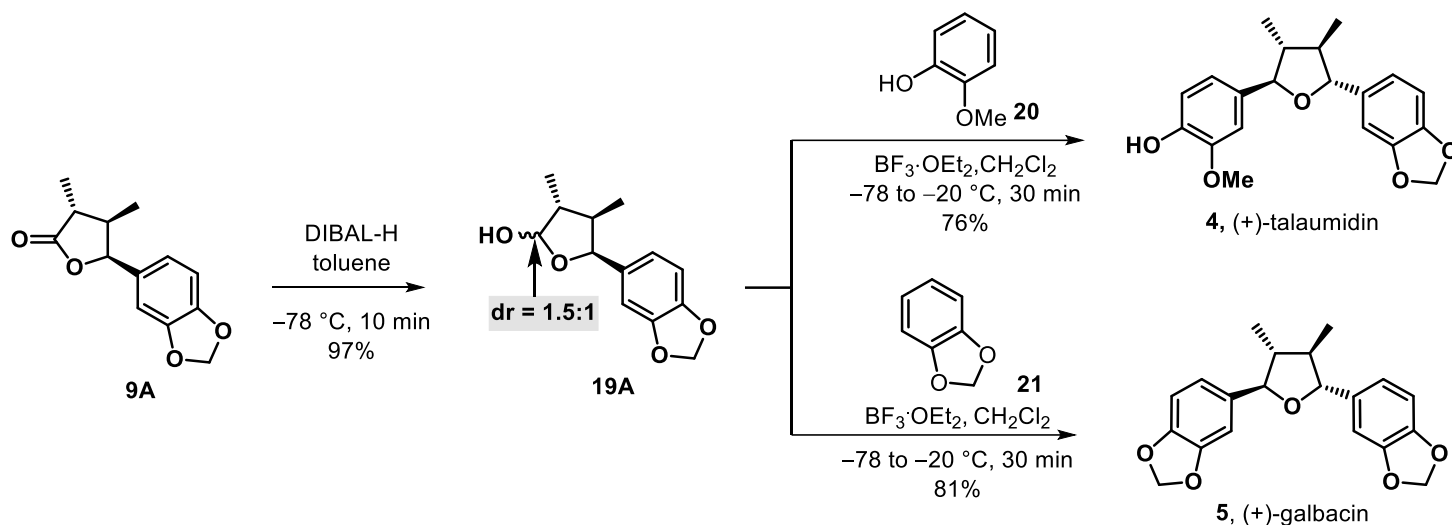

**Scheme 2.** Alternative synthetic methods for (+)-talaumidin (**4**) and (+)-galbacin (**5**)

(3*R*,4*R*,5*S*)-5-(benzo[*d*][1,3]dioxol-5-yl)-3,4-dimethyltetrahydrofuran-2-ol (**19A**): To a cooled (−78 °C) solution of **9A** (200 mg, 0.854 mmol) in toluene (8.5 mL, 0.1 M) was added DIBALH (0.94 mL, 1.0 M in toluene, 0.94 mmol, 1.1 equiv). After being stirred for 10 min at −78 °C, the reaction mixture was quenched with MeOH (0.1 mL) followed by aqueous Rochelle's salt solution (20 mL) and diluted with Et<sub>2</sub>O (20 mL). The resulting mixture was stirred for 6 h at 25 °C. The layers were separated, and the aqueous layer was extracted with Et<sub>2</sub>O (20 mL×3). The combined organic layers were washed with brine (40 mL×1), dried over anhydrous Na<sub>2</sub>SO<sub>4</sub>, filtered, and concentrated in vacuo. The residue was purified by column chromatography (SiO<sub>2</sub>, 50% EtOAc/hexane) to provide an 1.5:1 anomeric mixture of cyclic hemiketal **19A** (196 mg, 97%) as colorless oil: **For major diastereomer**: <sup>1</sup>H-NMR (500 MHz, CDCl<sub>3</sub>) δ 6.76 (d, *J* = 6.4 Hz, 1H), 6.66 (d, *J* = 1.4 Hz, 1H), 6.60–6.63 (m, 1H), 5.93 (s, 2H), 5.56 (d, *J* = 4.7 Hz, 1H), 5.24 (d, *J* = 8.7 Hz, 1H), 3.49 (br s, 1H), 2.29–2.38 (m, 1H), 1.73–1.86 (m, 1H), 1.02 (d, *J* = 6.8 Hz, 3H), 0.58 (d, *J* = 7.0 Hz, 3H); **For minor diastereomer**: <sup>1</sup>H-NMR (500 MHz, CDCl<sub>3</sub>) δ 6.95 (d, *J* = 1.3 Hz, 1H), 6.80 (dd, *J* = 8.0, 1.5 Hz, 1H), 6.75 (d, *J* = 7.9 Hz, 1H), 5.94 (s, 2H), 5.17 (d, *J* = 5.7 Hz, 1H), 5.07 (d, *J* = 7.8 Hz, 1H), 4.25 (br s, 1H), 2.08–2.17 (m, 1H), 1.73–1.86 (m, 1H), 1.05 (d, *J* = 6.8 Hz, 3H), 0.63 (d, *J* = 7.0 Hz, 3H); **For 19A**: <sup>13</sup>C-NMR (125 MHz, CDCl<sub>3</sub>) δ 147.38, 147.37, 146.6, 146.50, 134.5, 134.4, 120.0, 119.8, 107.7, 107.63, 107.61, 107.2, 105.2, 100.9, 100.8, 99.7, 84.2, 83.6, 45.2, 44.1, 43.6, 40.9, 14.4, 14.2, 14.1, 11.5; HRMS (Q–TOF) *m/z*: 259.0953 [(M+Na)<sup>+</sup>, C<sub>13</sub>H<sub>16</sub>NaO<sub>4</sub> requires 259.0946].

(+)-talaumidin (**4**): To a cooled (−78 °C) solution of **19A** (13 mg, 0.055 mmol) and 2-methoxyphenol **20** (34.1 mg, 0.275 mmol, 5 equiv) in CH<sub>2</sub>Cl<sub>2</sub> (0.7 mL, 0.08 M) was added BF<sub>3</sub>·OEt<sub>2</sub> (41 μL, 0.33 mmol, 6 equiv). After being stirred for 30 min at −20 °C, the reaction mixture was quenched with the saturated aqueous NaHCO<sub>3</sub> (5 mL)

and diluted with CH<sub>2</sub>Cl<sub>2</sub> (5 mL). The layers were separated, and the aqueous layer was extracted with CH<sub>2</sub>Cl<sub>2</sub> (5 mL×3). The combined organic layers were washed with brine (10 mL×1), dried over anhydrous Na<sub>2</sub>SO<sub>4</sub>, filtered, and concentrated in vacuo. The residue was purified by column chromatography (SiO<sub>2</sub>, 17% EtOAc/hexane) to provide natural (+)-talaumidin (**4**, 14.3 mg, 76%) as a colorless oil.

(+)-*galbacin* (**5**): To a cooled (−78 °C) solution of **19A** (14.6 mg, 61.8 μmol) and 1,2-methylenedioxybenzene **21** (37.7 mg, 0.310 mmol, 5 equiv) in CH<sub>2</sub>Cl<sub>2</sub> (0.8 mL, 0.08 M) was added BF<sub>3</sub>·OEt<sub>2</sub> (46 μL, 0.37 mmol, 6 equiv). After being stirred for 30 min at −20 °C, the reaction mixture was quenched with the saturated aqueous NaHCO<sub>3</sub> (5 mL) and diluted with CH<sub>2</sub>Cl<sub>2</sub> (5 mL). The layers were separated, and the aqueous layer was extracted with CH<sub>2</sub>Cl<sub>2</sub> (5 mL×3). The combined organic layers were washed with brine (10 mL×1), dried over anhydrous Na<sub>2</sub>SO<sub>4</sub>, filtered, and concentrated in vacuo. The residue was purified by column chromatography (SiO<sub>2</sub>, 50% CH<sub>2</sub>Cl<sub>2</sub>/hexane) to provide natural (+)-galbacin (**5**, 17 mg, 81%) as a colorless oil.

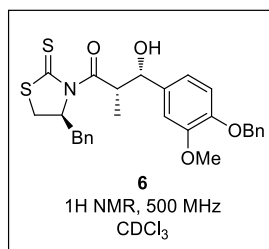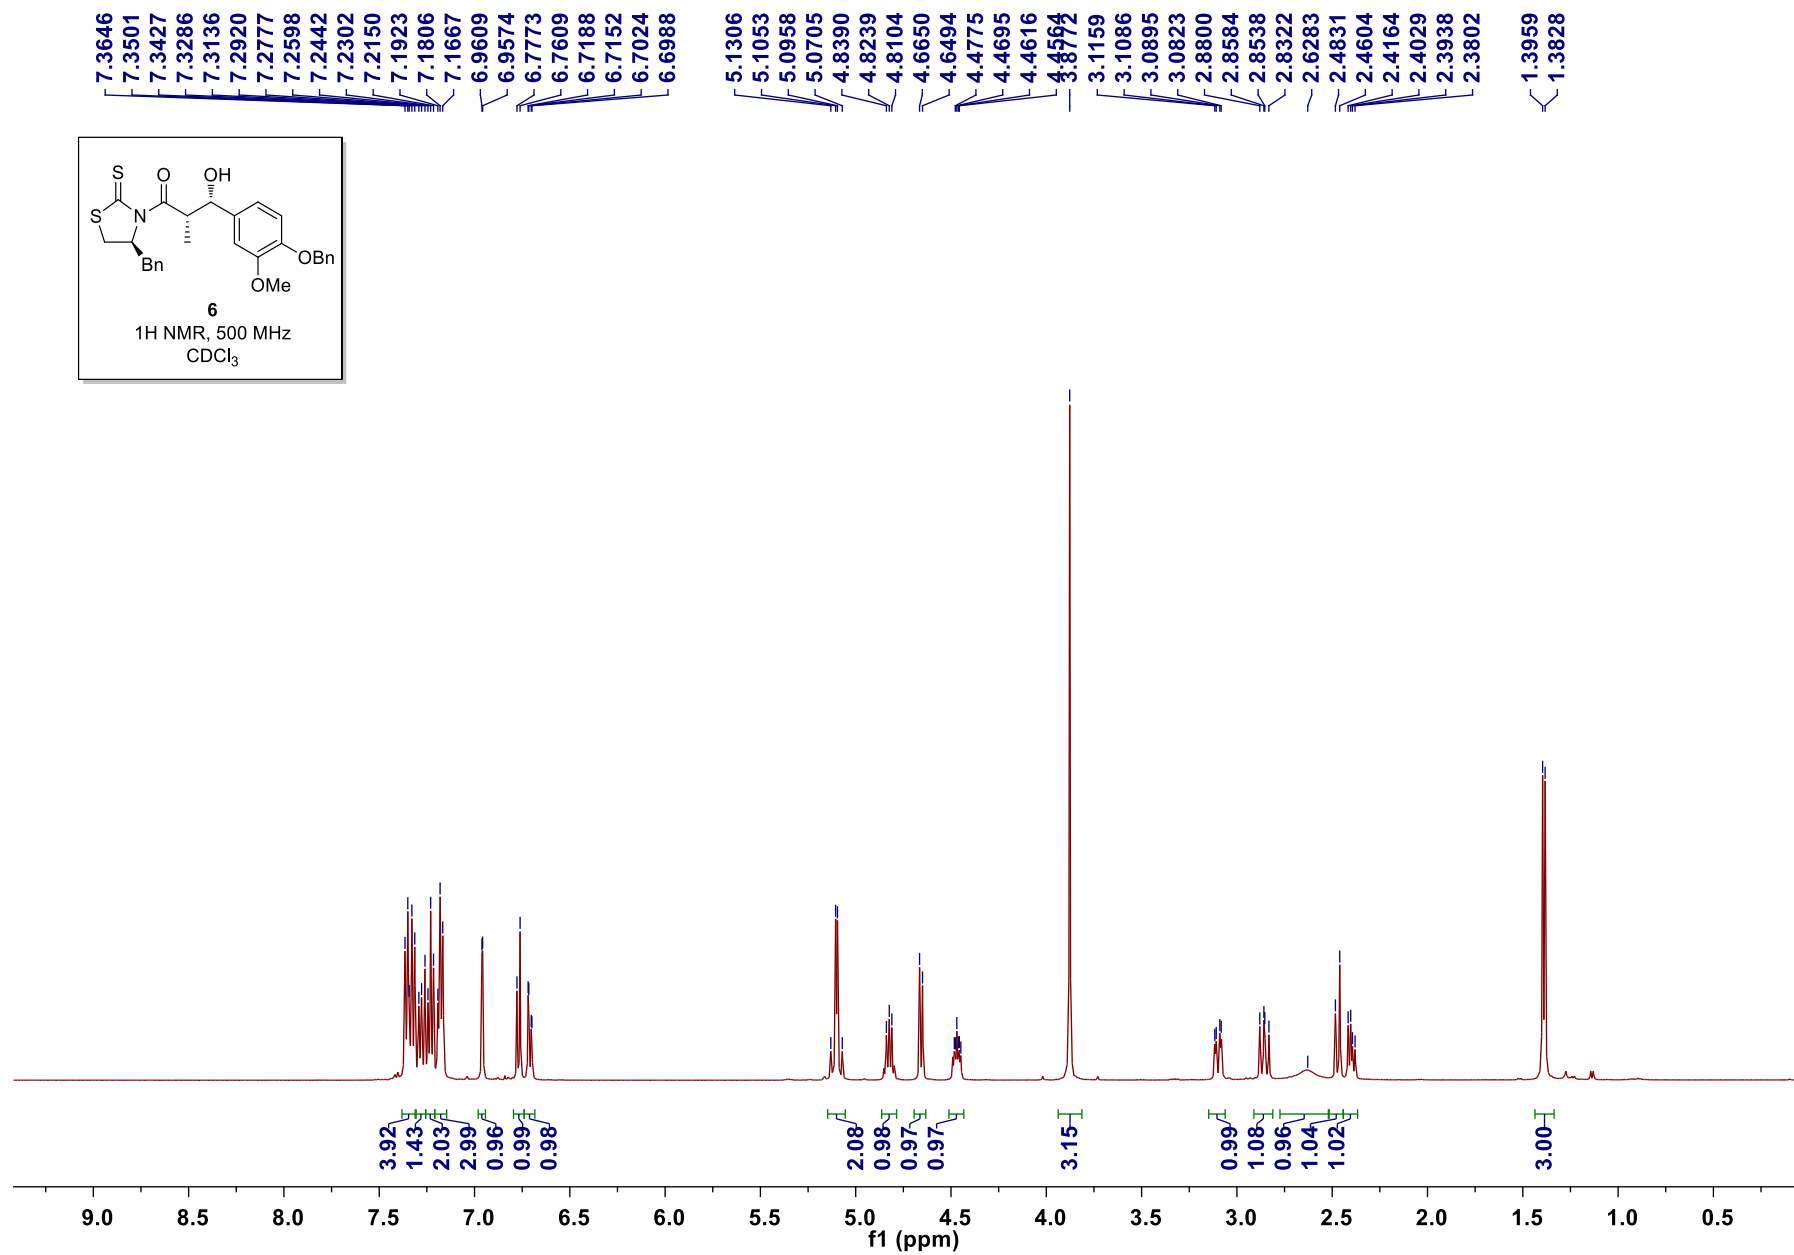

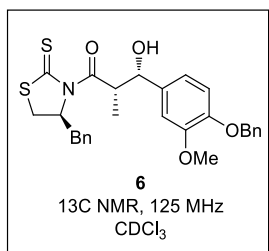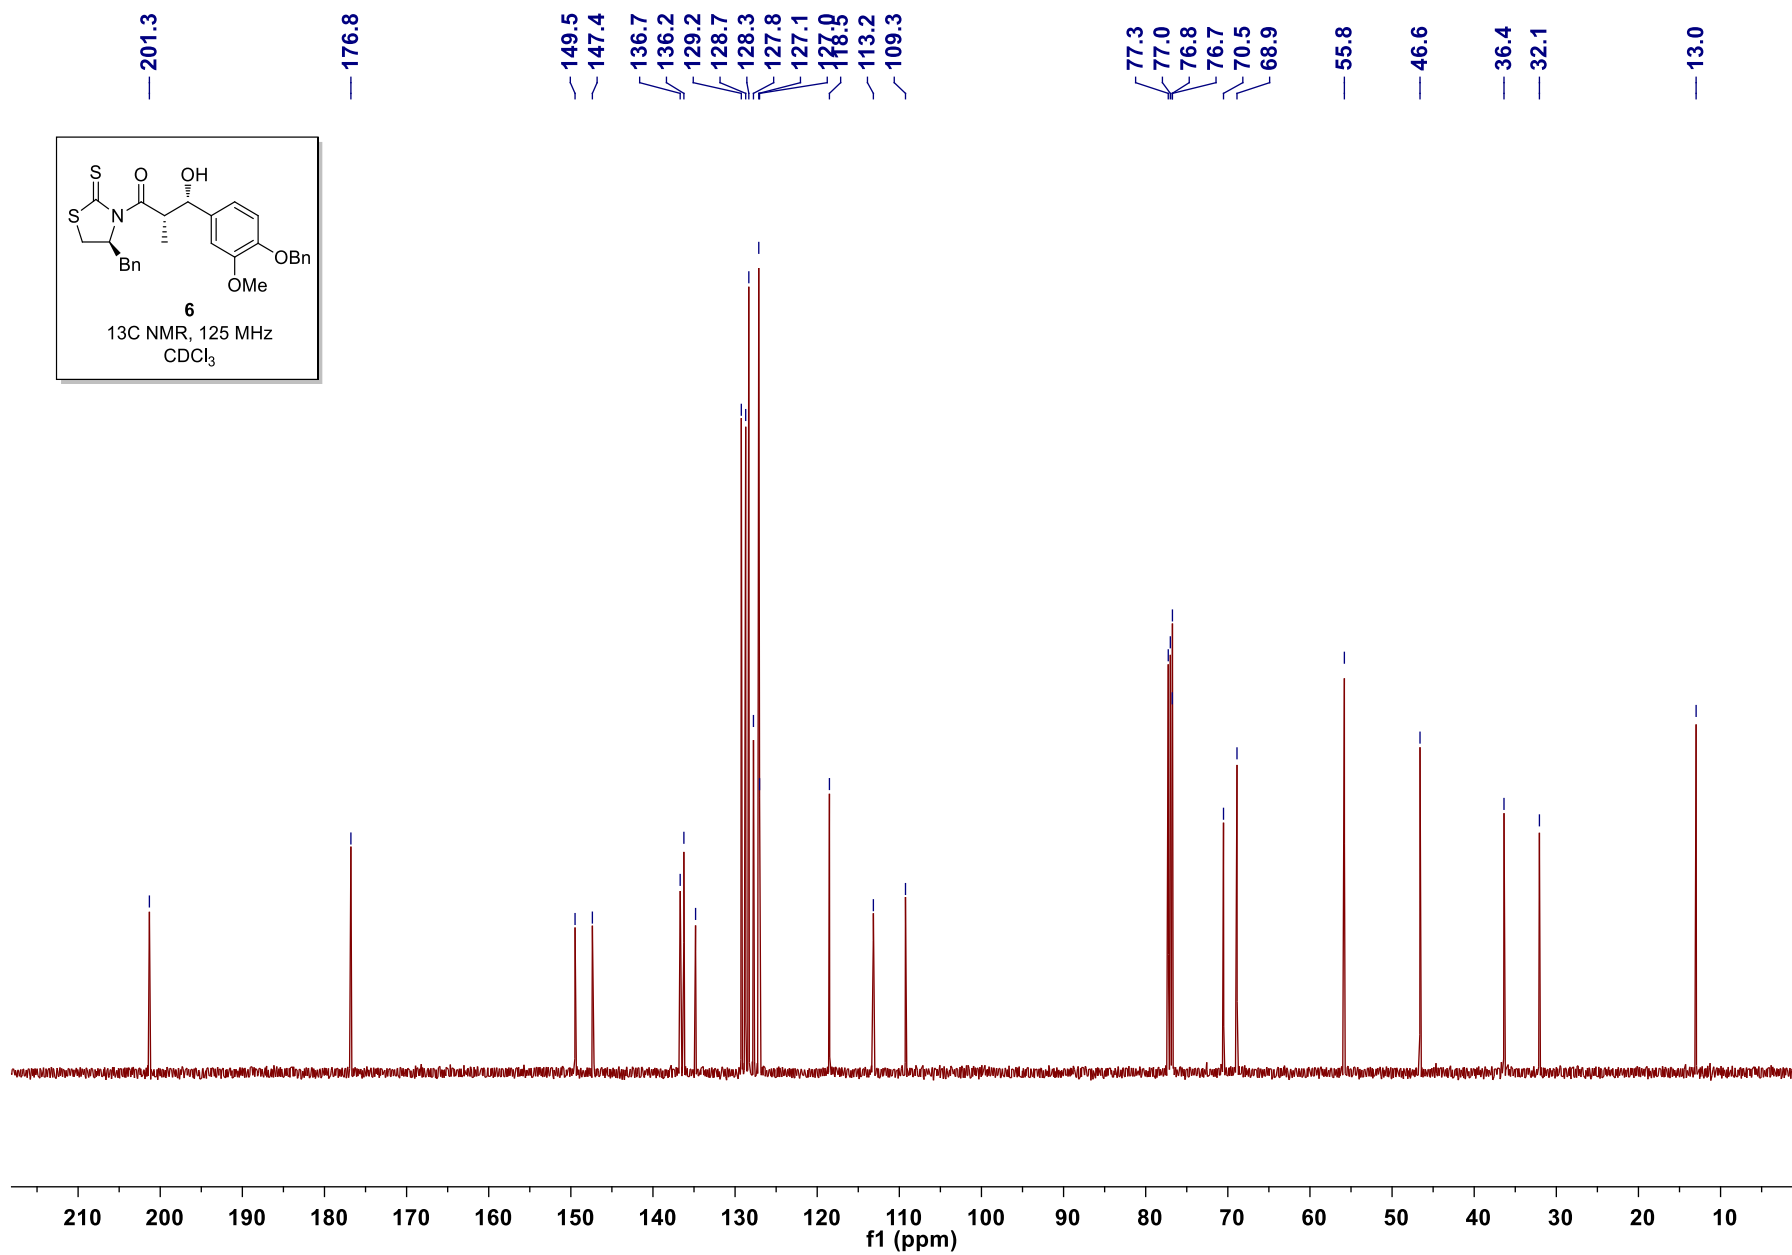

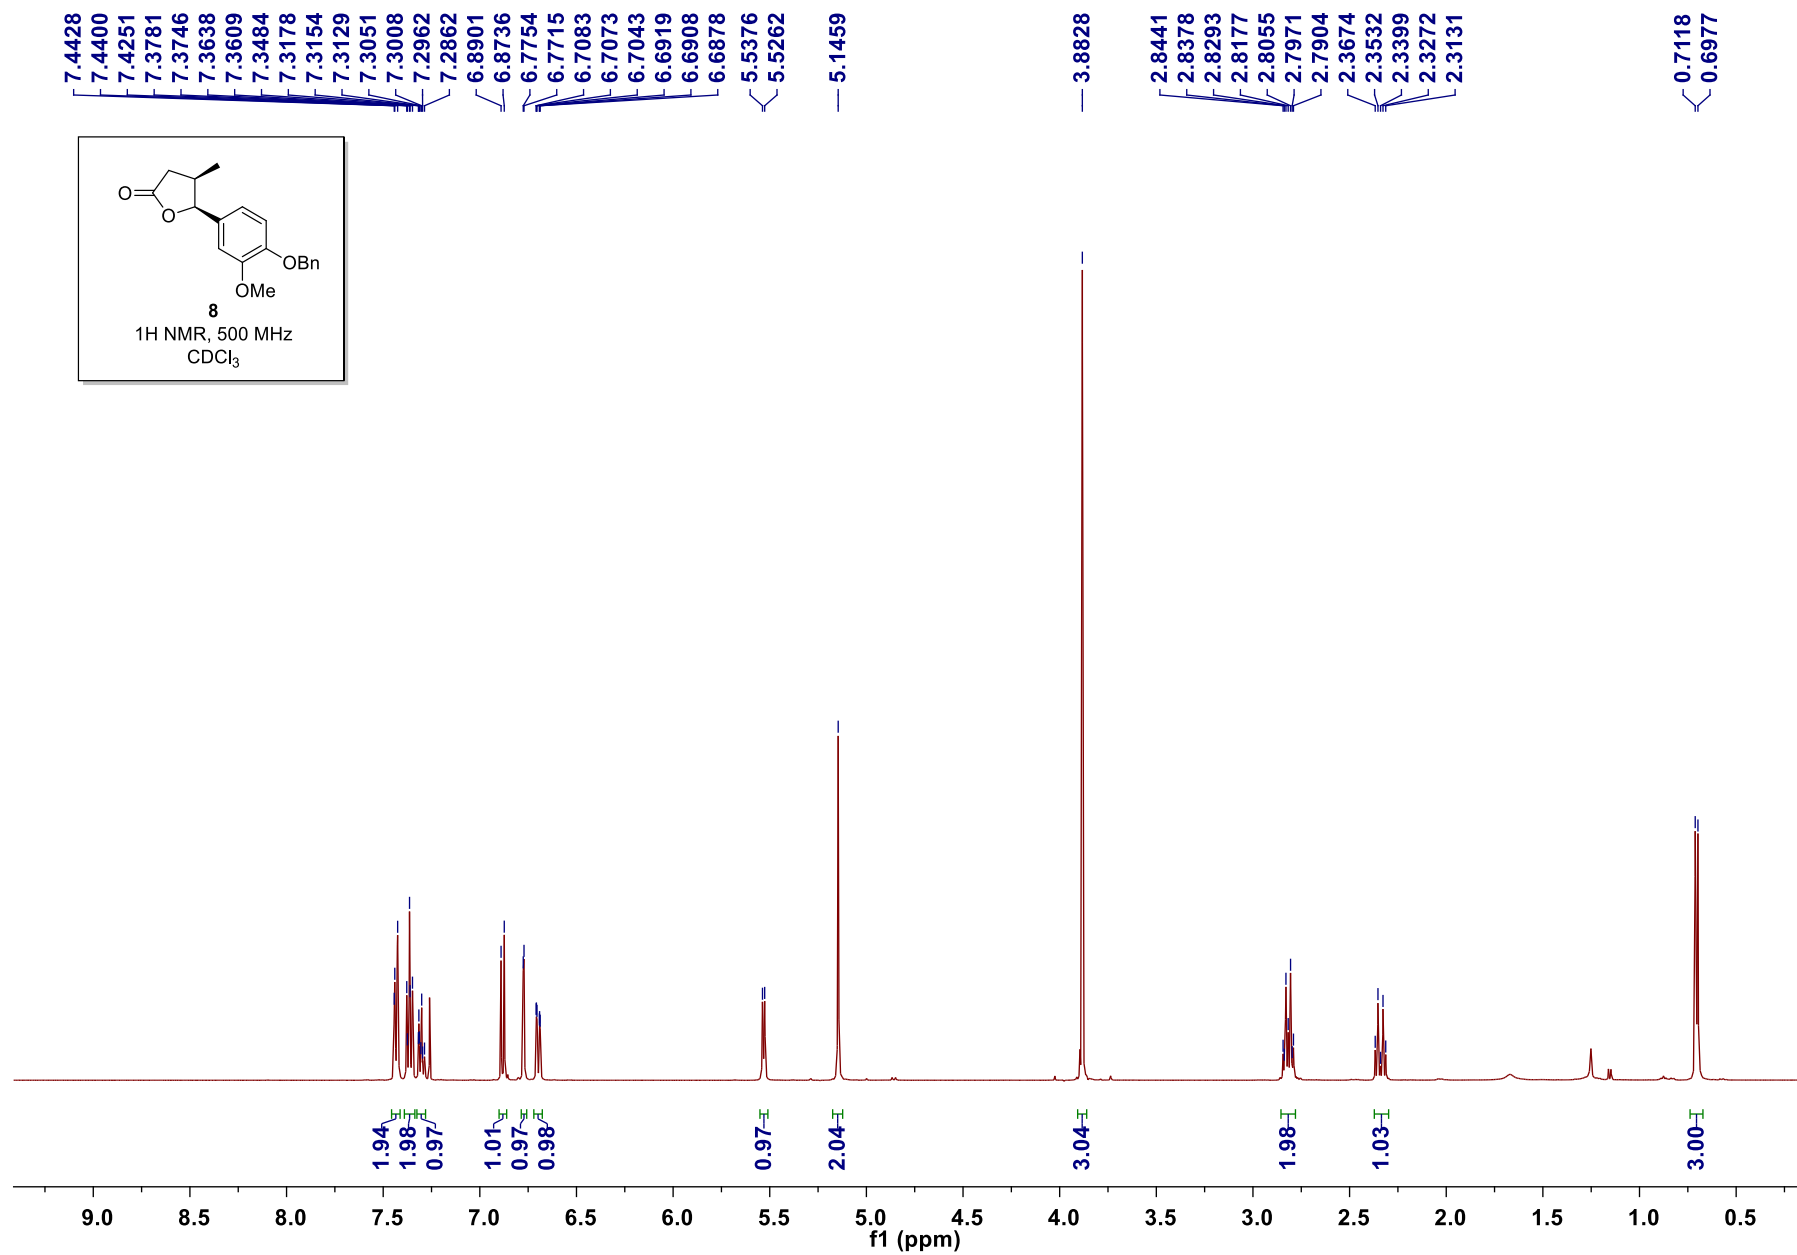

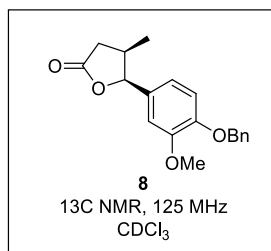

— 176.8

— 149.6

— 147.8

— 136.9

— 129.1

— 128.5

— 127.8

— 127.2

— 117.6

— 113.8

— 109.1

— 83.9

— 77.3

— 77.0

— 76.7

— 71.0

— 56.1

— 37.1

— 35.1

— 15.1

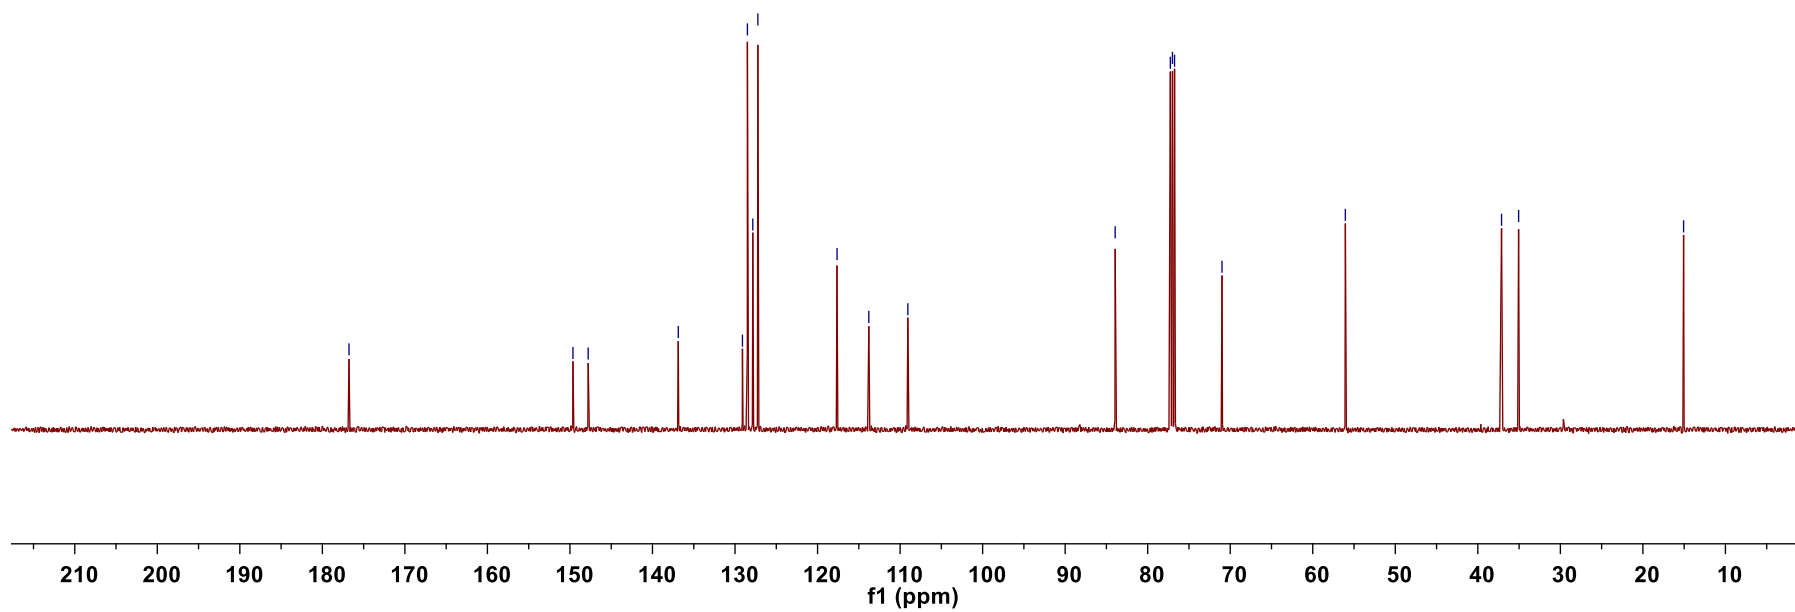

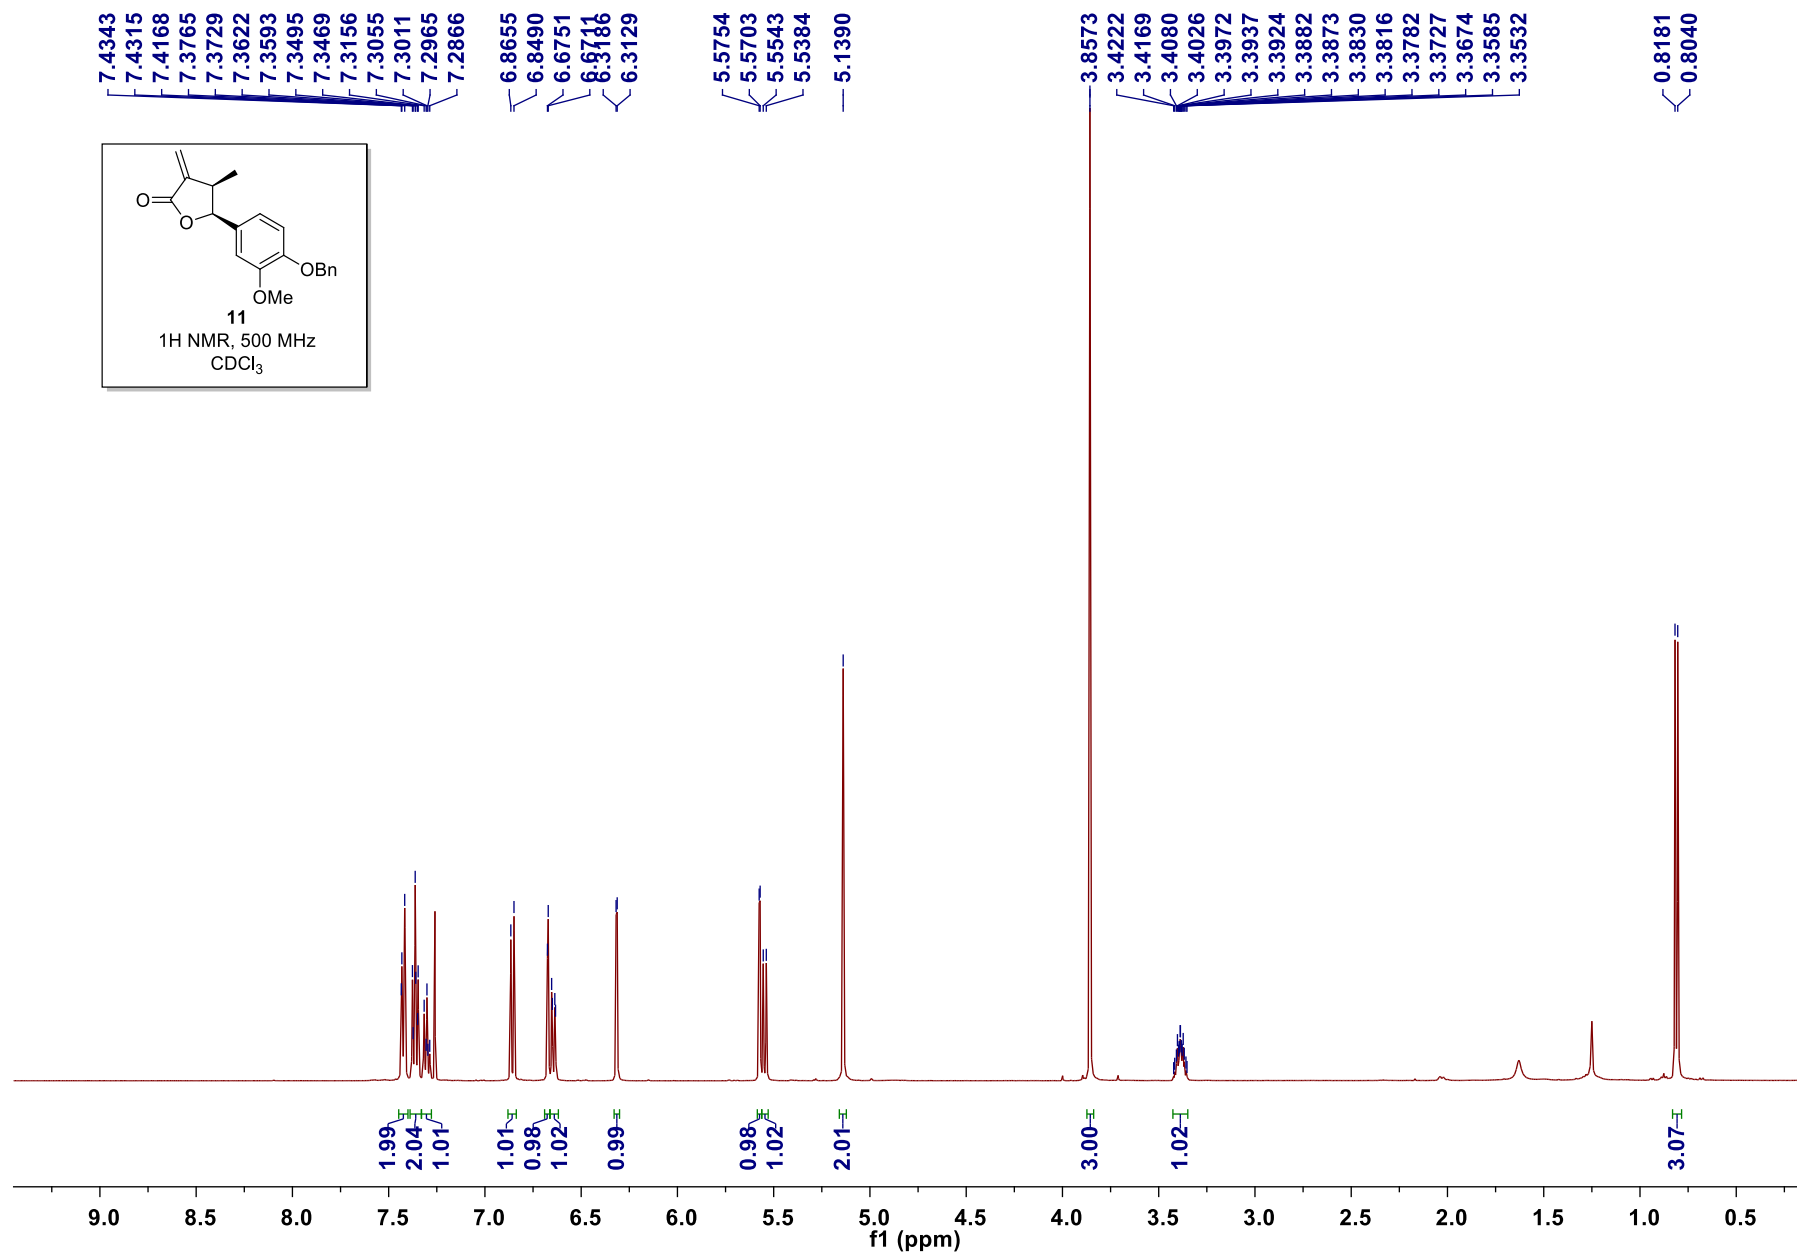



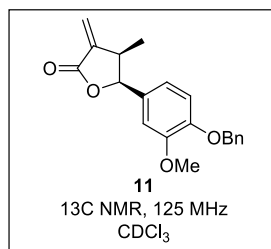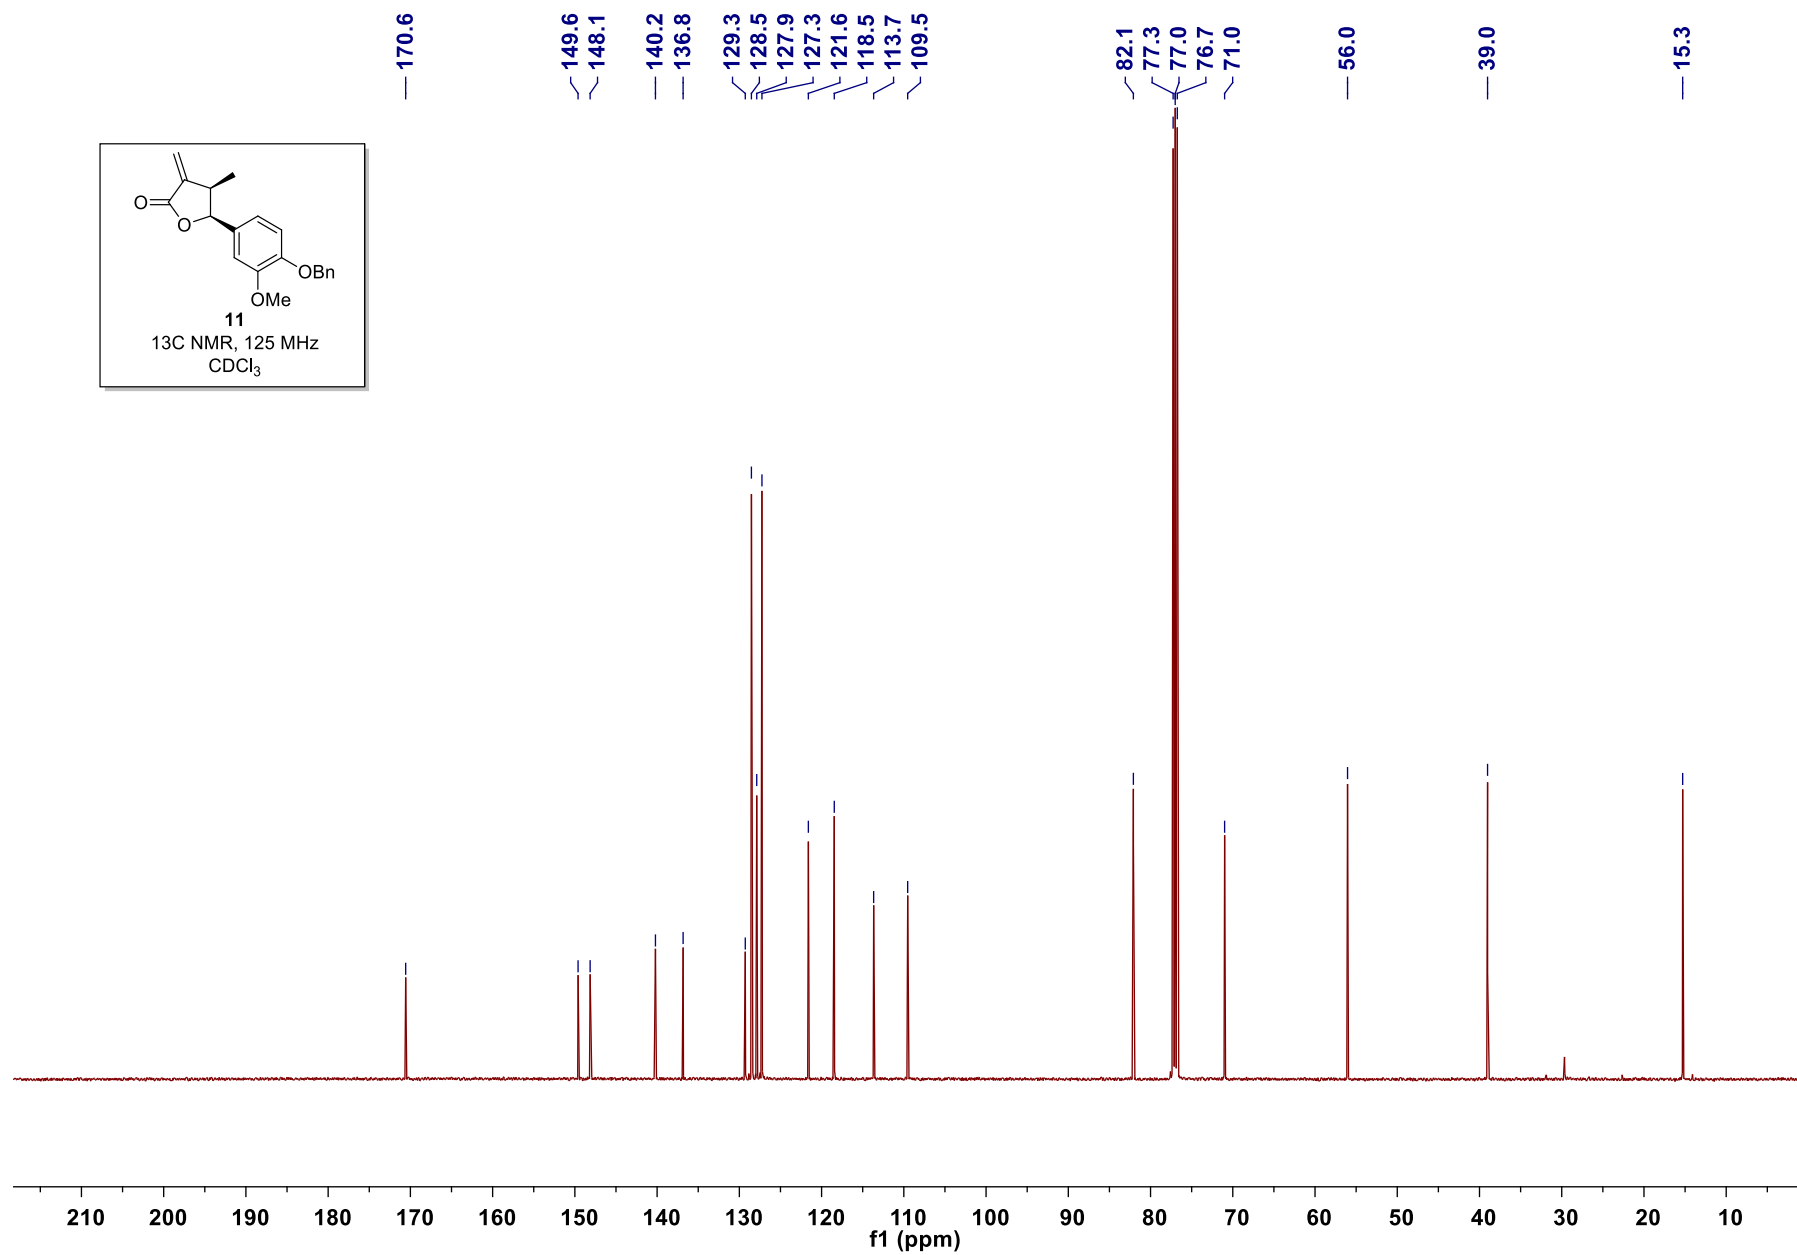

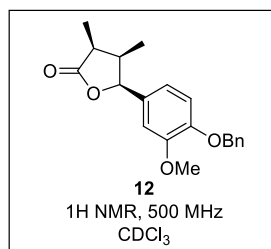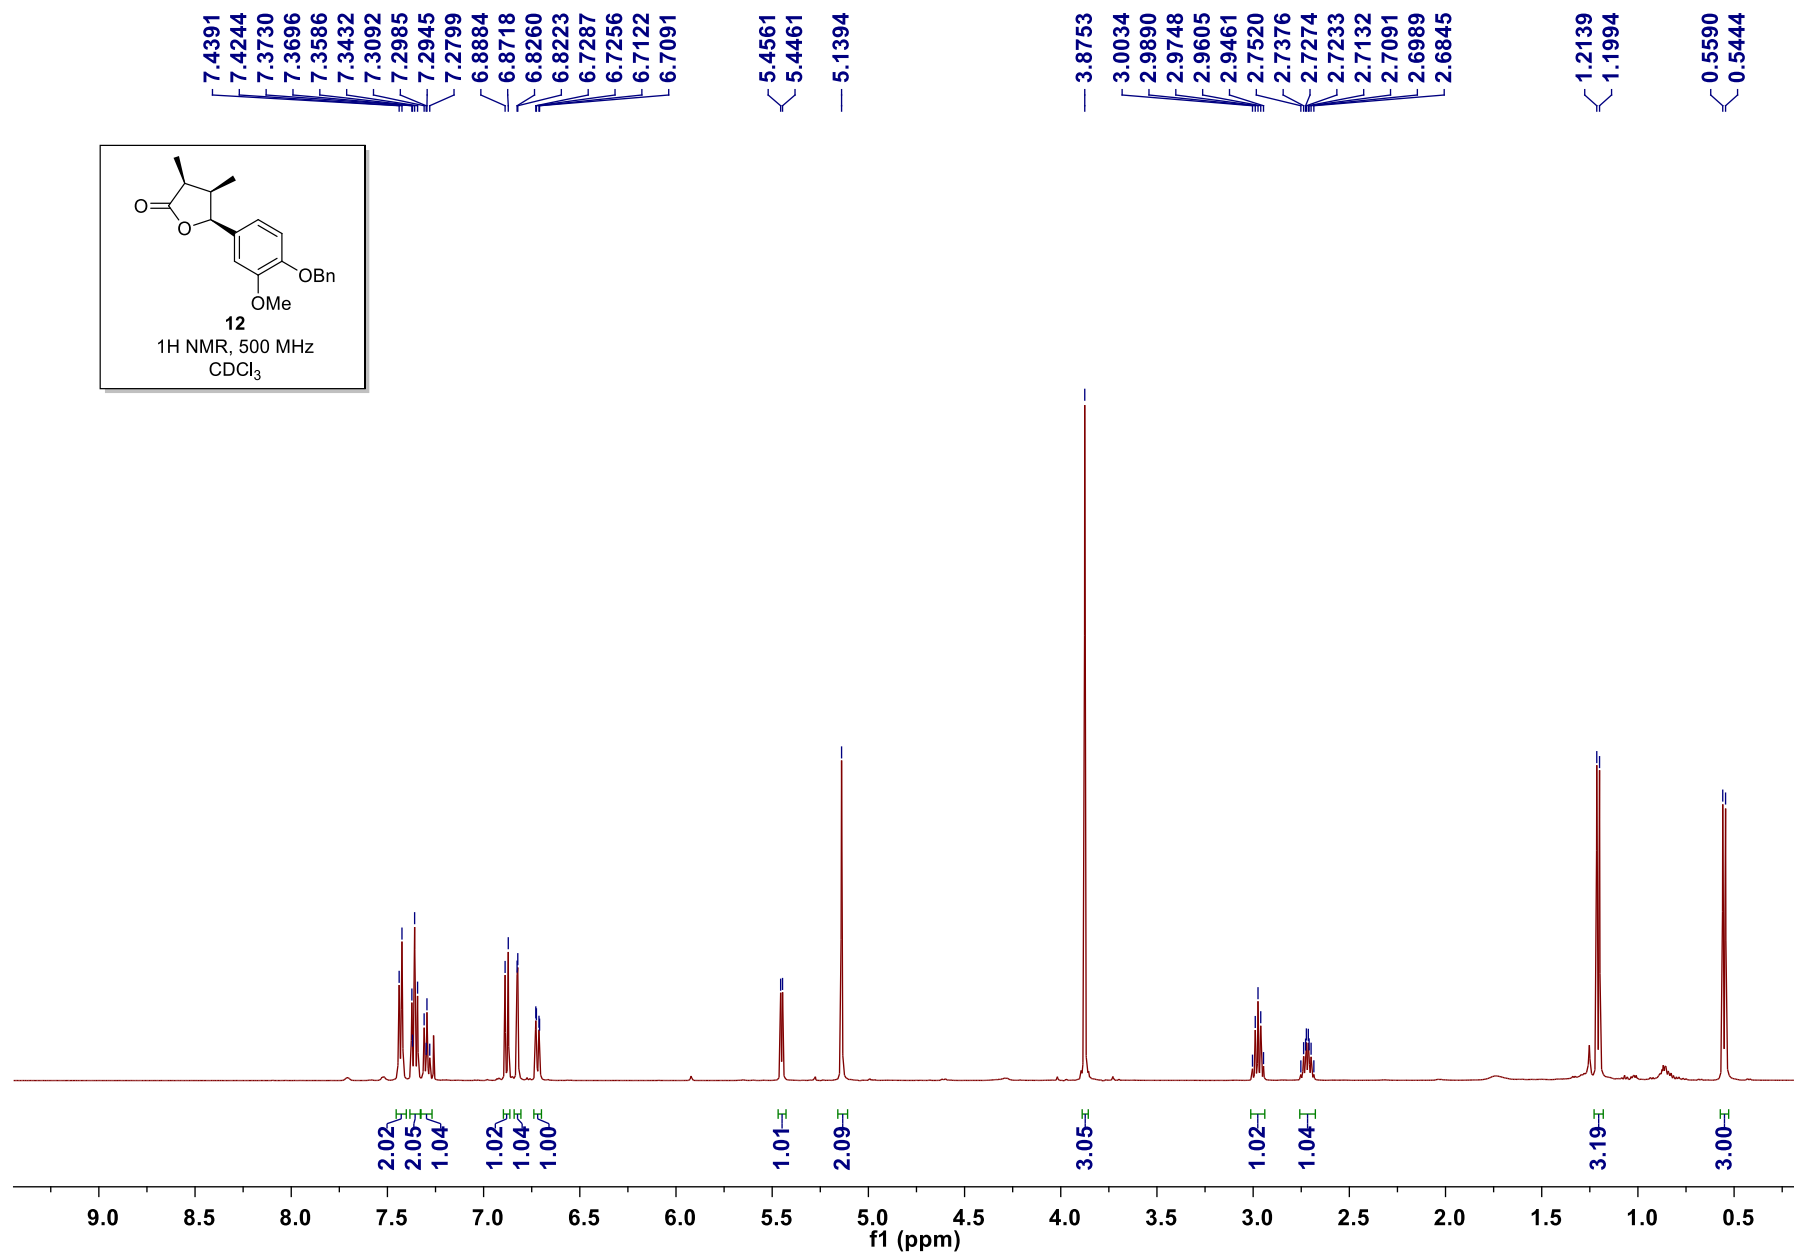

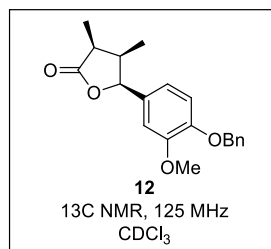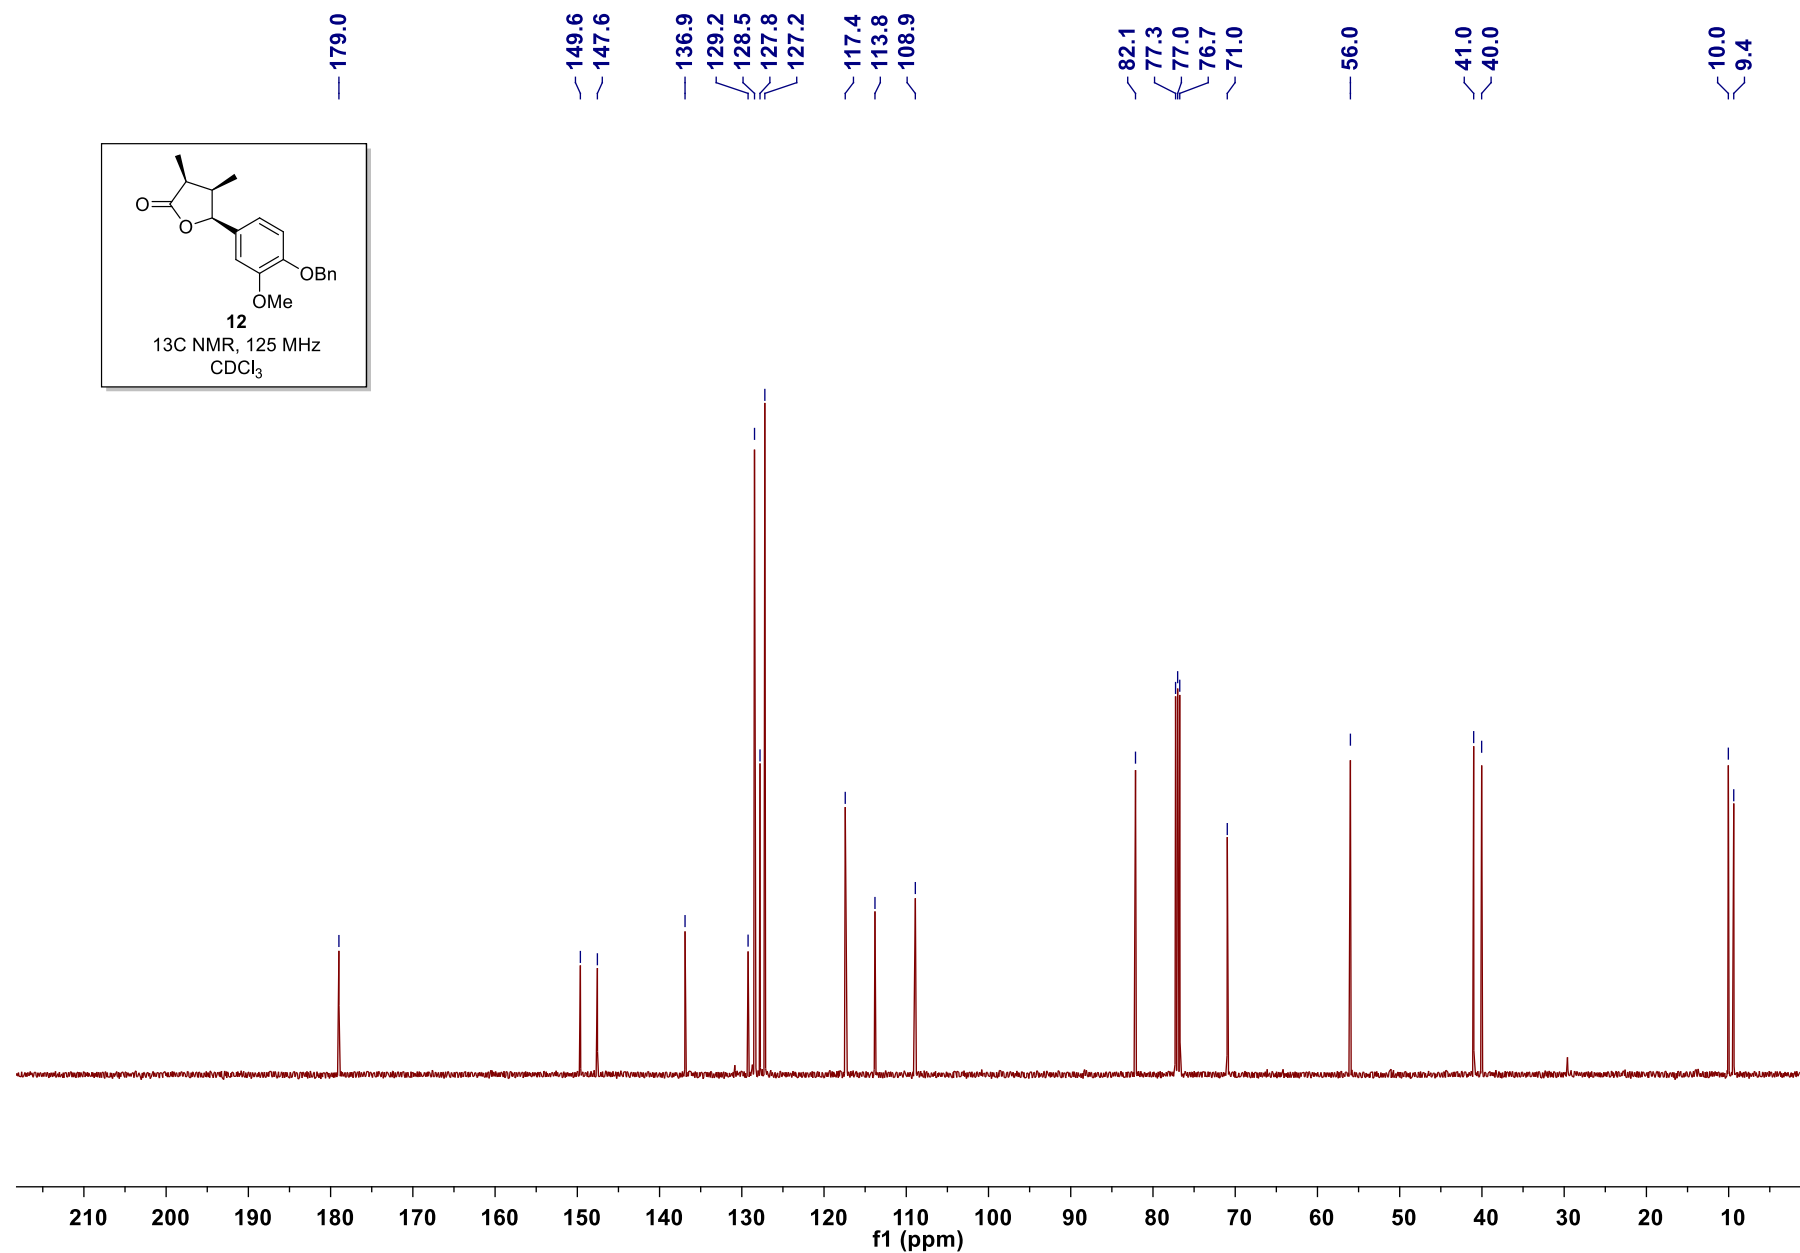

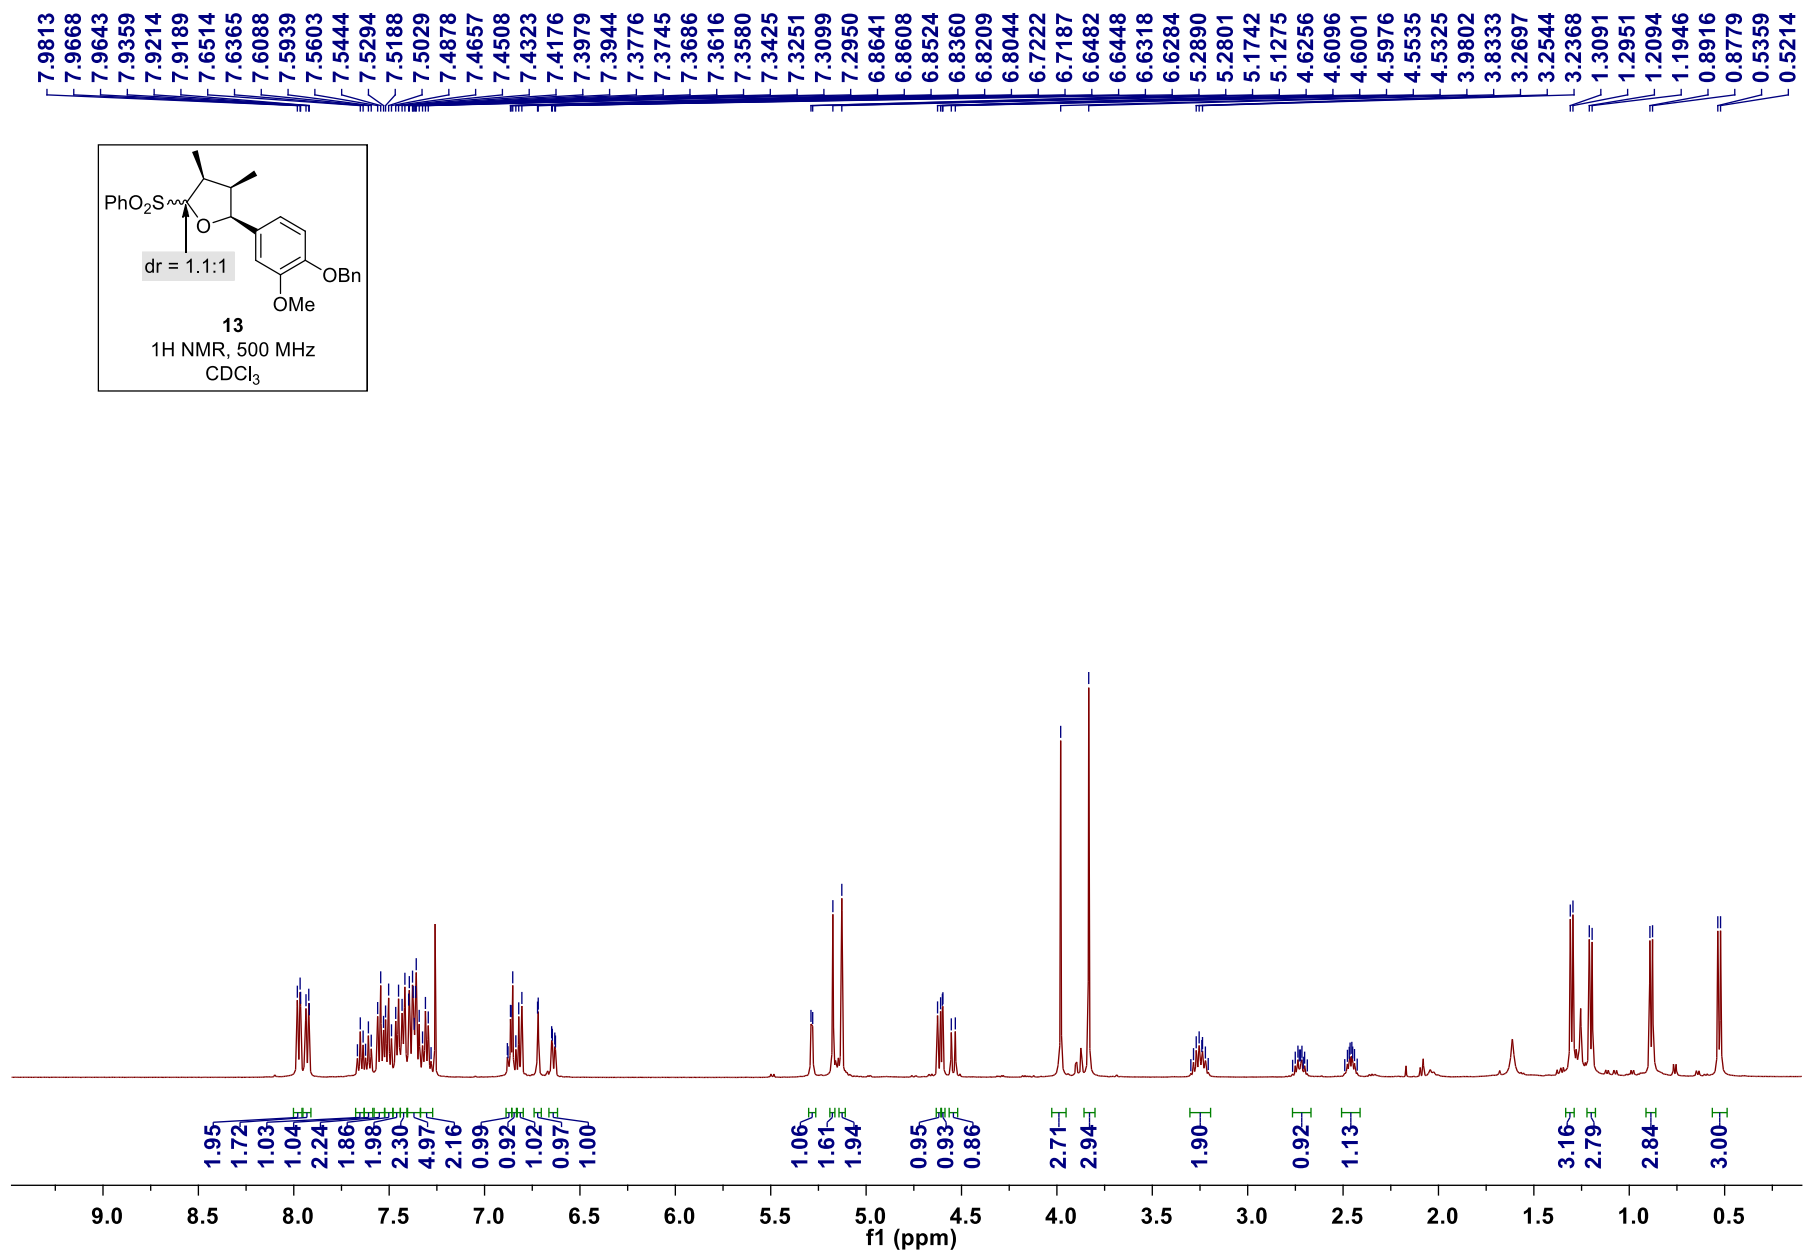

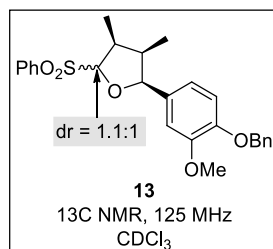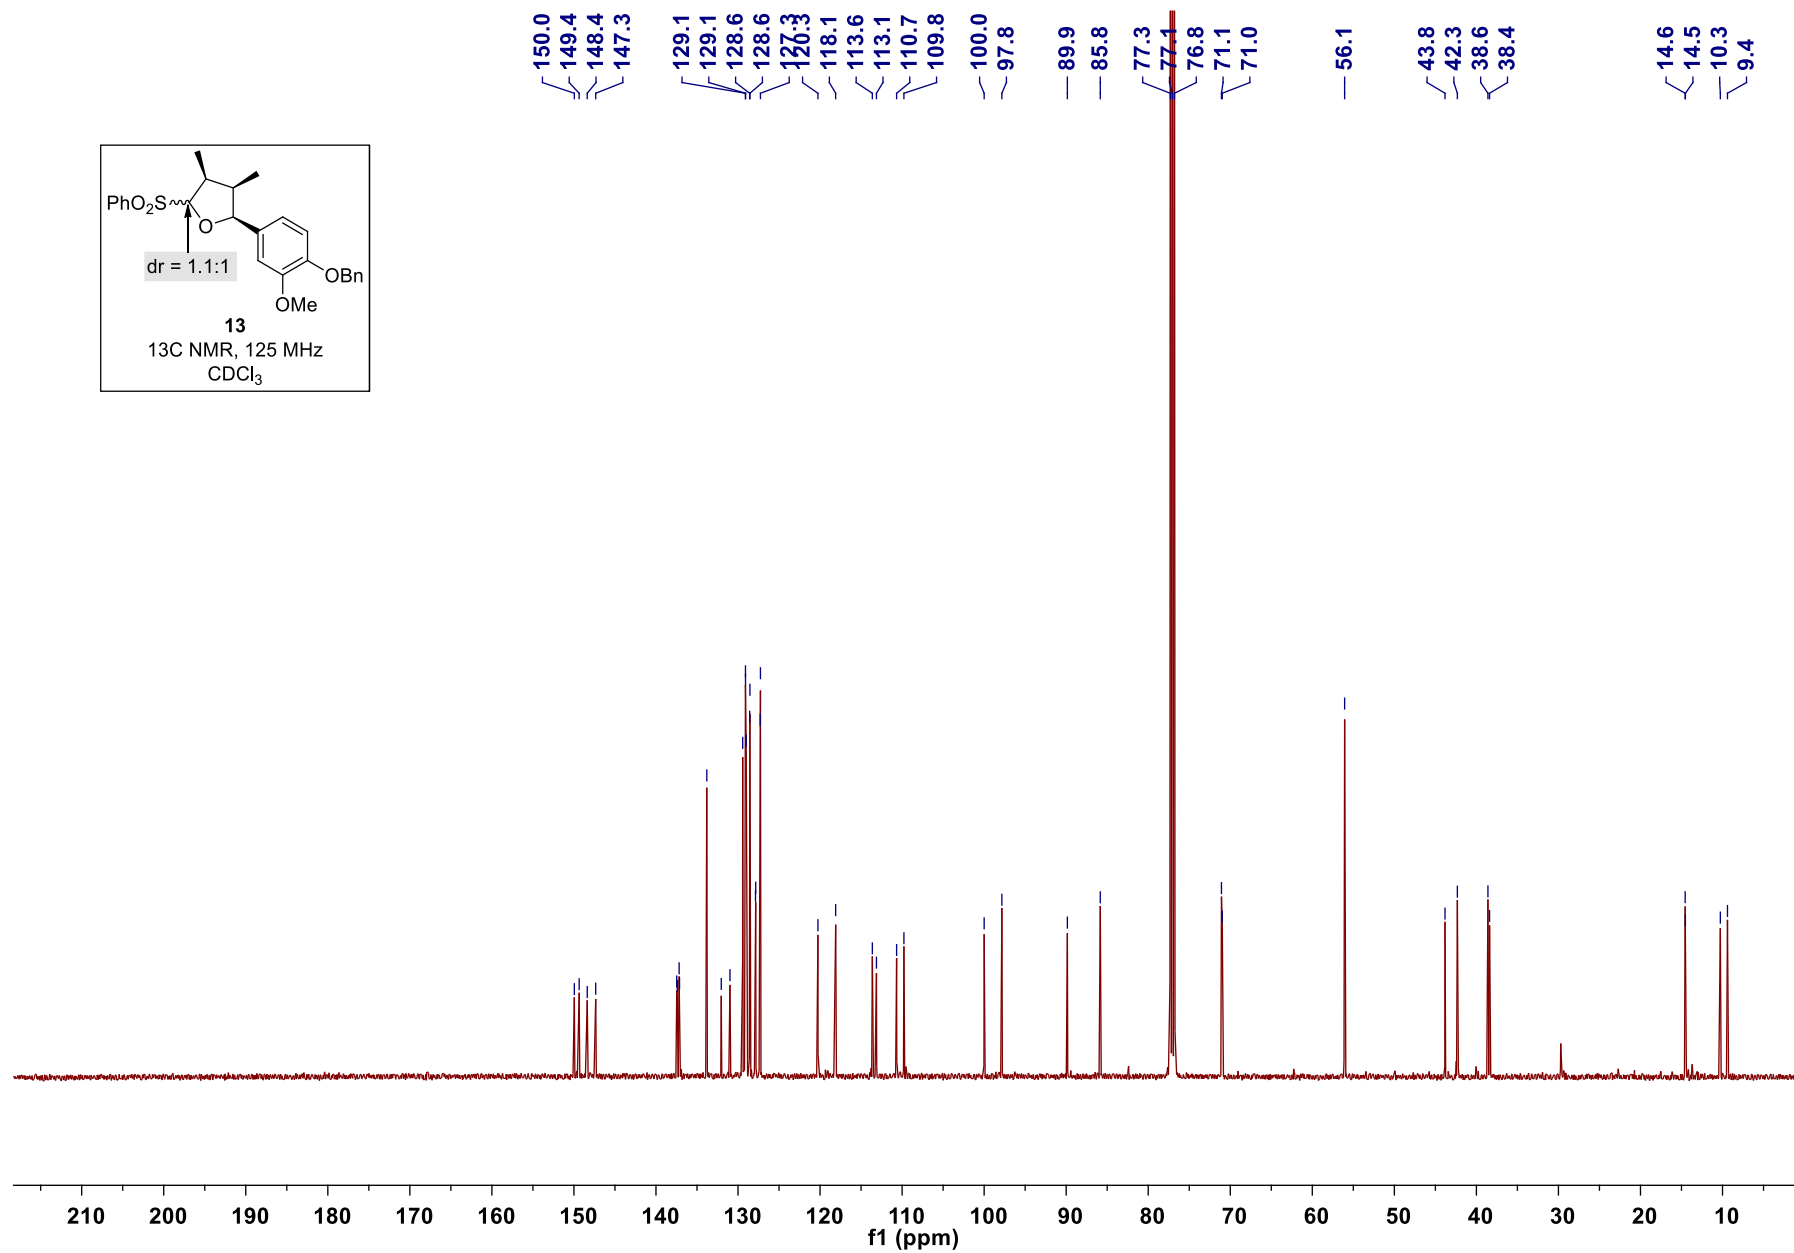

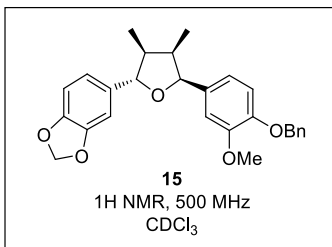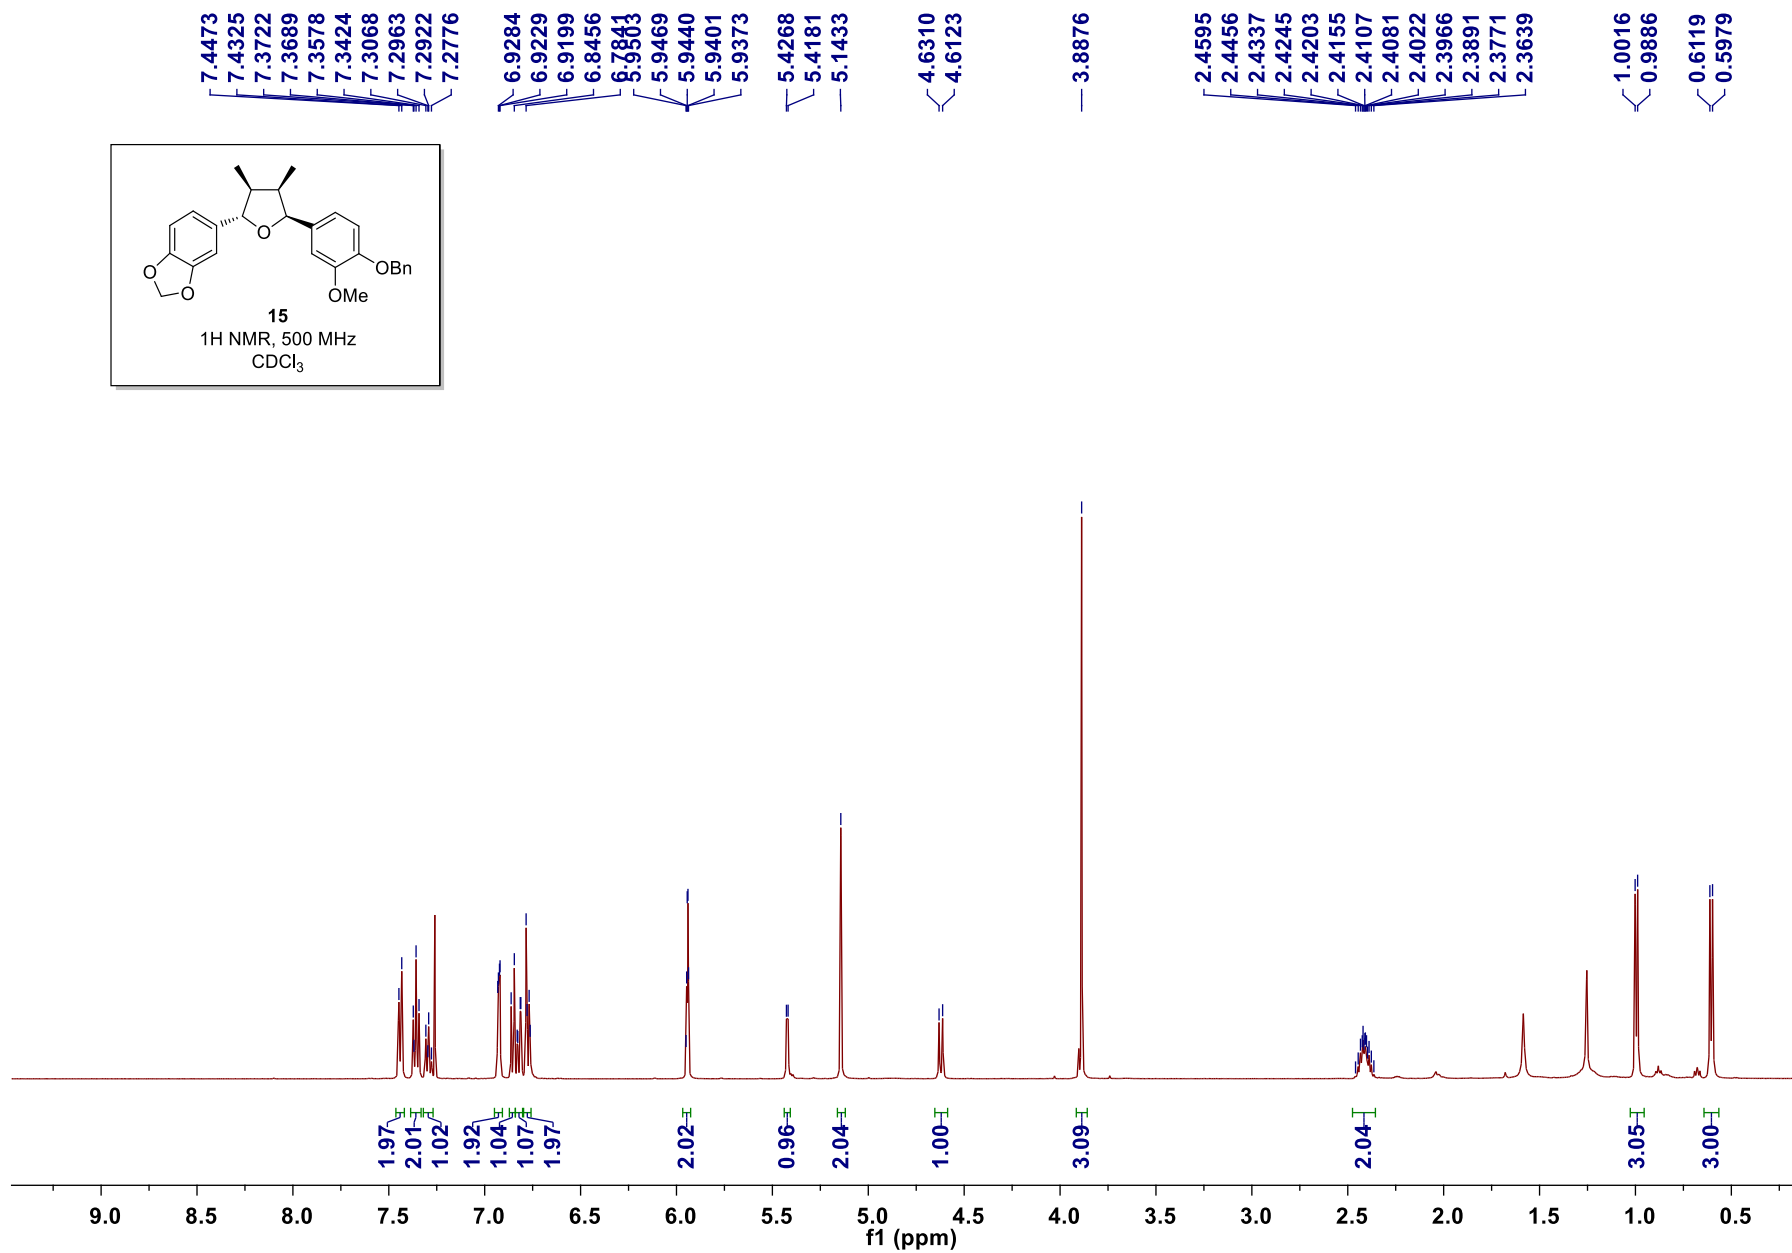

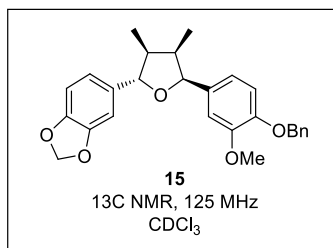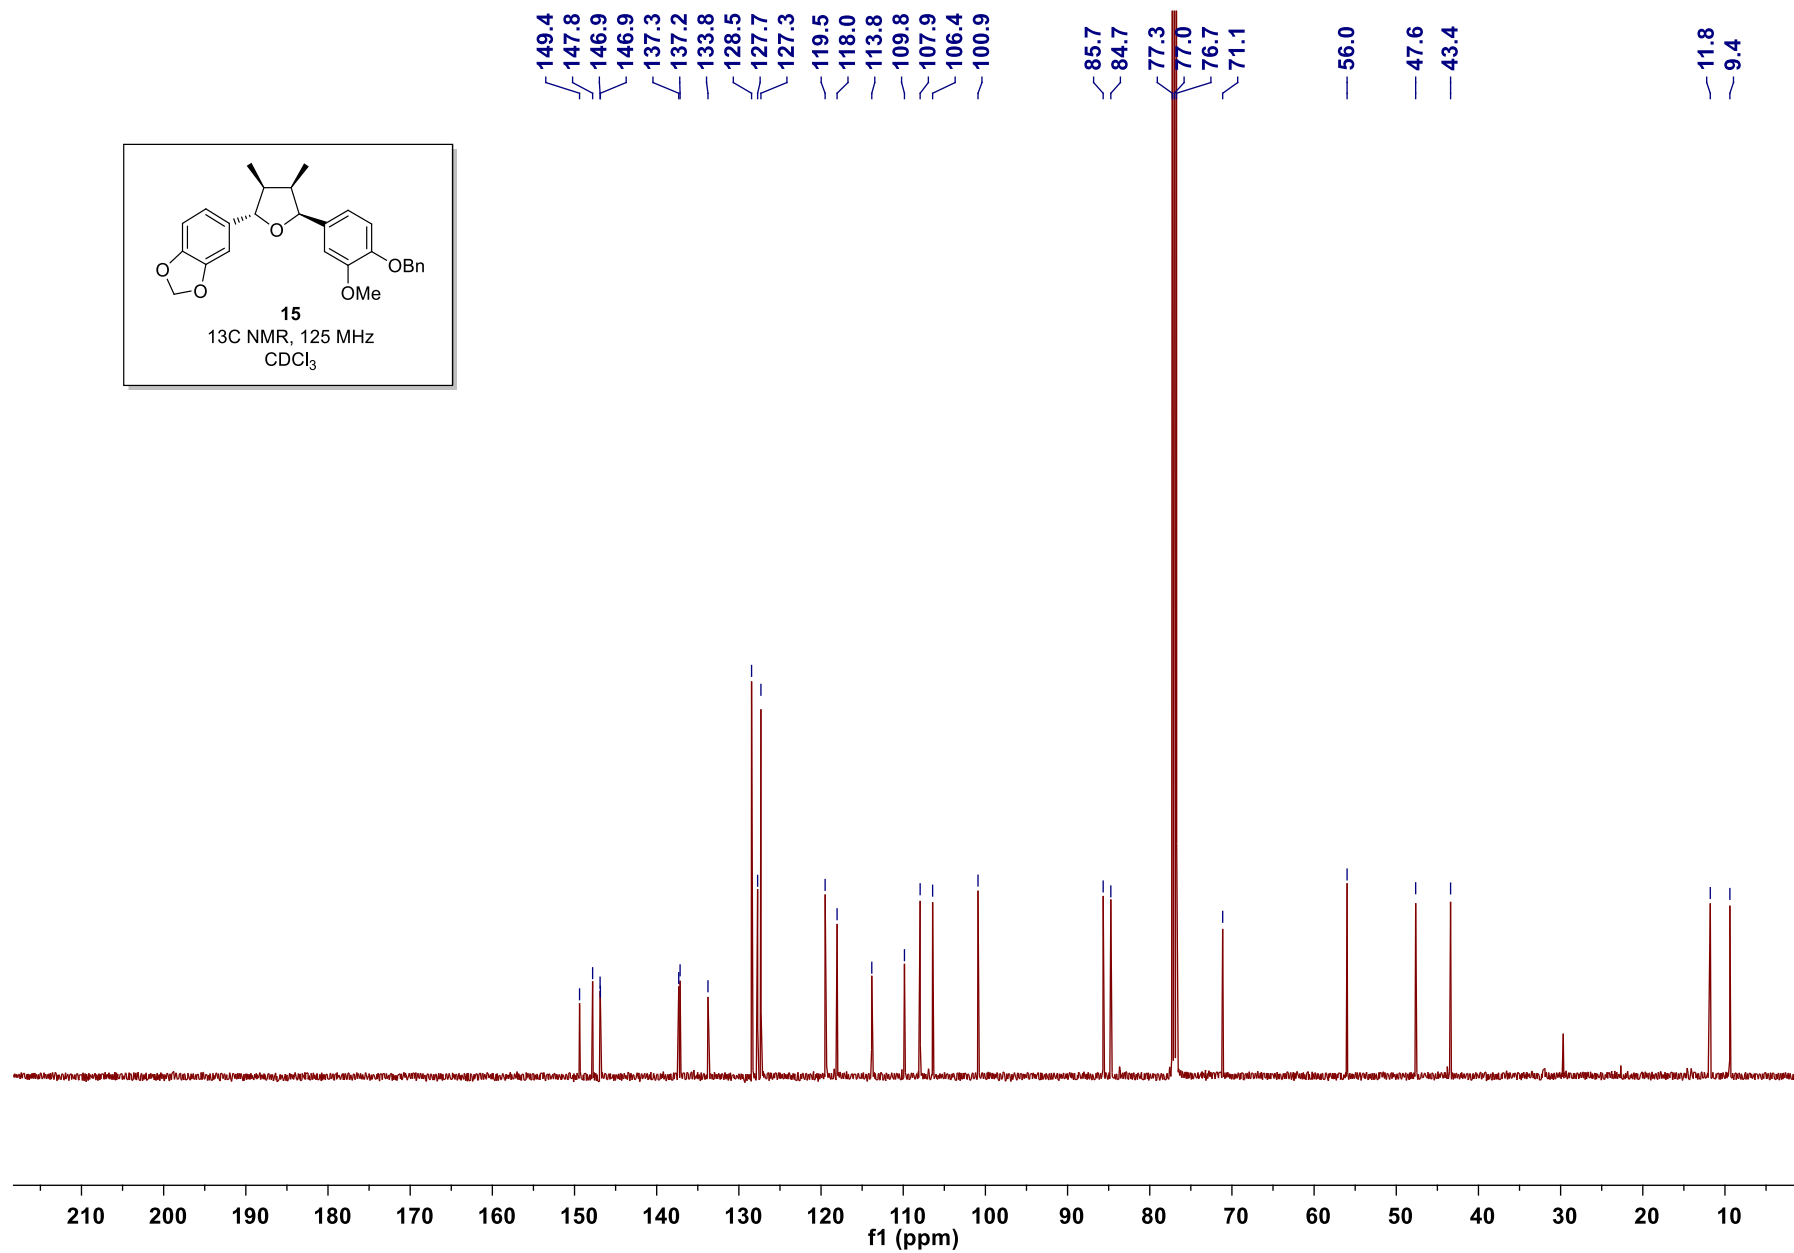

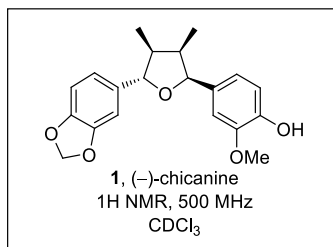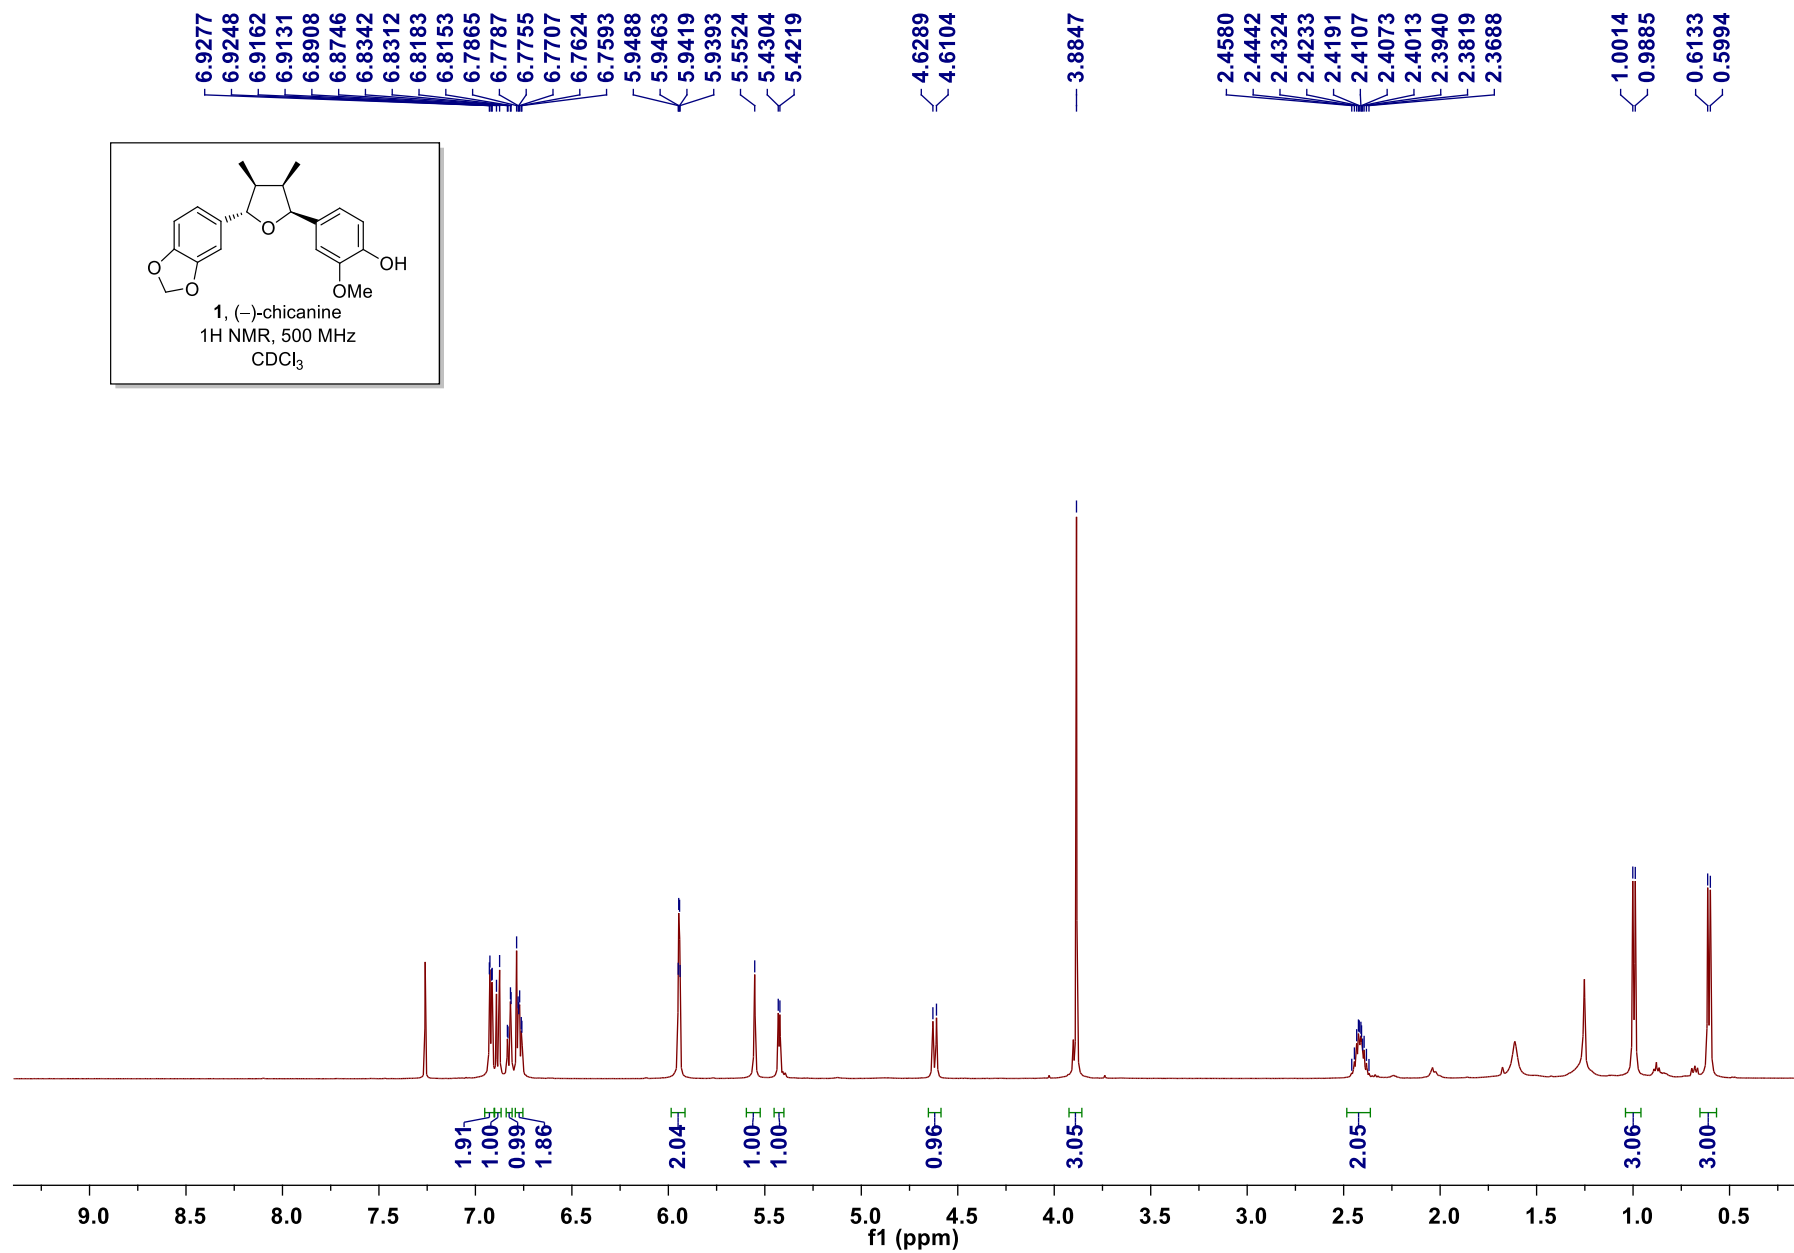



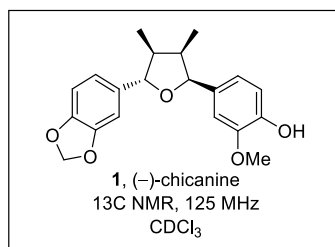

147.8  
 146.9  
 146.2  
 144.3  
 — 137.2  
 — 132.5

119.5  
 118.8  
 113.9  
 108.7  
 108.0  
 106.4  
 100.9

85.7  
 84.8  
 77.3  
 77.0  
 76.7

— 55.9  
 — 47.6  
 — 43.4

— 11.8  
 — 9.4

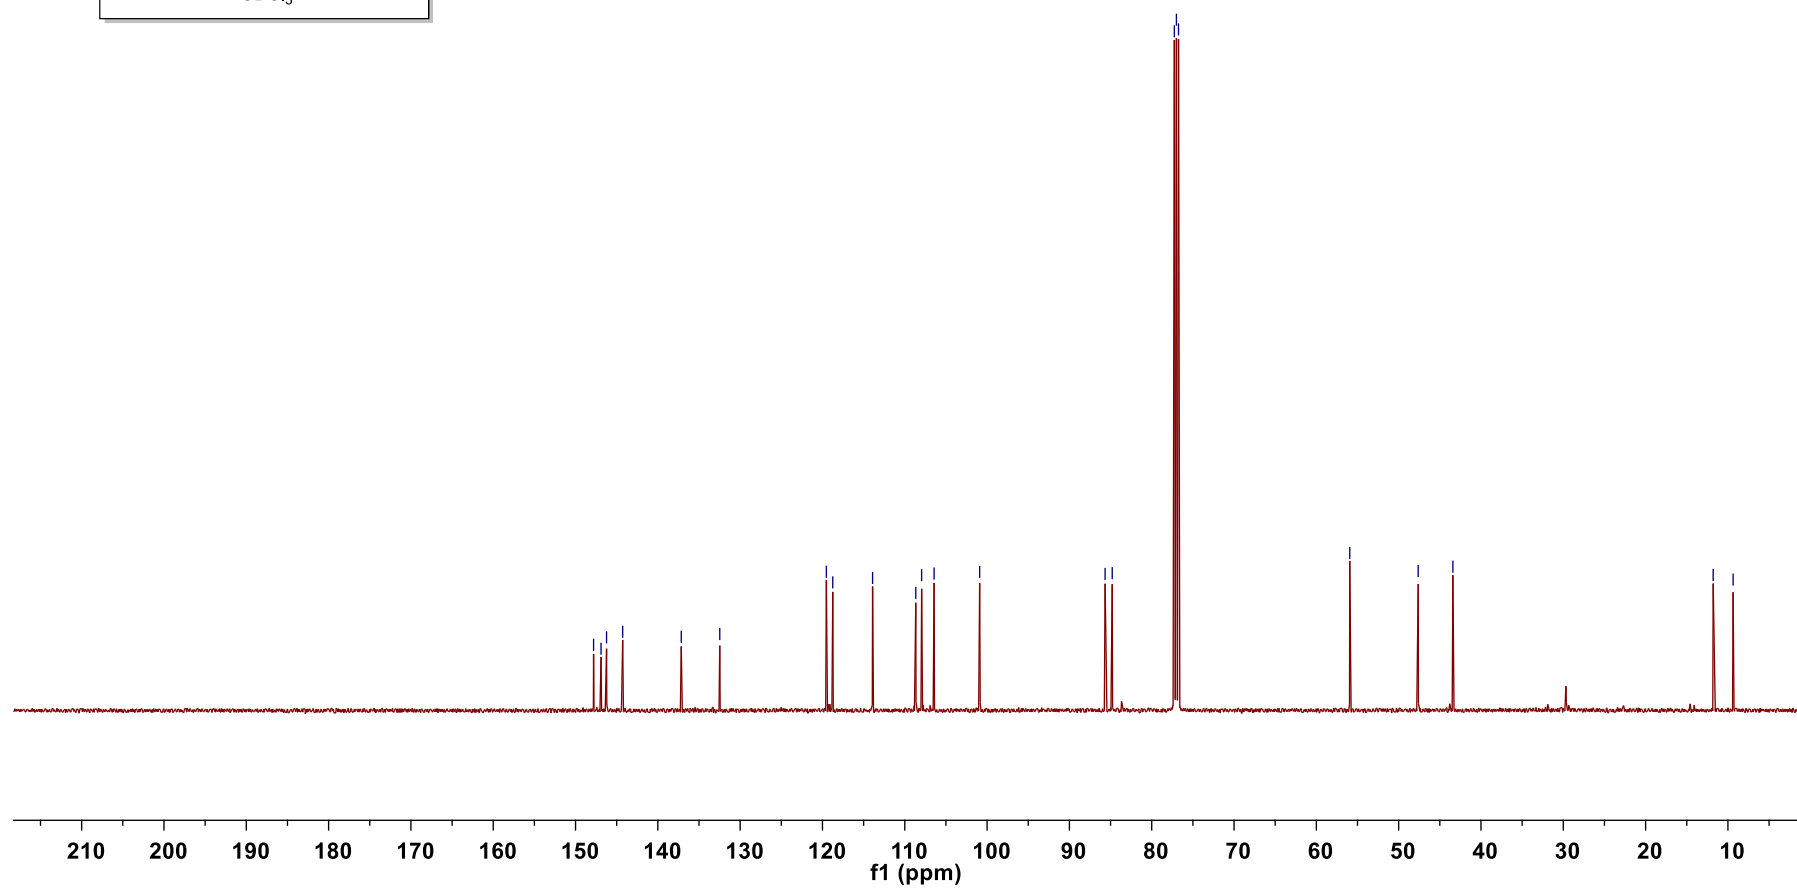

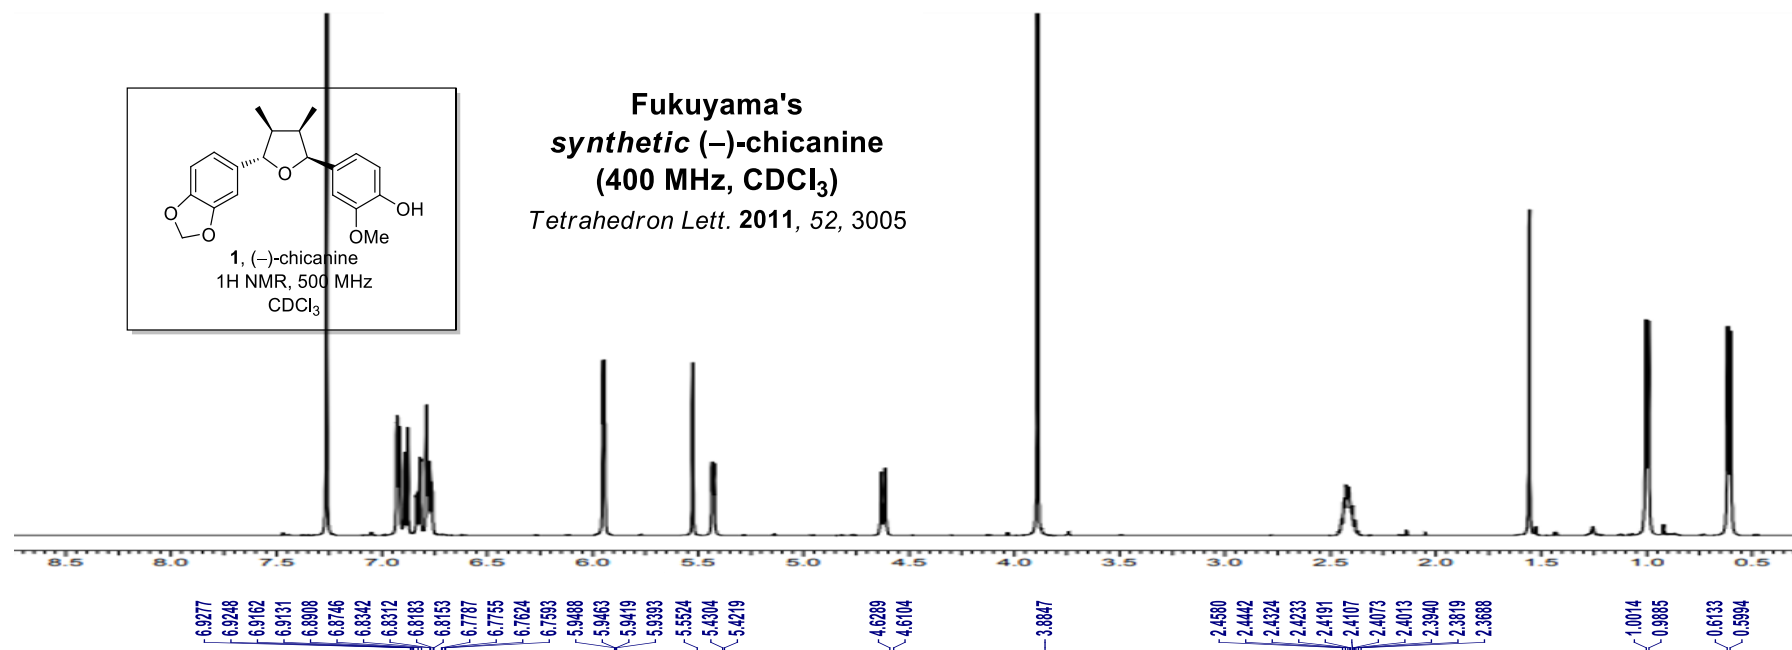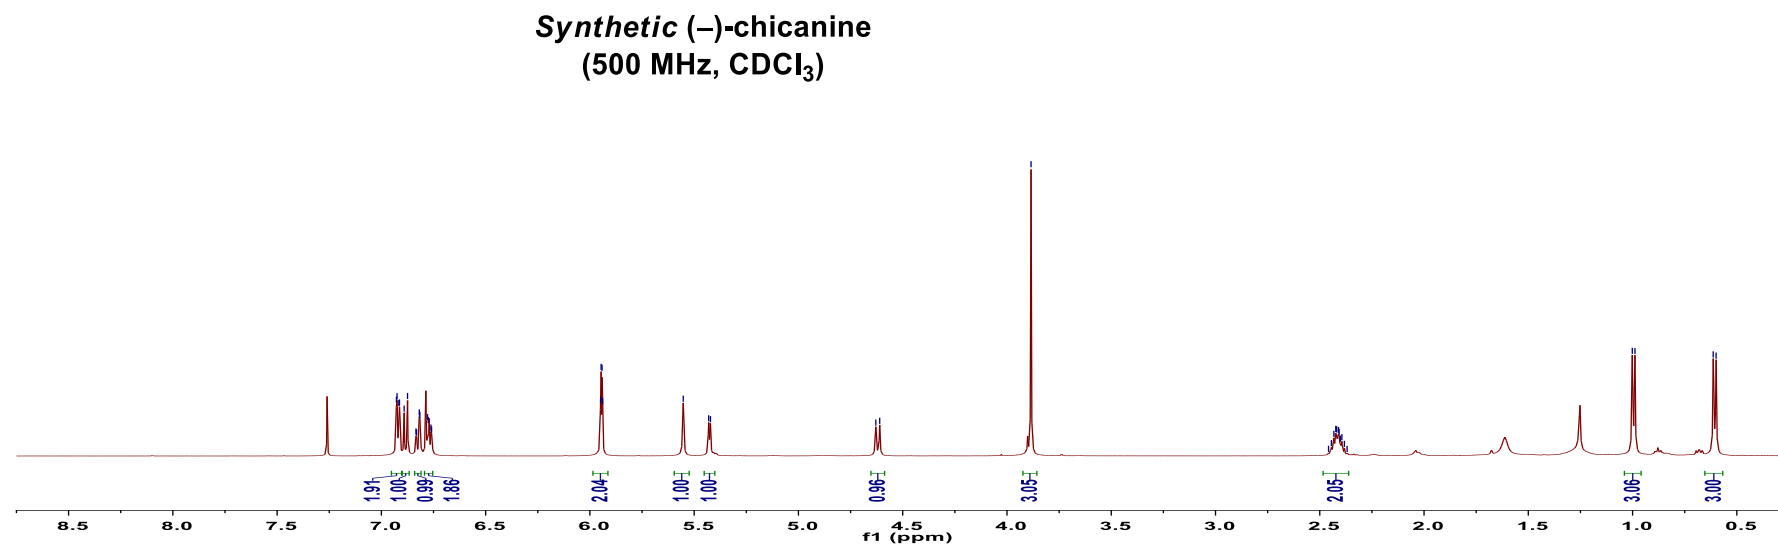

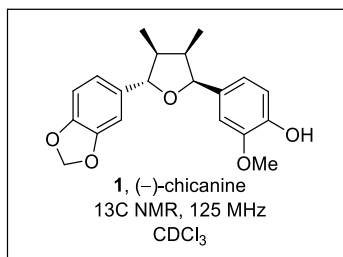

**Fukuyama's  
synthetic (-)-chicanine  
(100 MHz, CDCl<sub>3</sub>)**  
*Tetrahedron Lett.* **2011**, 52, 3005

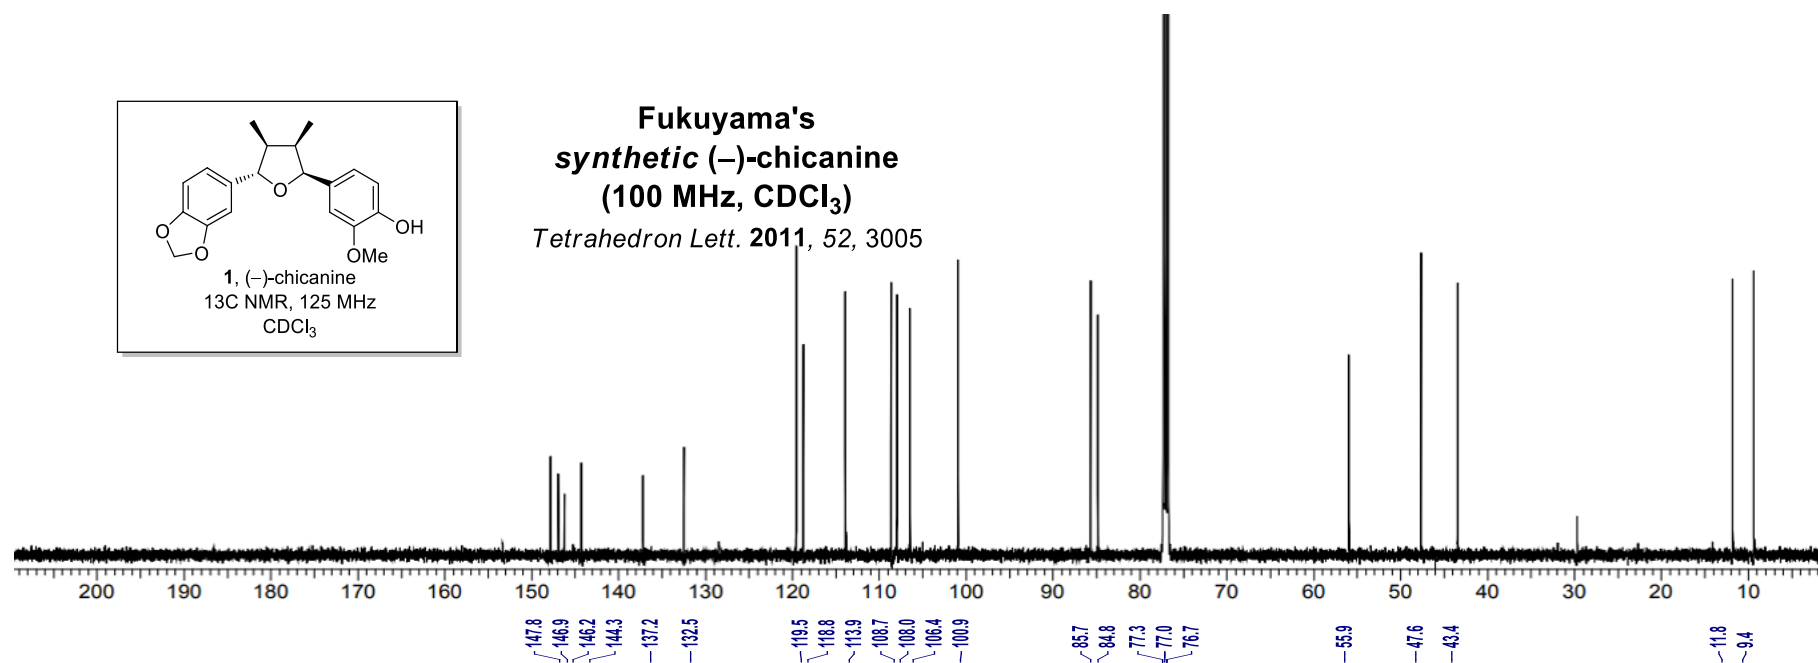

**Synthetic (-)-chicanine  
(125 MHz, CDCl<sub>3</sub>)**

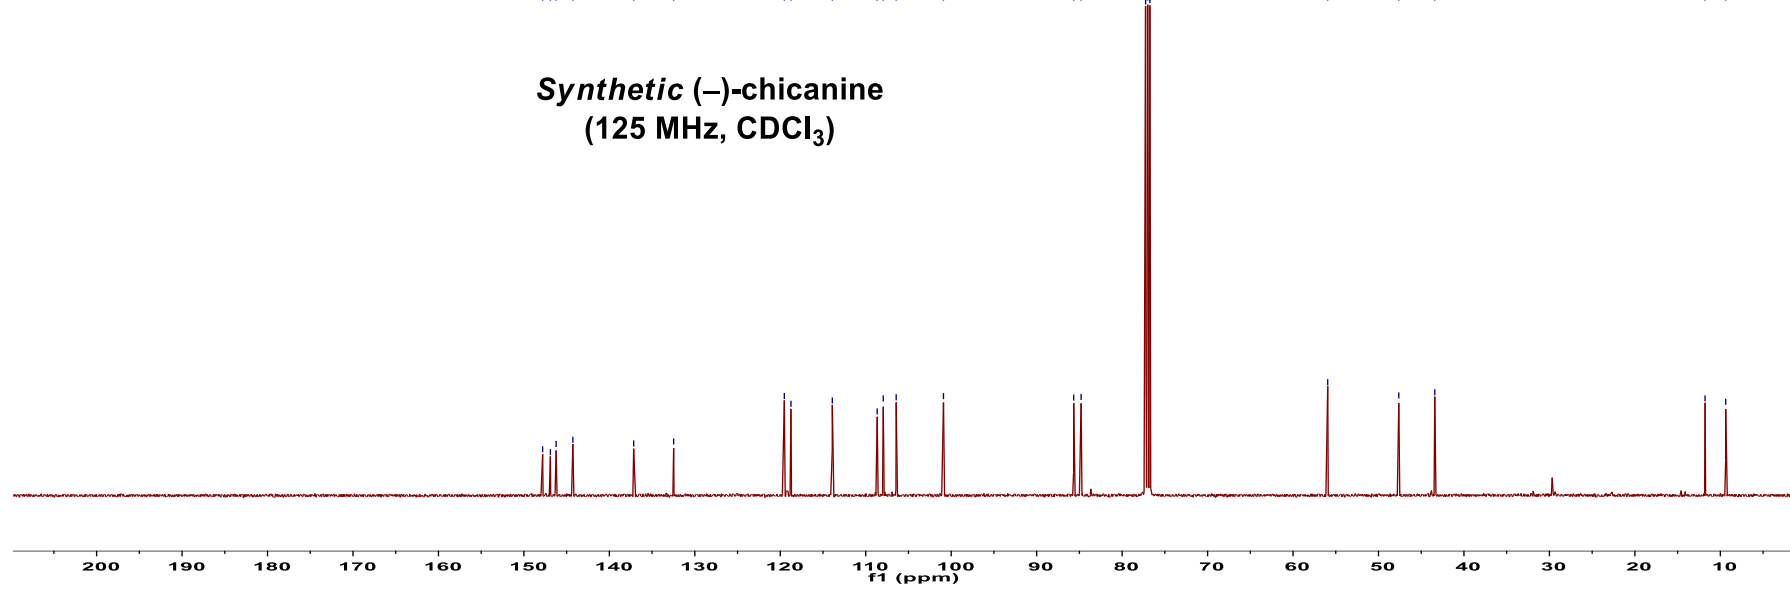

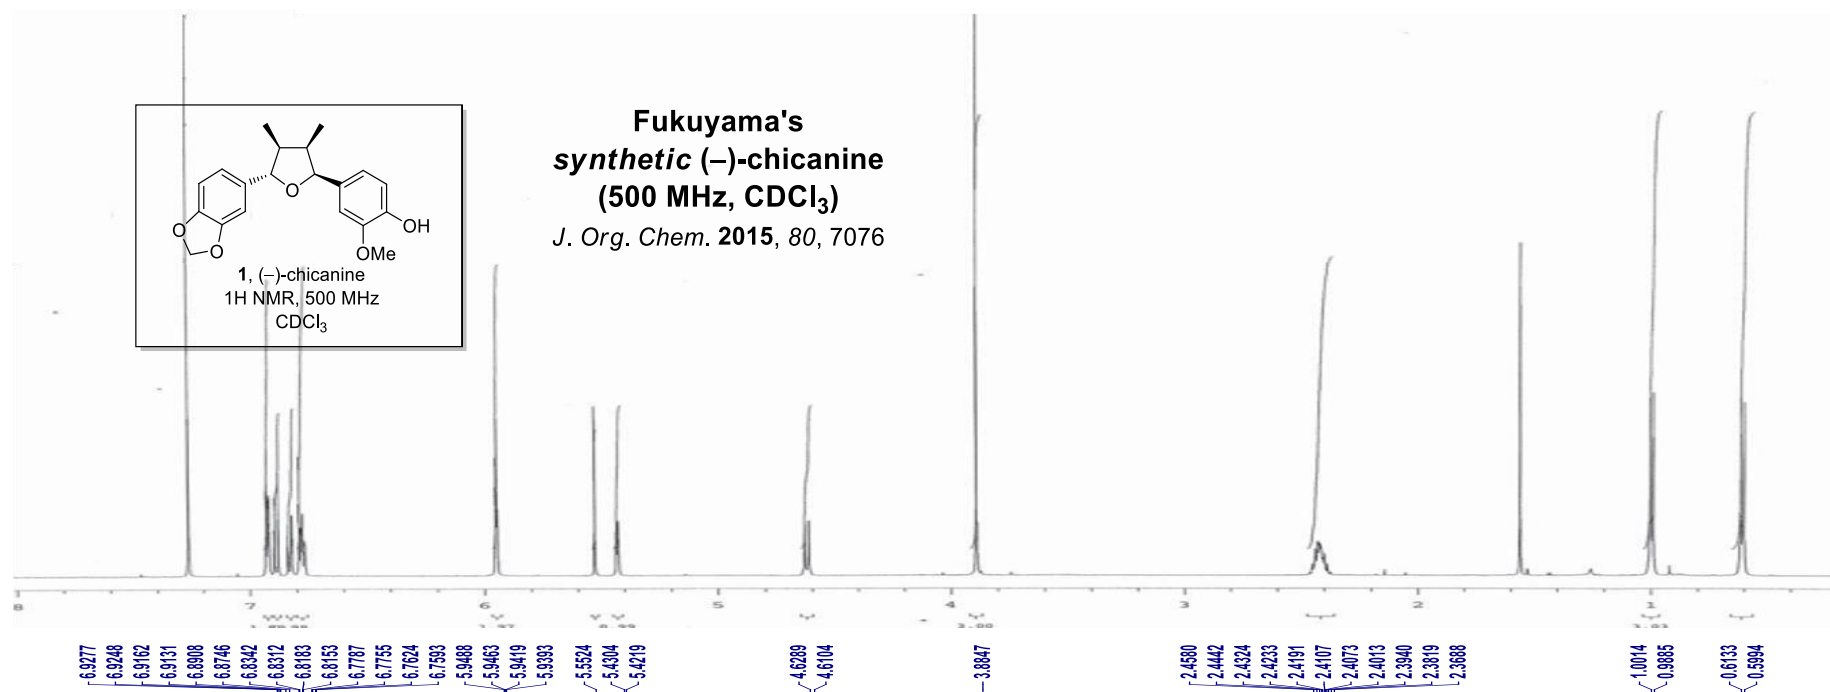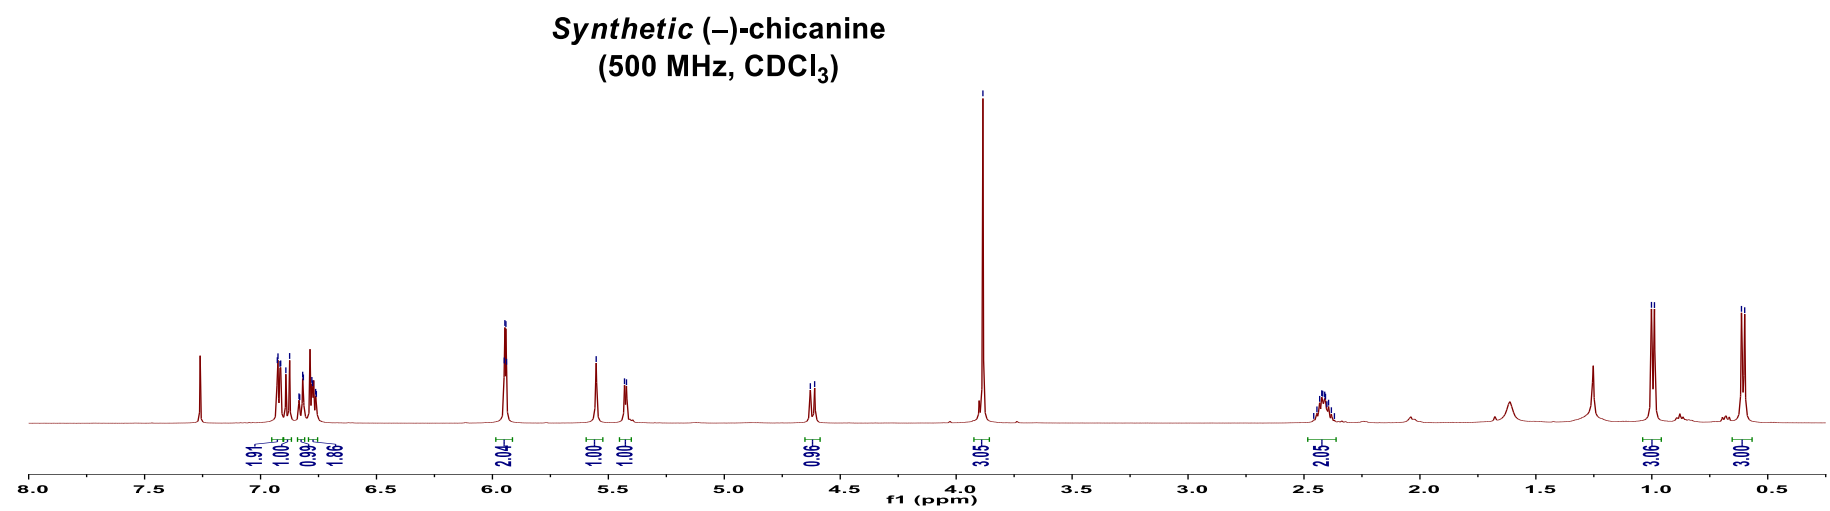

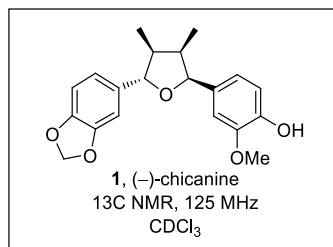

**Fukuyama's  
*synthetic* (-)-chicanine  
 (125 MHz, CDCl<sub>3</sub>)  
*J. Org. Chem.* 2015, 80, 7076**

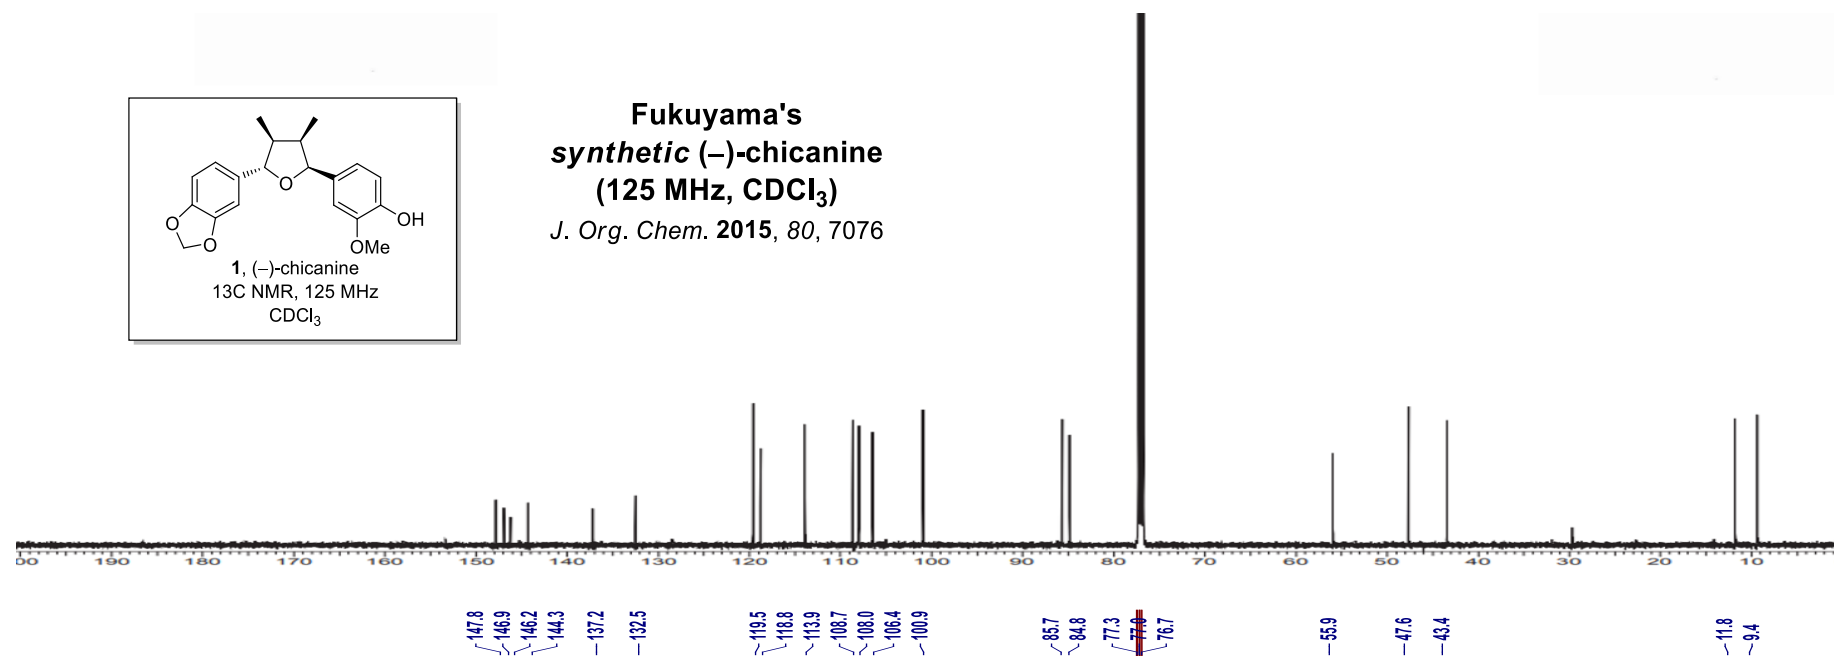

***Synthetic* (-)-chicanine  
 (125 MHz, CDCl<sub>3</sub>)**

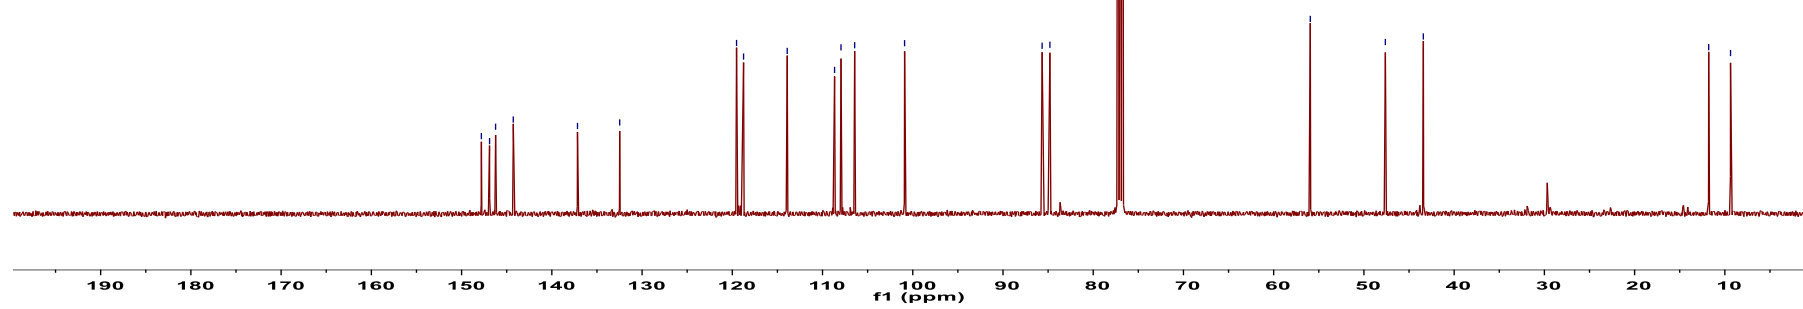

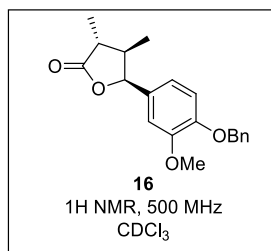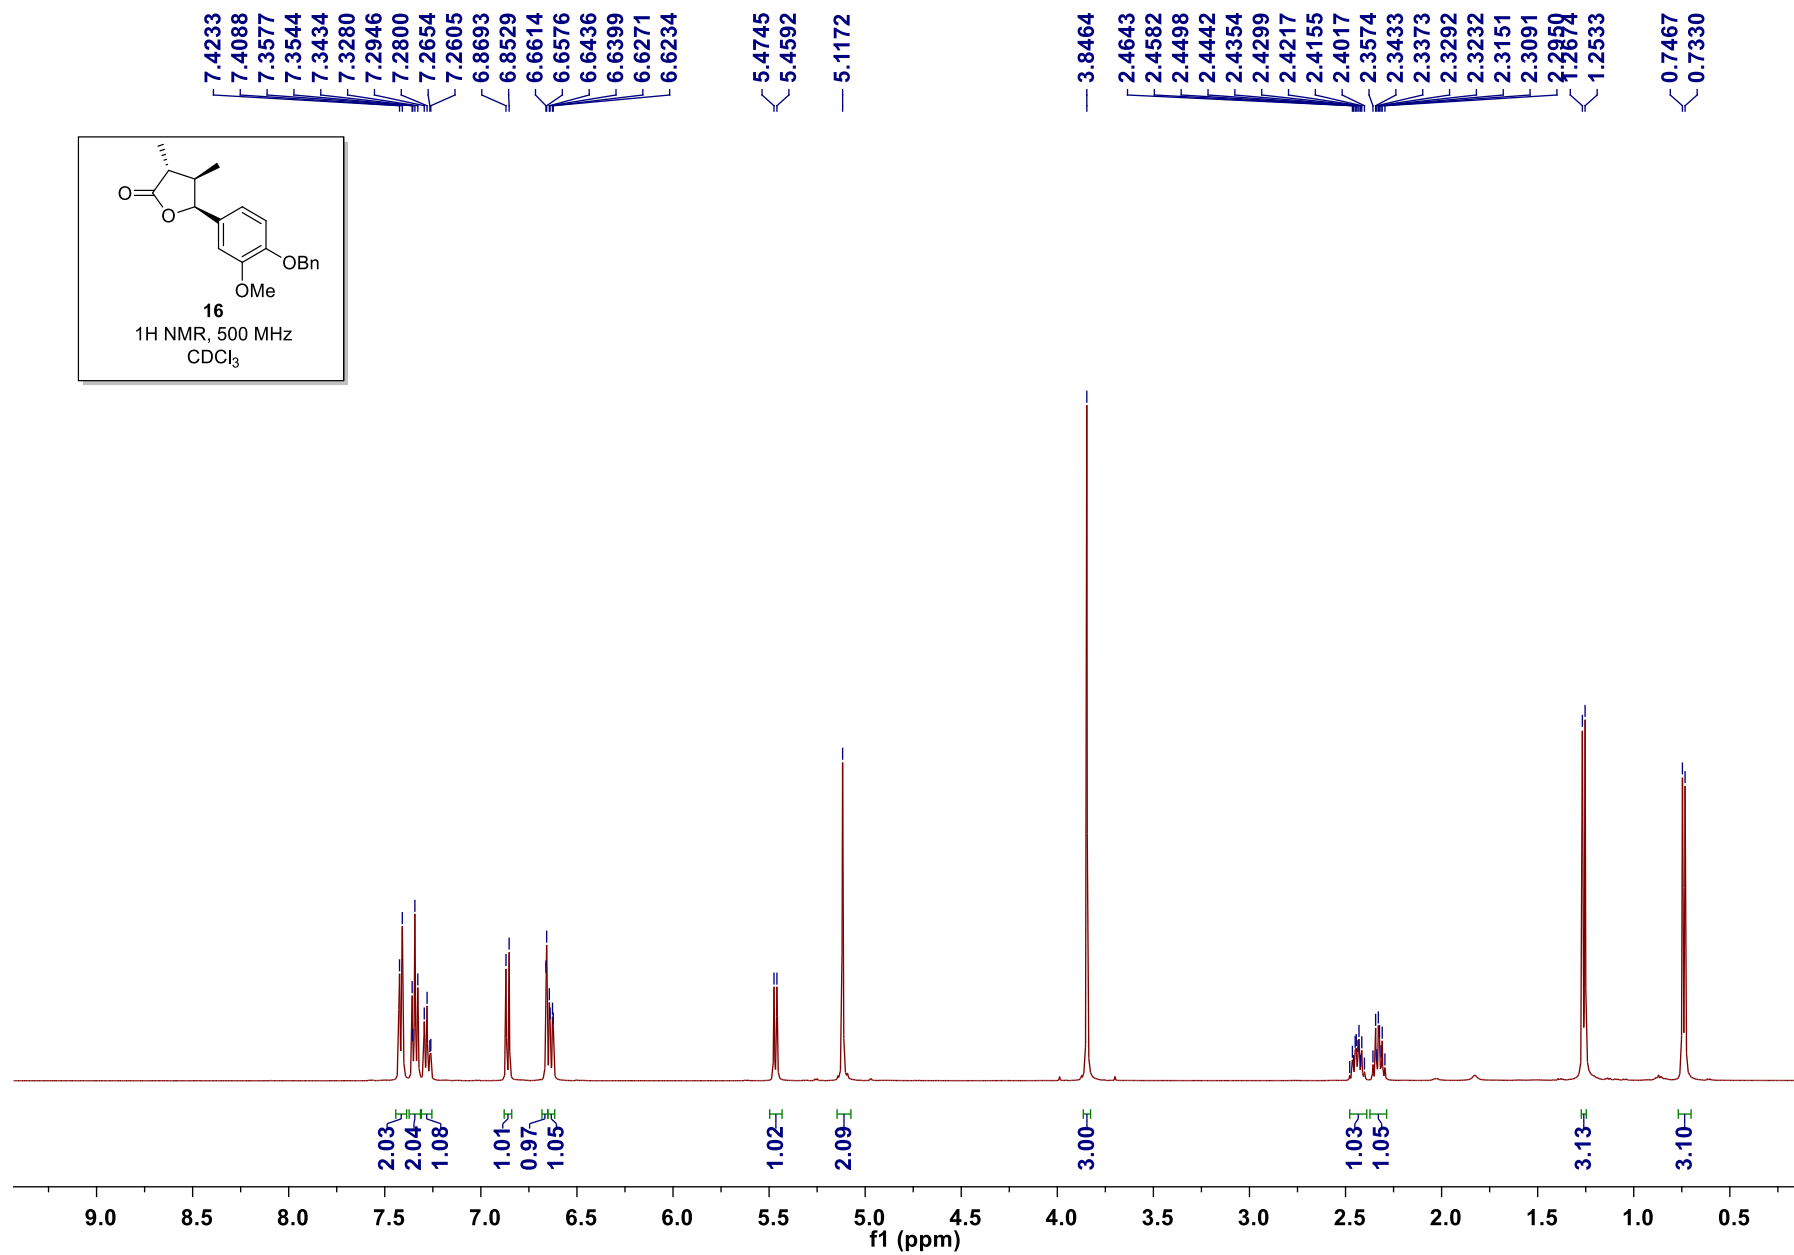

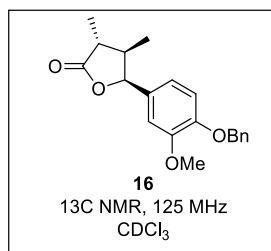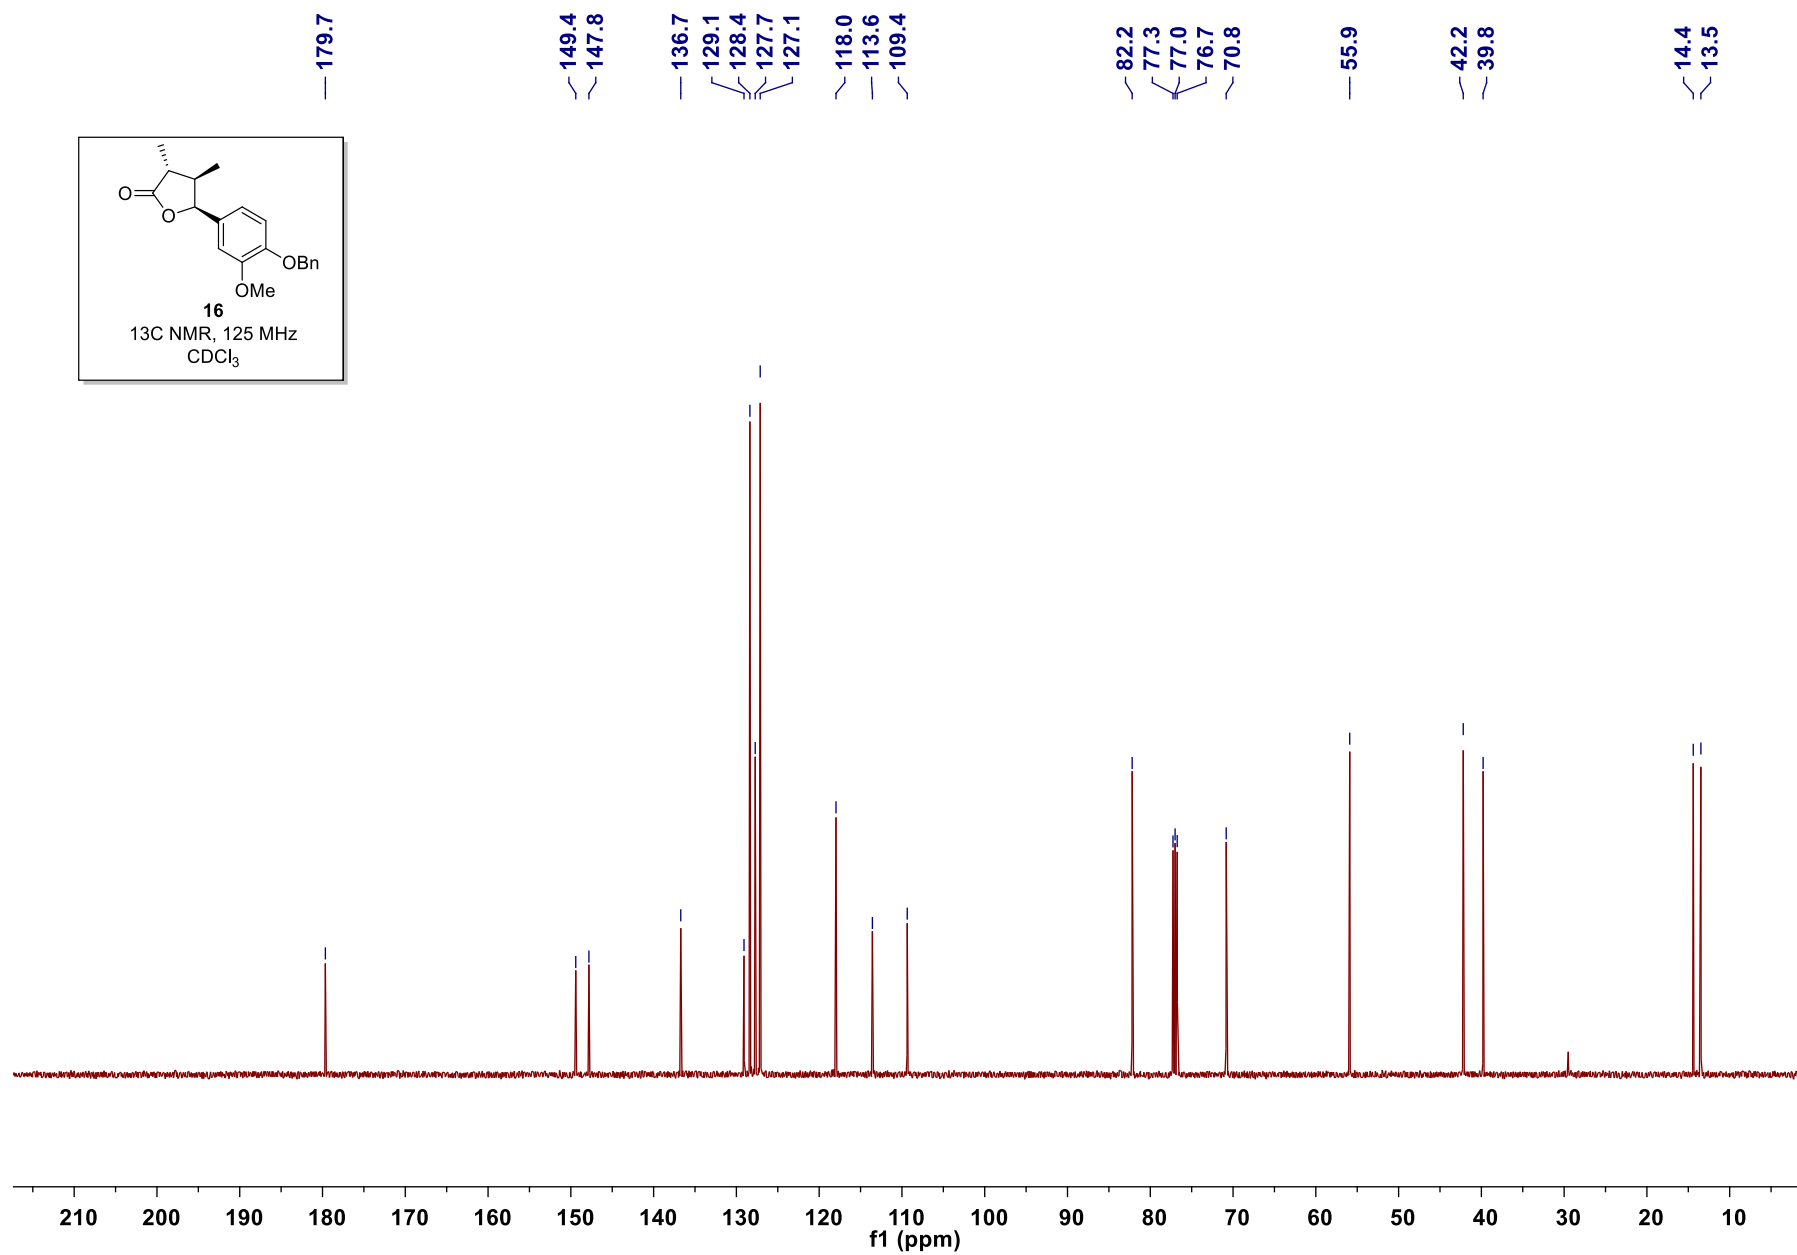

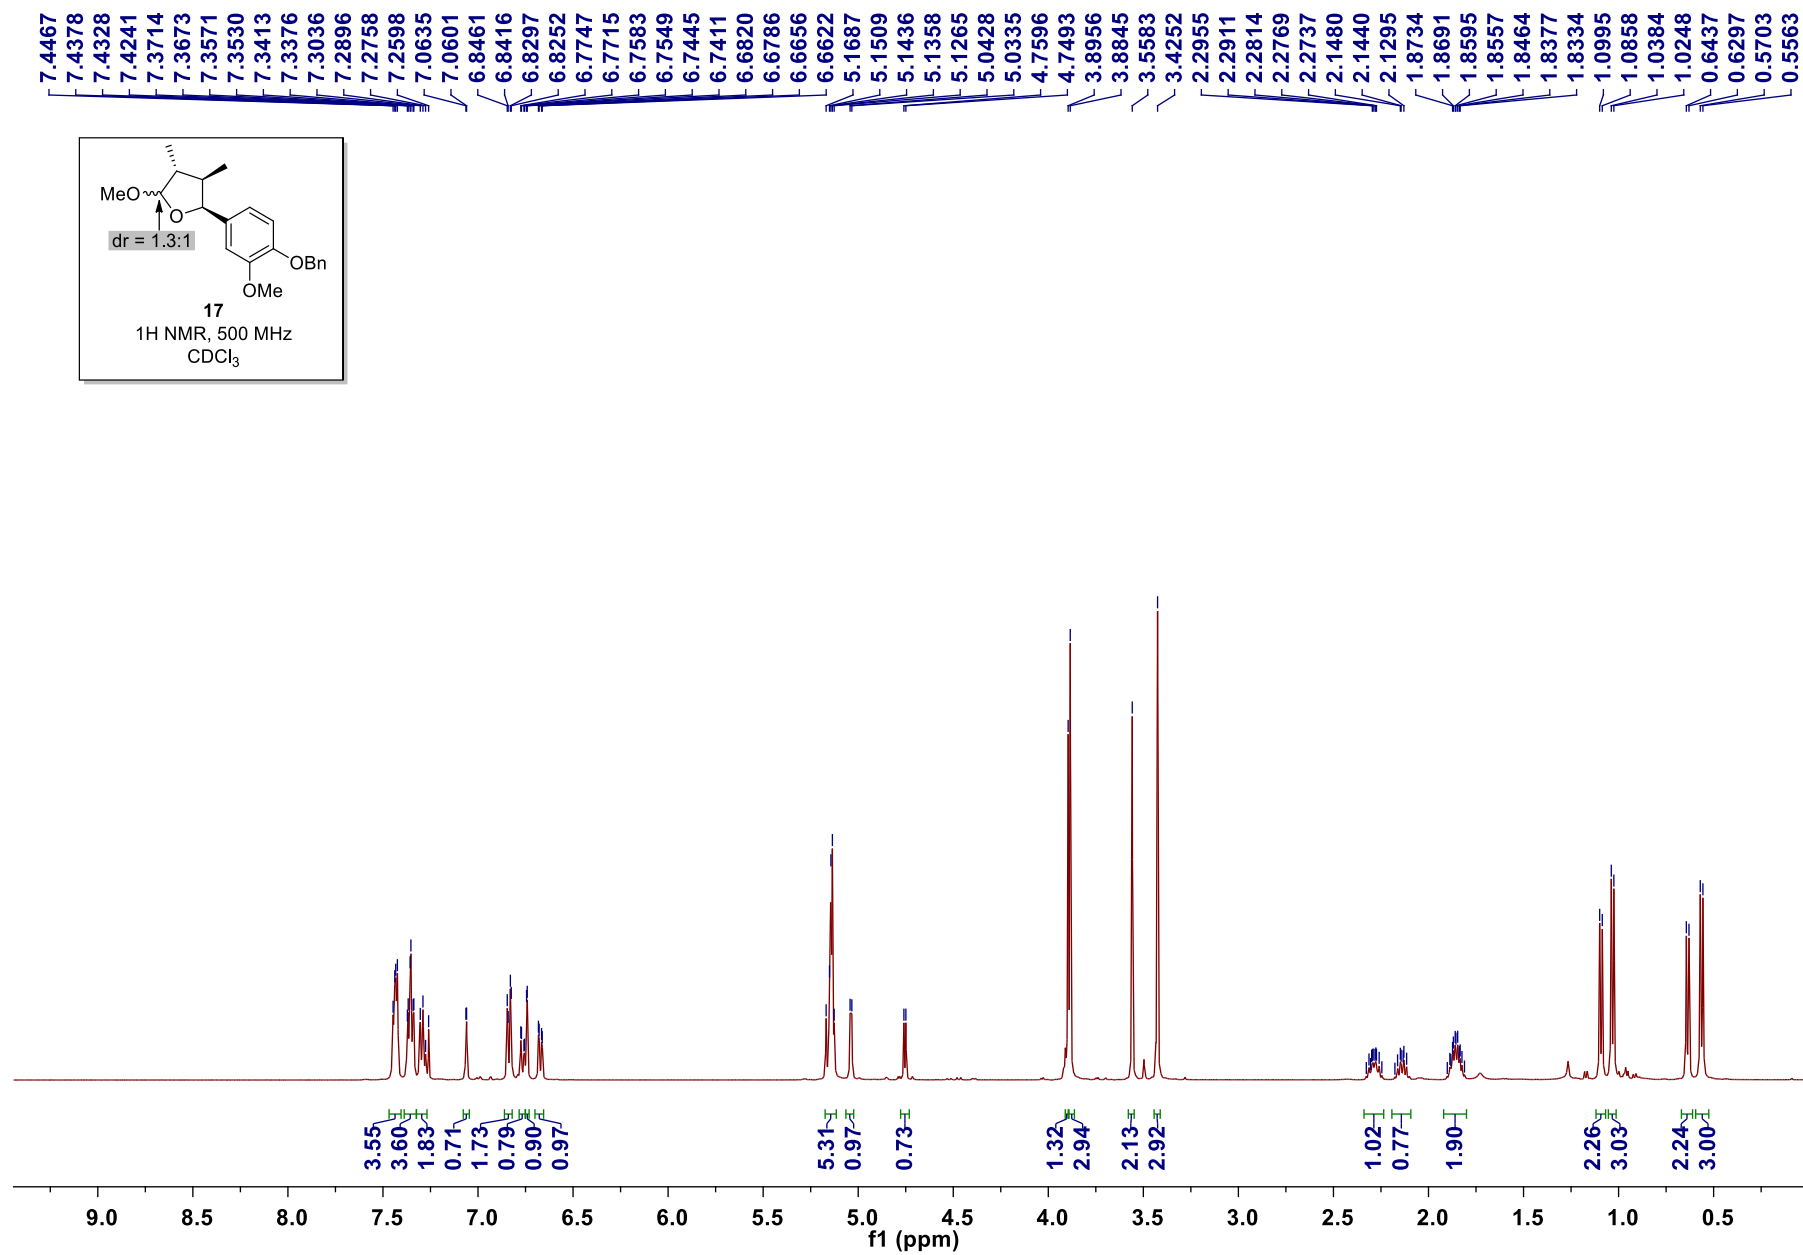



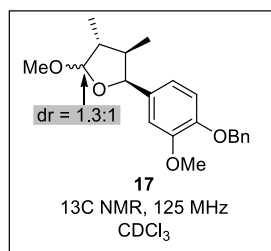

149.2  
149.2  
147.1  
146.9

128.4  
127.7  
127.7  
127.2  
127.2  
118.8  
113.6  
113.3  
112.5  
110.7  
110.4  
106.1

84.7  
83.1  
77.3  
77.0  
76.7  
71.0

56.5  
55.9  
55.7  
54.8  
44.7  
44.2  
44.1  
41.3

14.8  
14.5  
14.2  
11.5

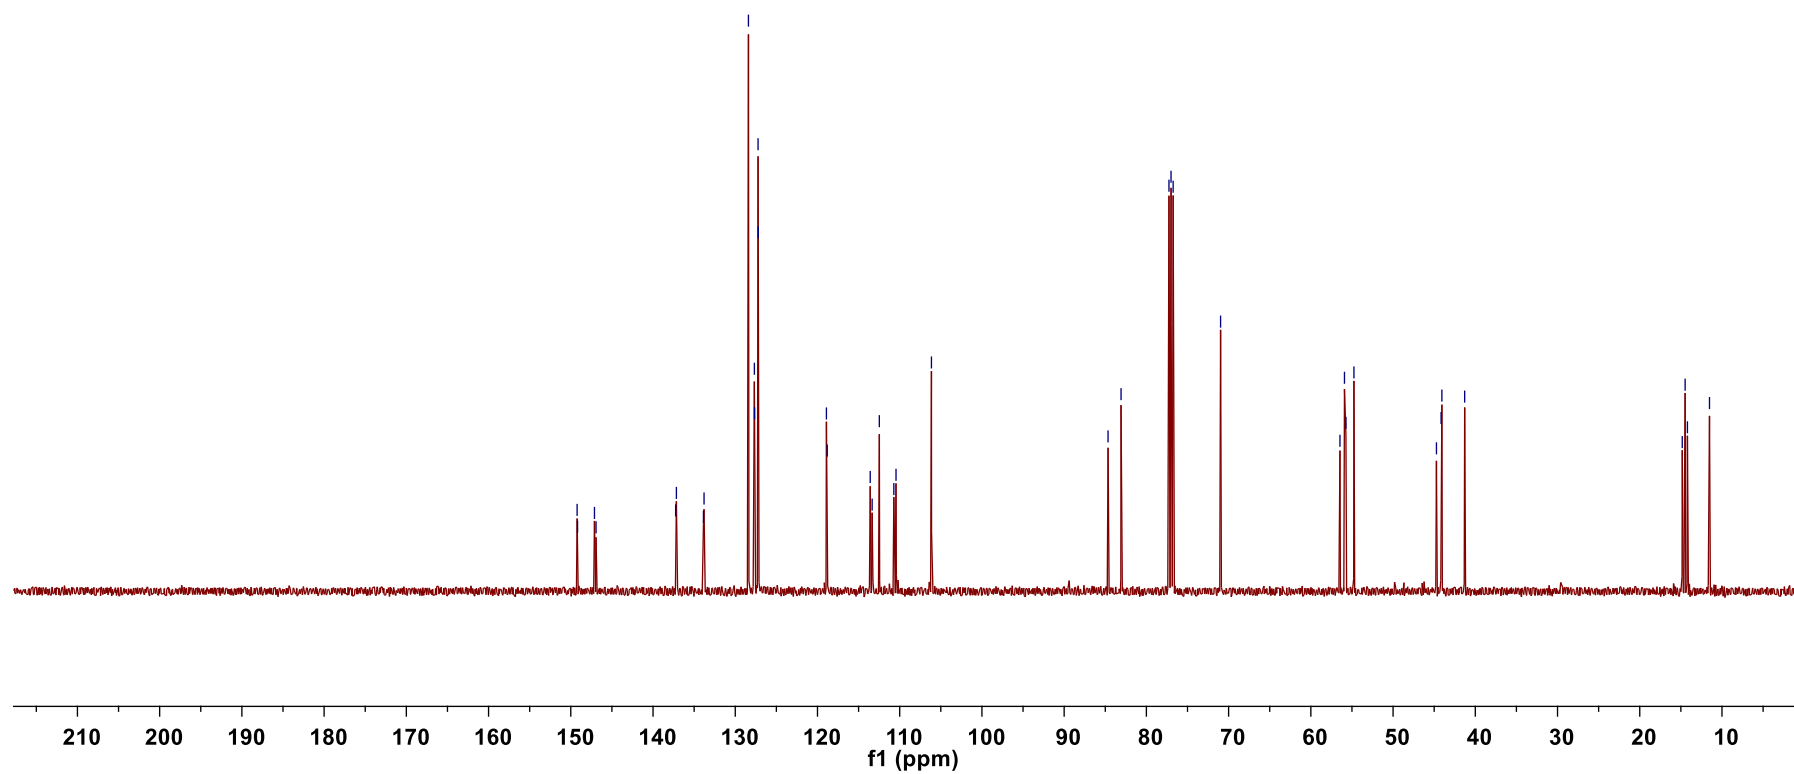

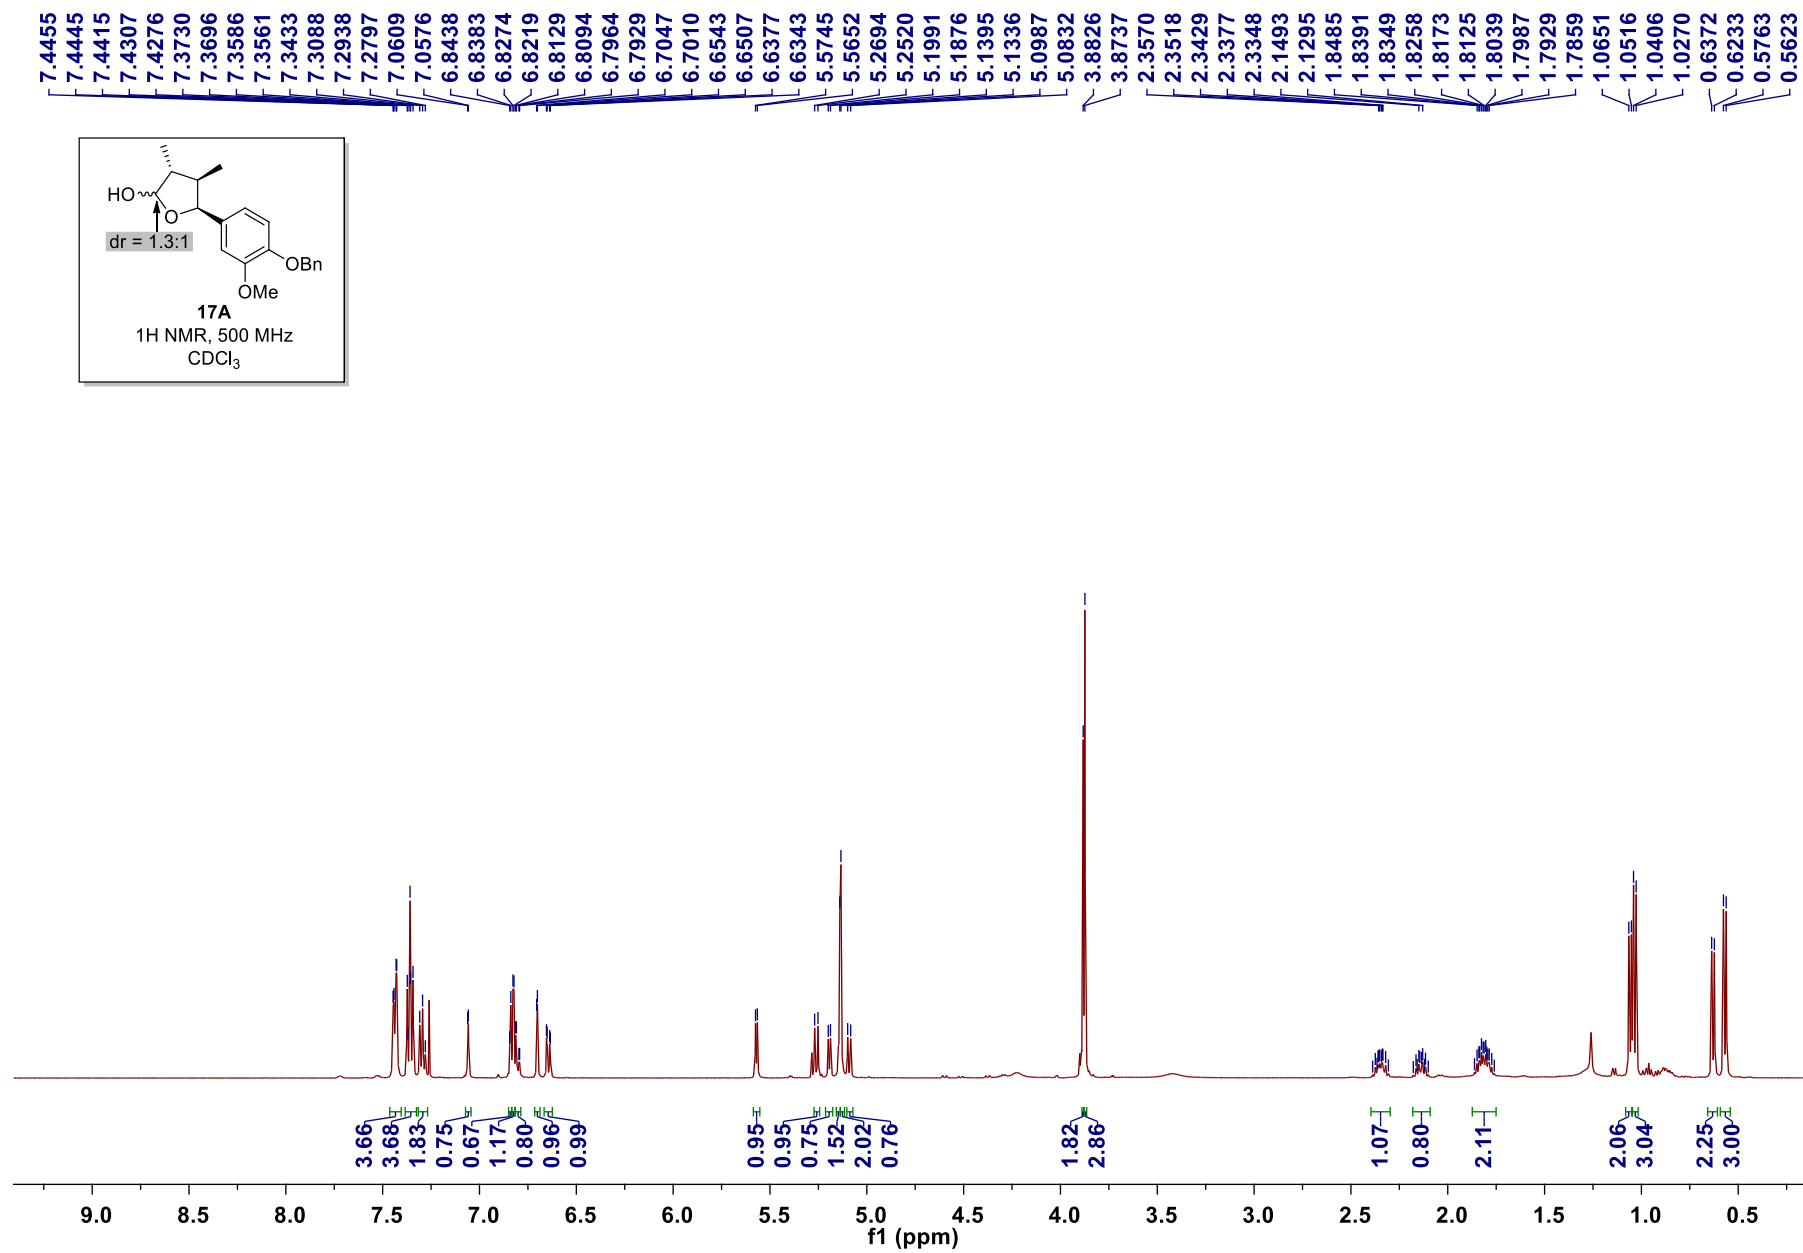

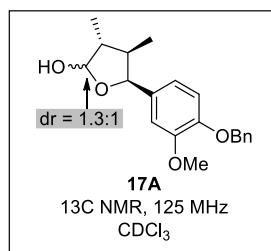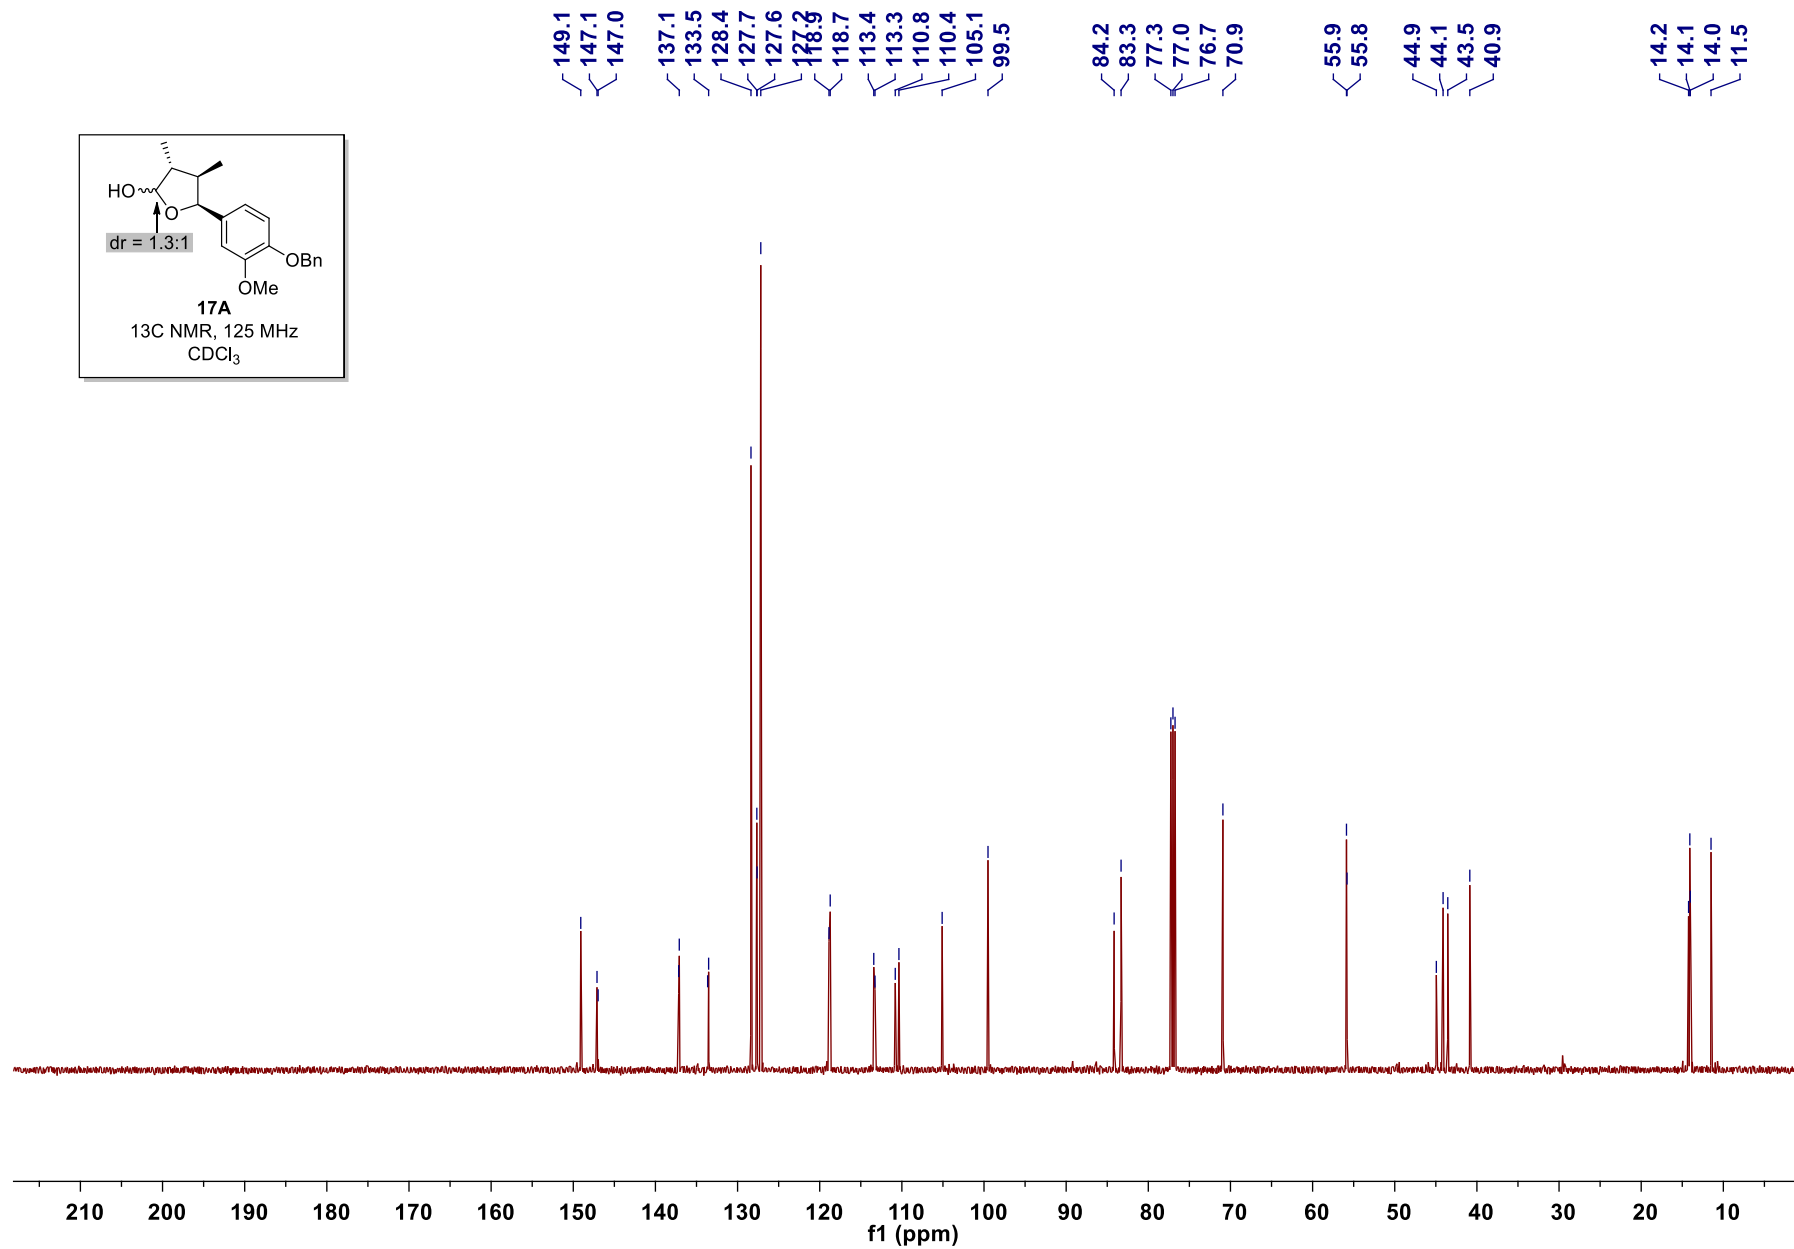

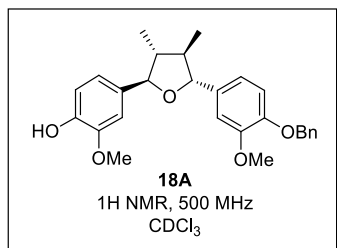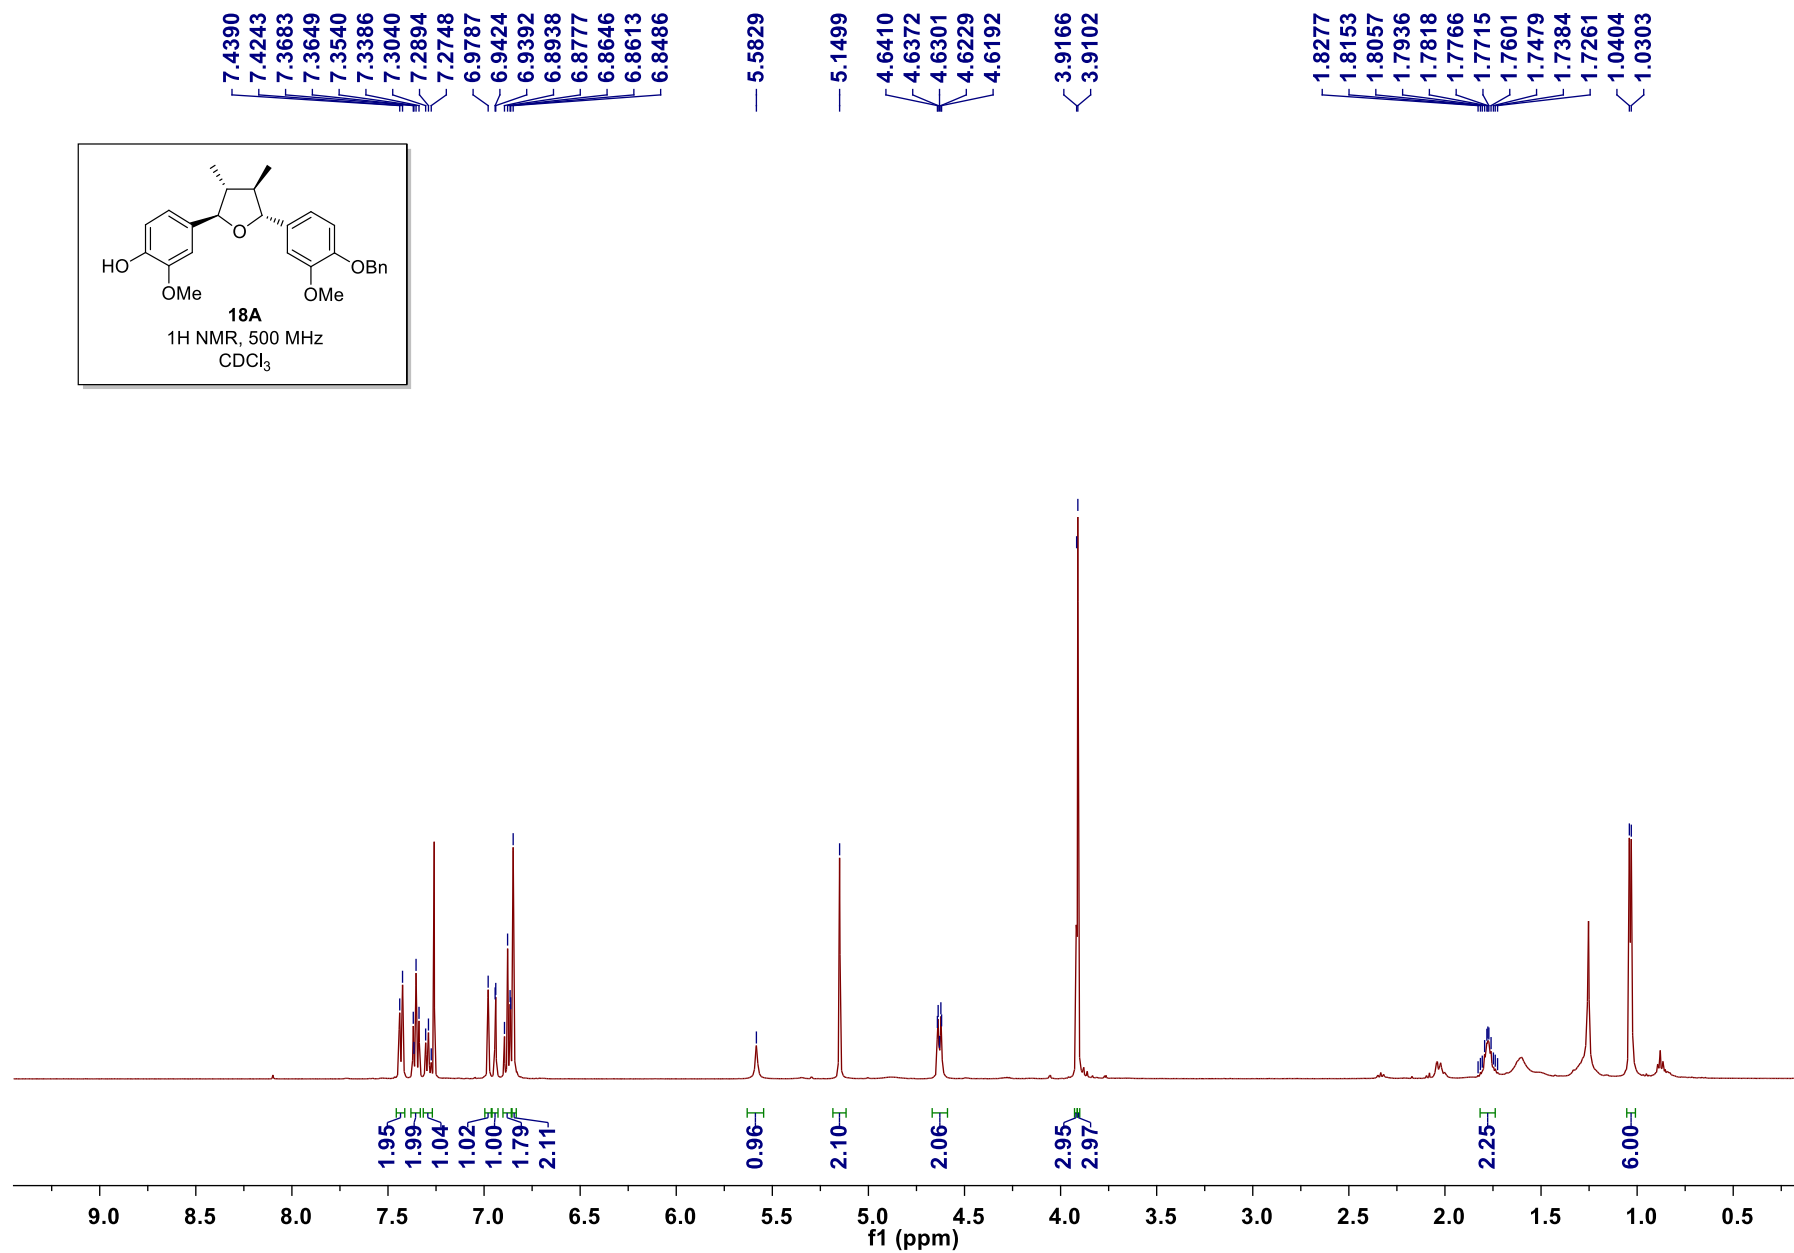

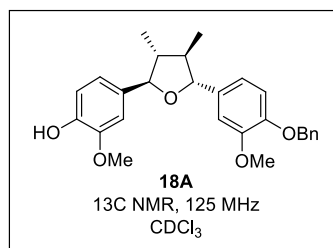

149.7  
 147.6  
 146.6  
 145.1  
 137.2  
 134.3  
 128.5  
 127.7  
 126.3  
 118.6  
 114.0  
 113.8  
 109.8  
 108.5

88.4  
 88.2

77.3  
 77.0  
 76.7  
 71.1

56.0  
 55.9  
 51.0  
 50.9

13.9  
 13.8

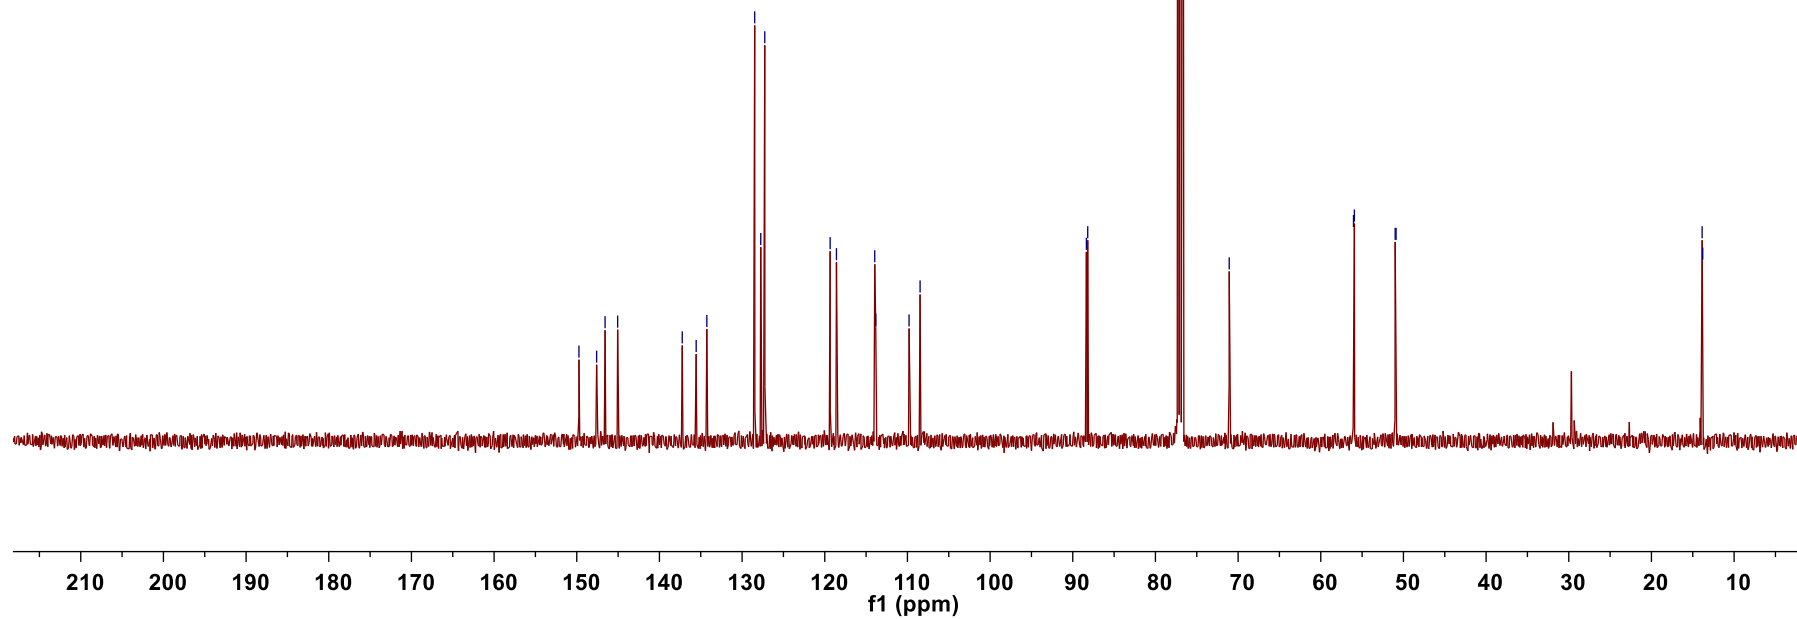

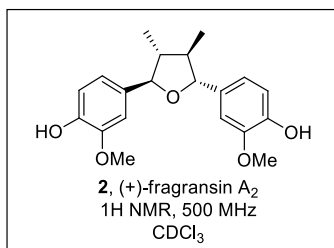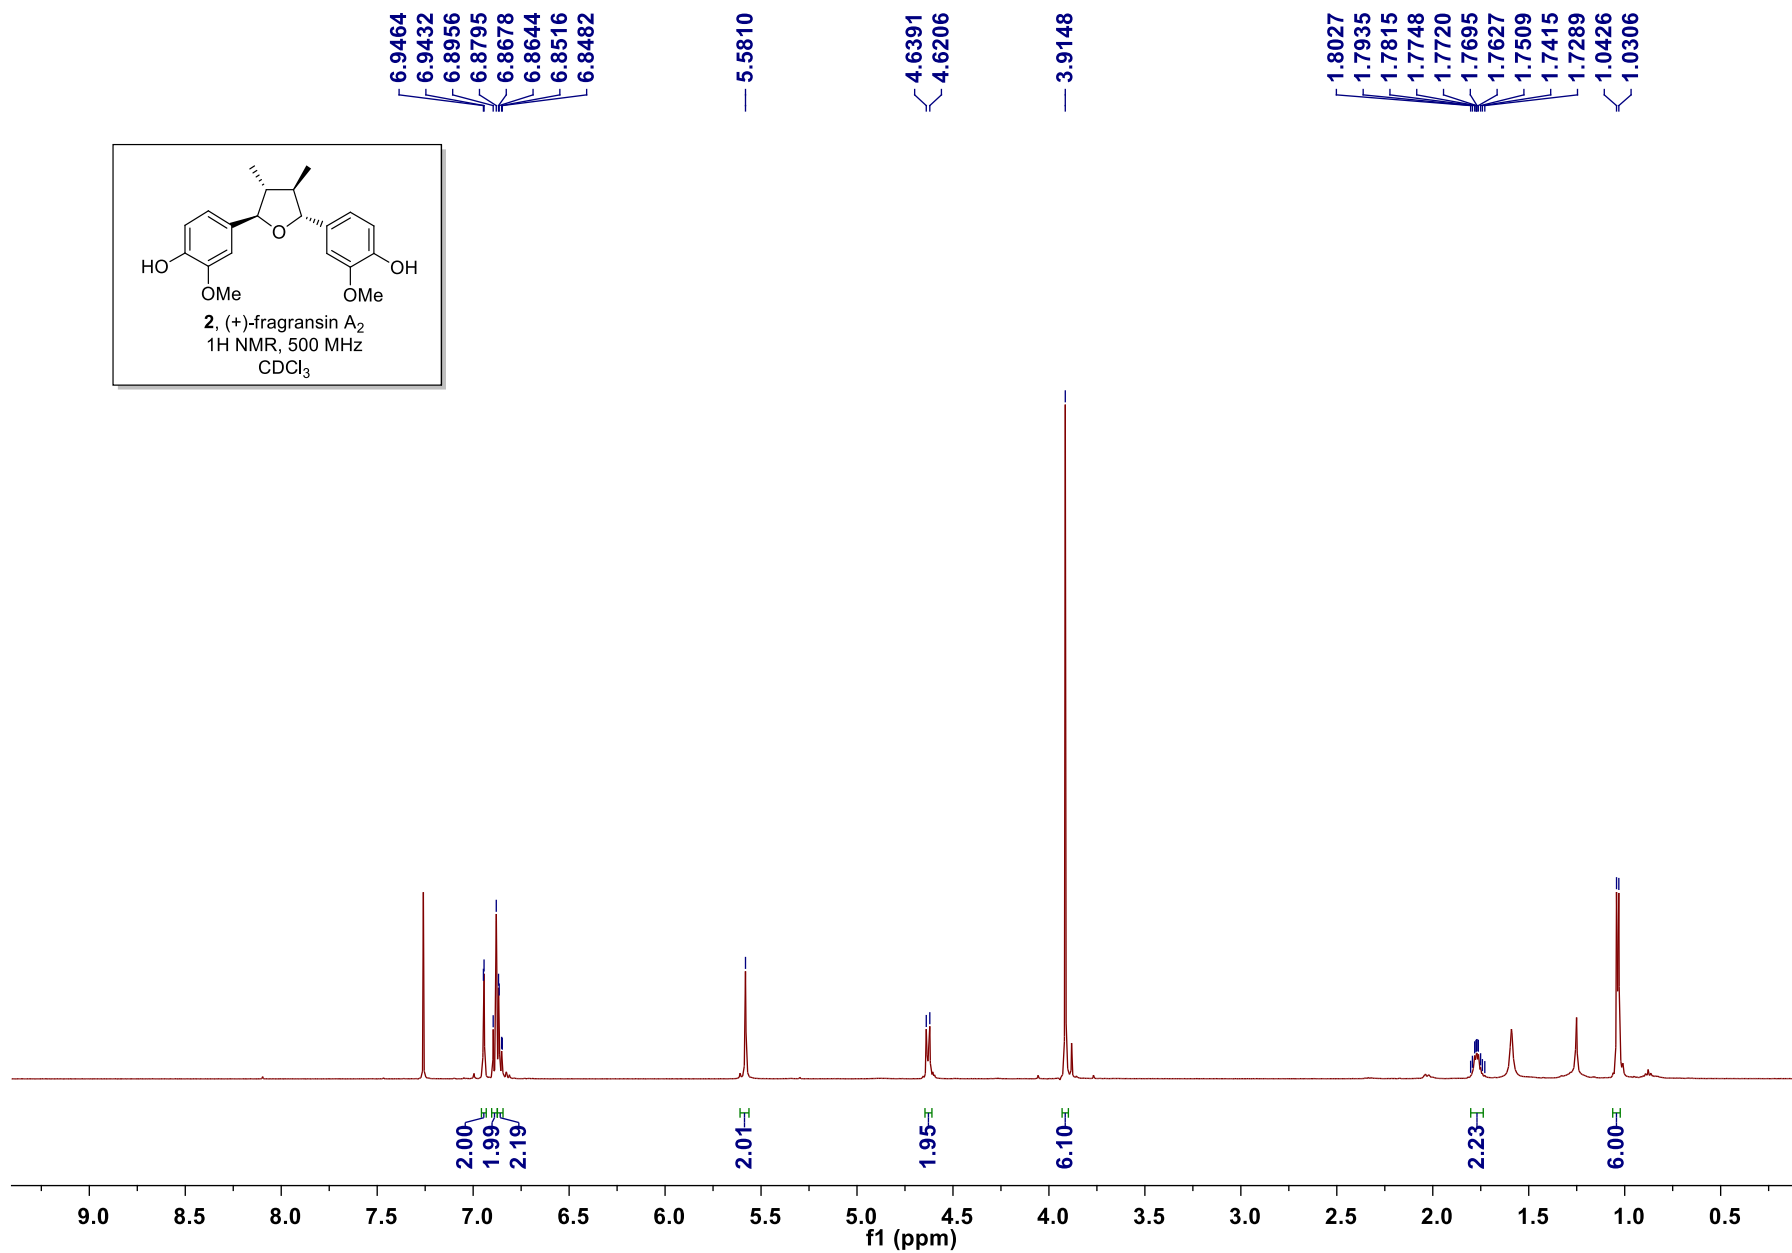

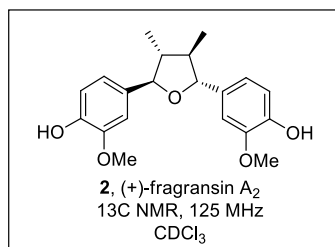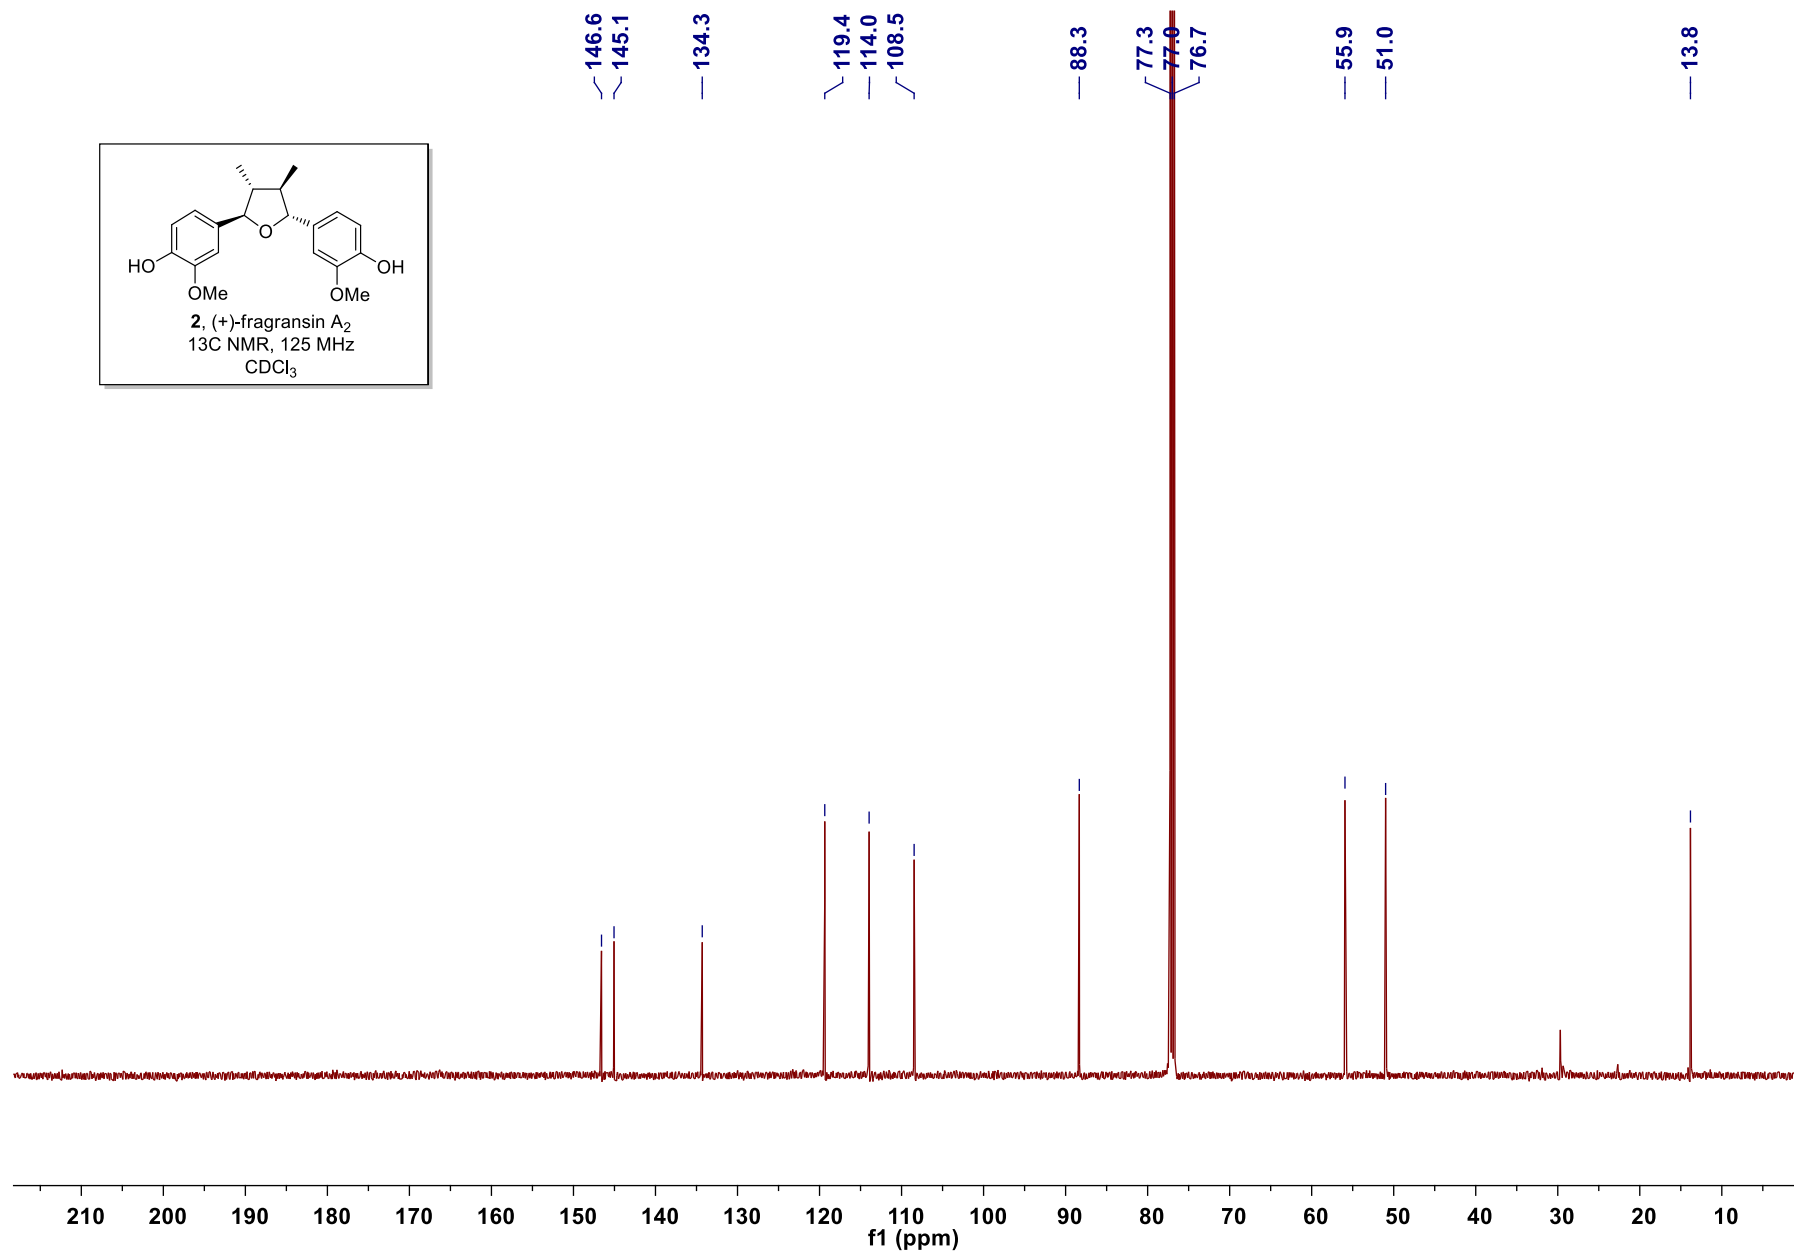

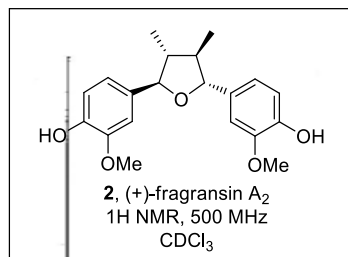

Hong's  
**synthetic (+)-fragransin A<sub>2</sub>**  
 (400 MHz, CDCl<sub>3</sub>)  
*Org. Lett.* **2007**, 9, 3965

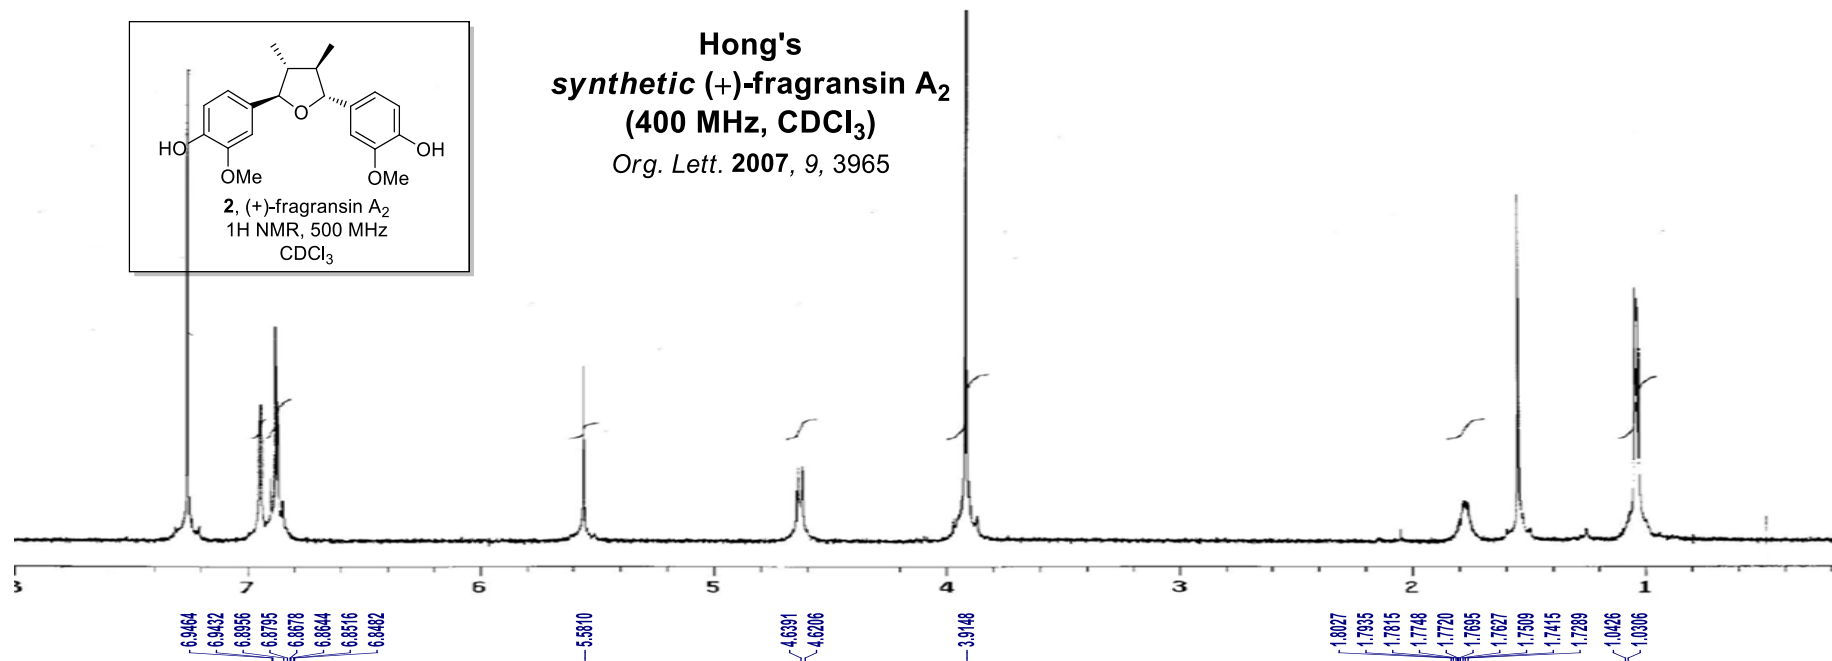

**Synthetic (+)-fragransin A<sub>2</sub>**  
 (500 MHz, CDCl<sub>3</sub>)

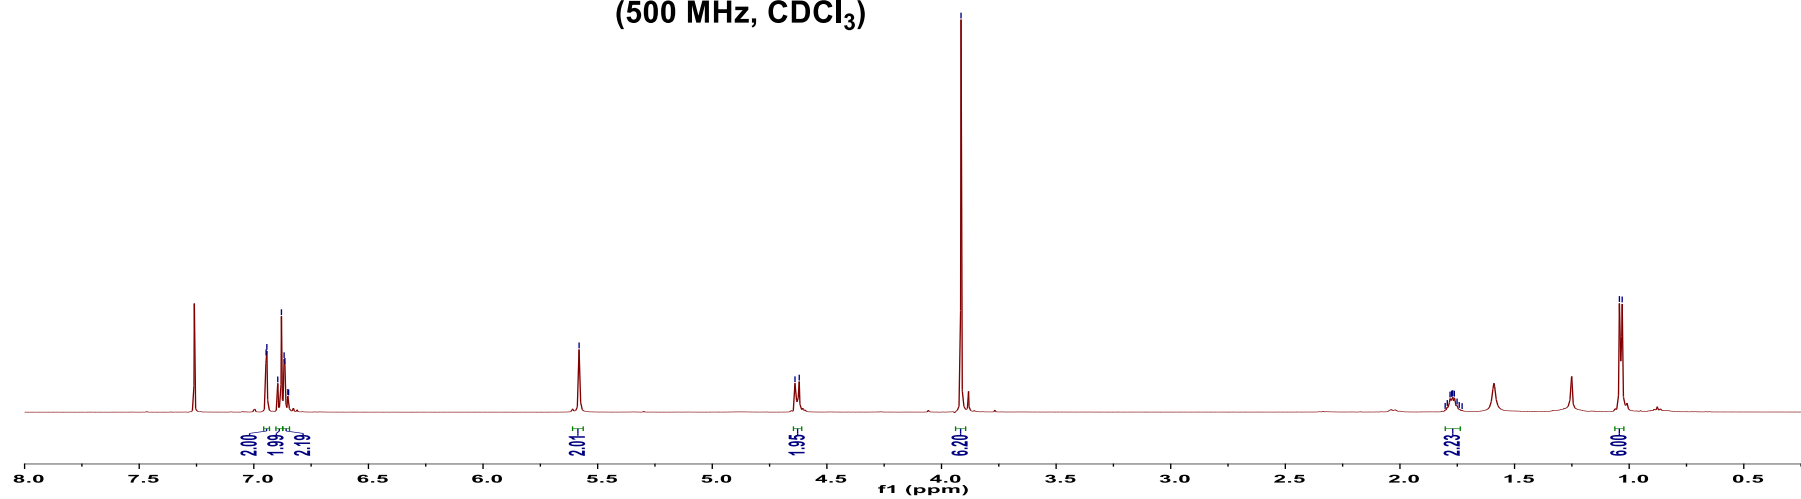



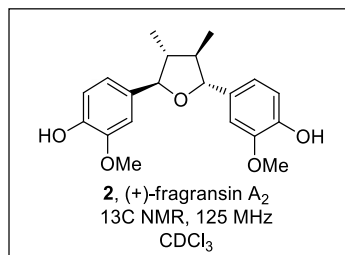

**Hong's**  
**synthetic (+)-fragransin A<sub>2</sub>**  
 (100 MHz, CDCl<sub>3</sub>)  
*Org. Lett.* 2007, 9, 3965

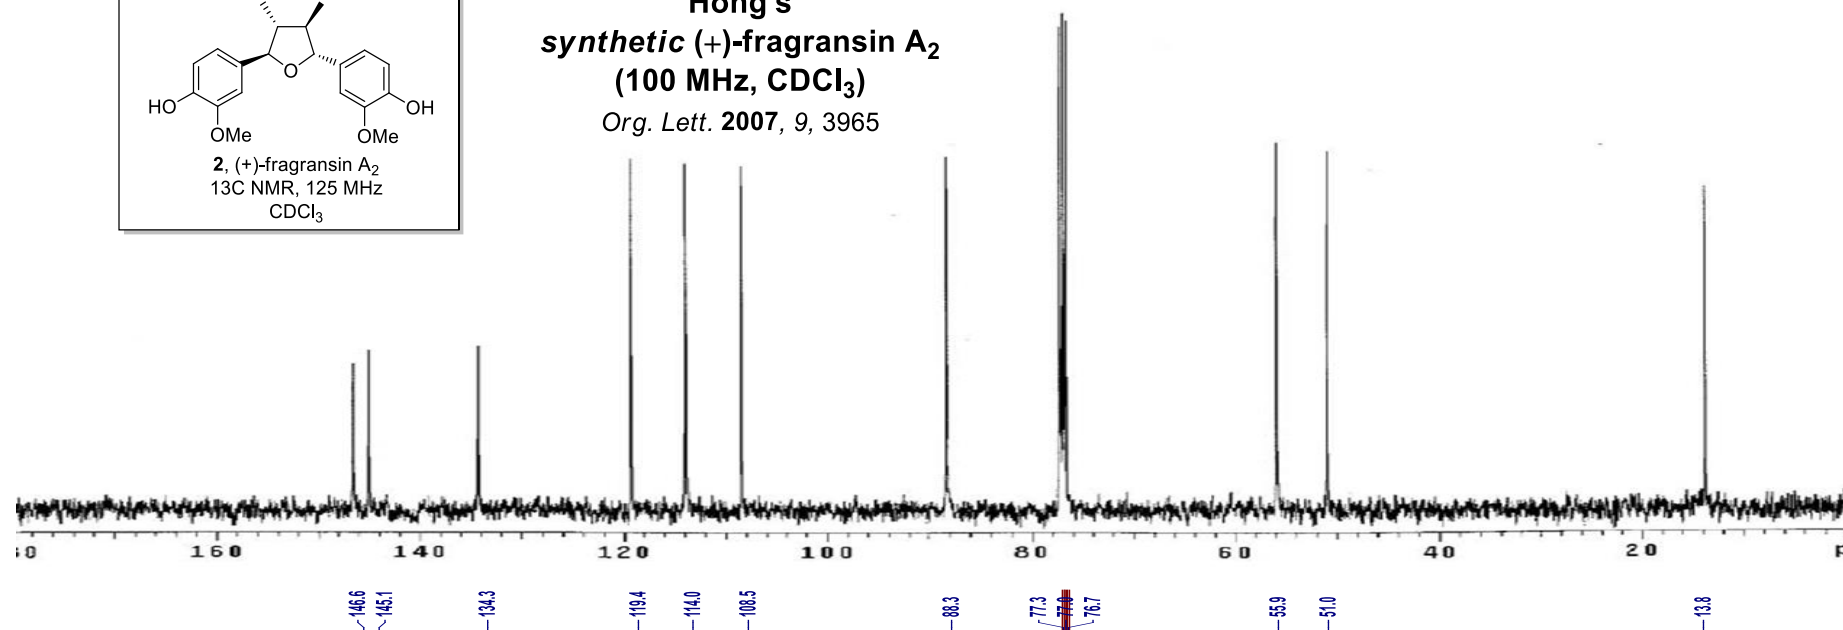

**Synthetic (+)-fragransin A<sub>2</sub>**  
 (125 MHz, CDCl<sub>3</sub>)

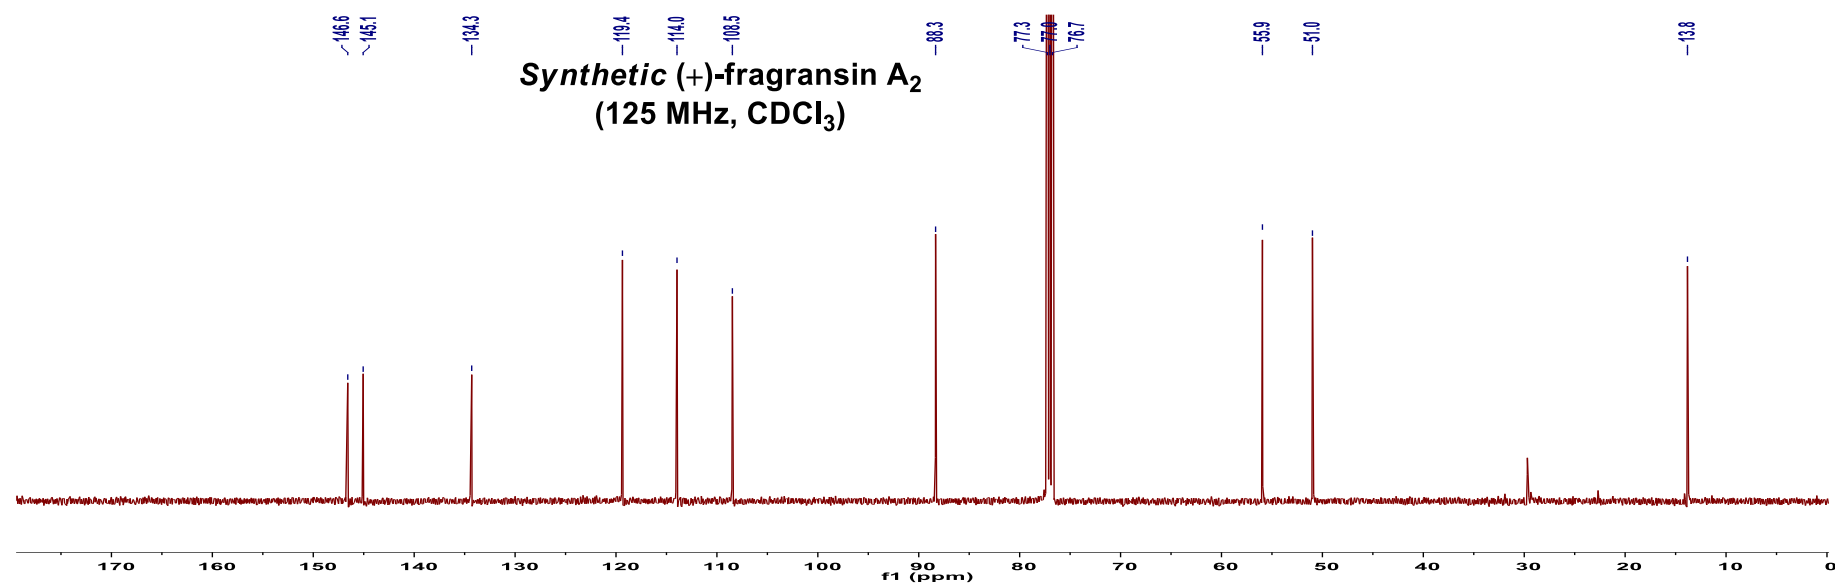

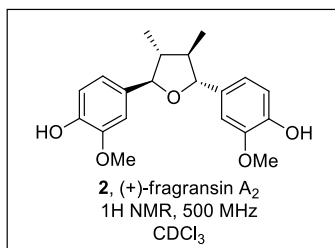

**Jahn's**  
**synthetic (+)-fragransin A<sub>2</sub>**  
 (400 MHz, CDCl<sub>3</sub>)  
*Org. Biomol. Chem.* **2018**, *16*, 750

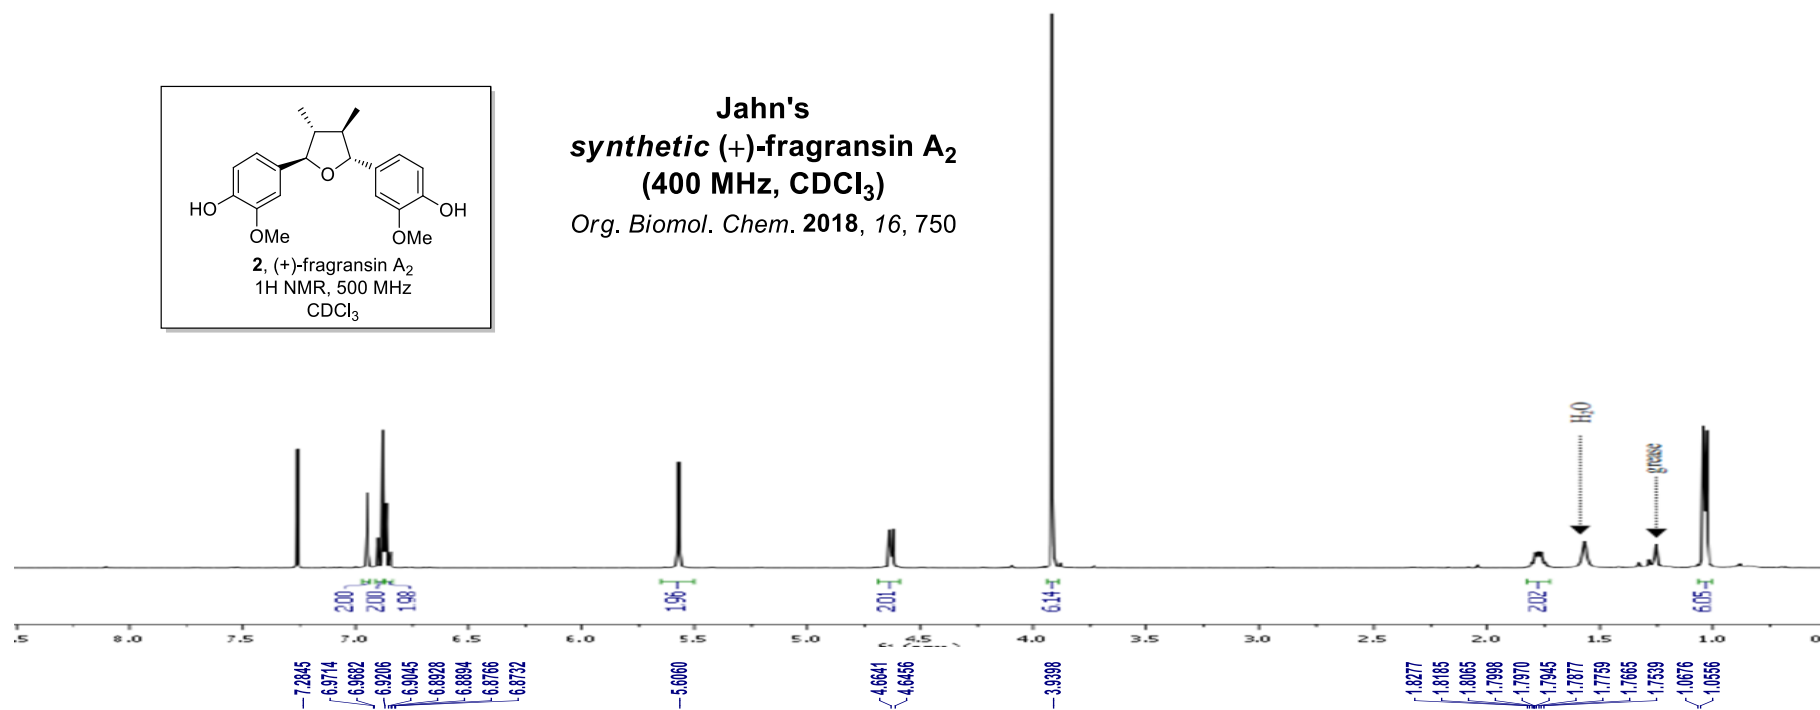

**Synthetic (+)-fragransin A<sub>2</sub>**  
 (500 MHz, CDCl<sub>3</sub>)

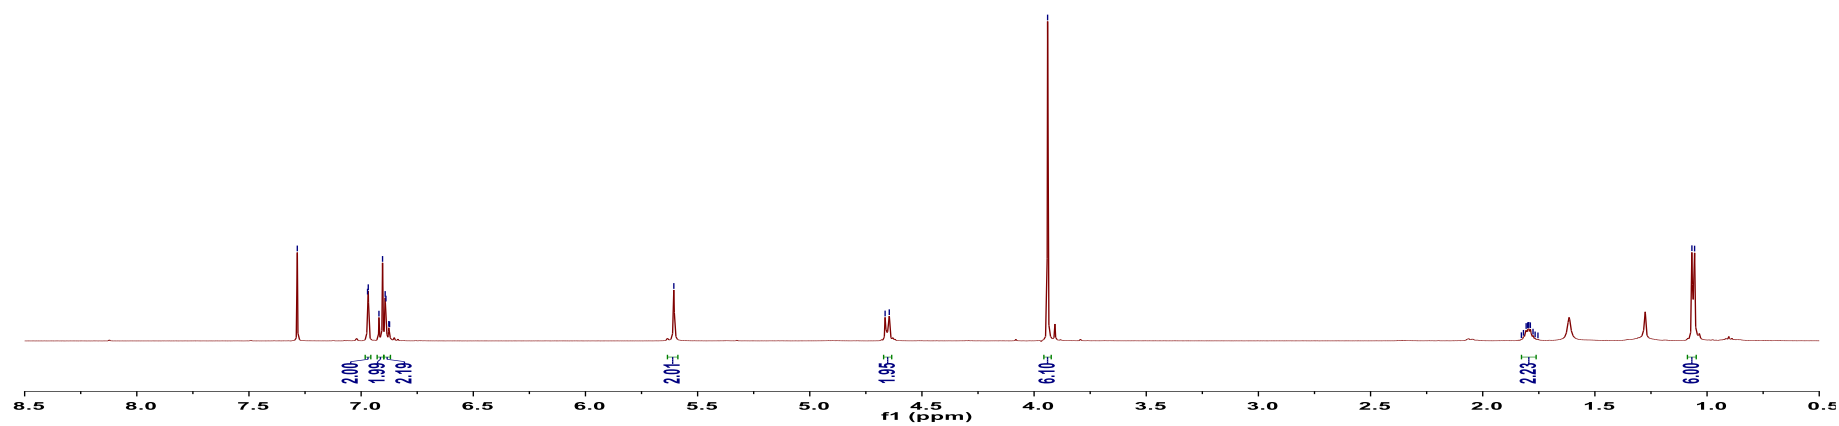

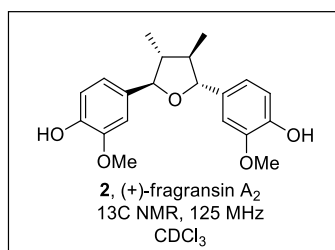

**Jahn's  
 synthetic (+)-fragransin A<sub>2</sub>  
 (100 MHz, CDCl<sub>3</sub>)**

*Org. Biomol. Chem.* **2018**, *16*, 750

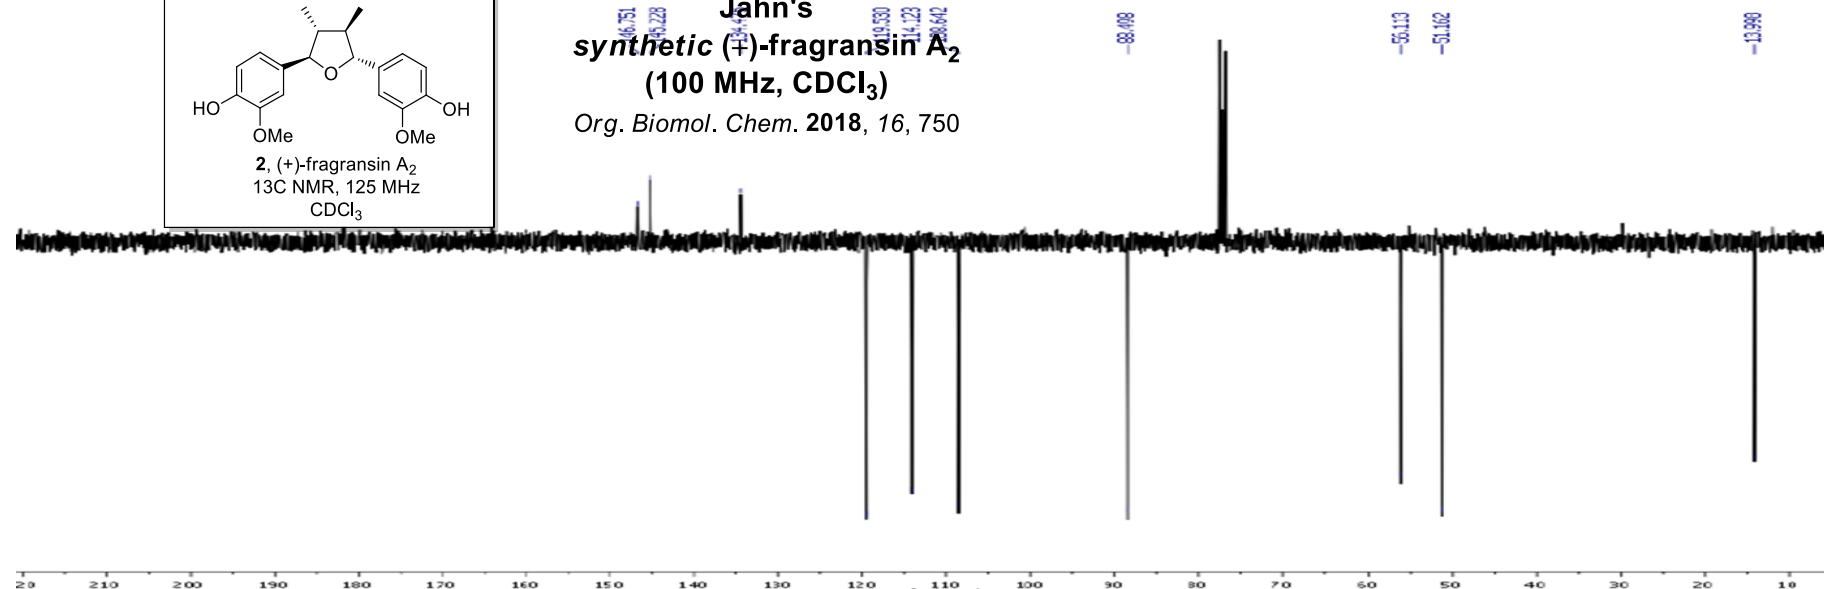

**Synthetic (+)-fragransin A<sub>2</sub>  
 (125 MHz, CDCl<sub>3</sub>)**

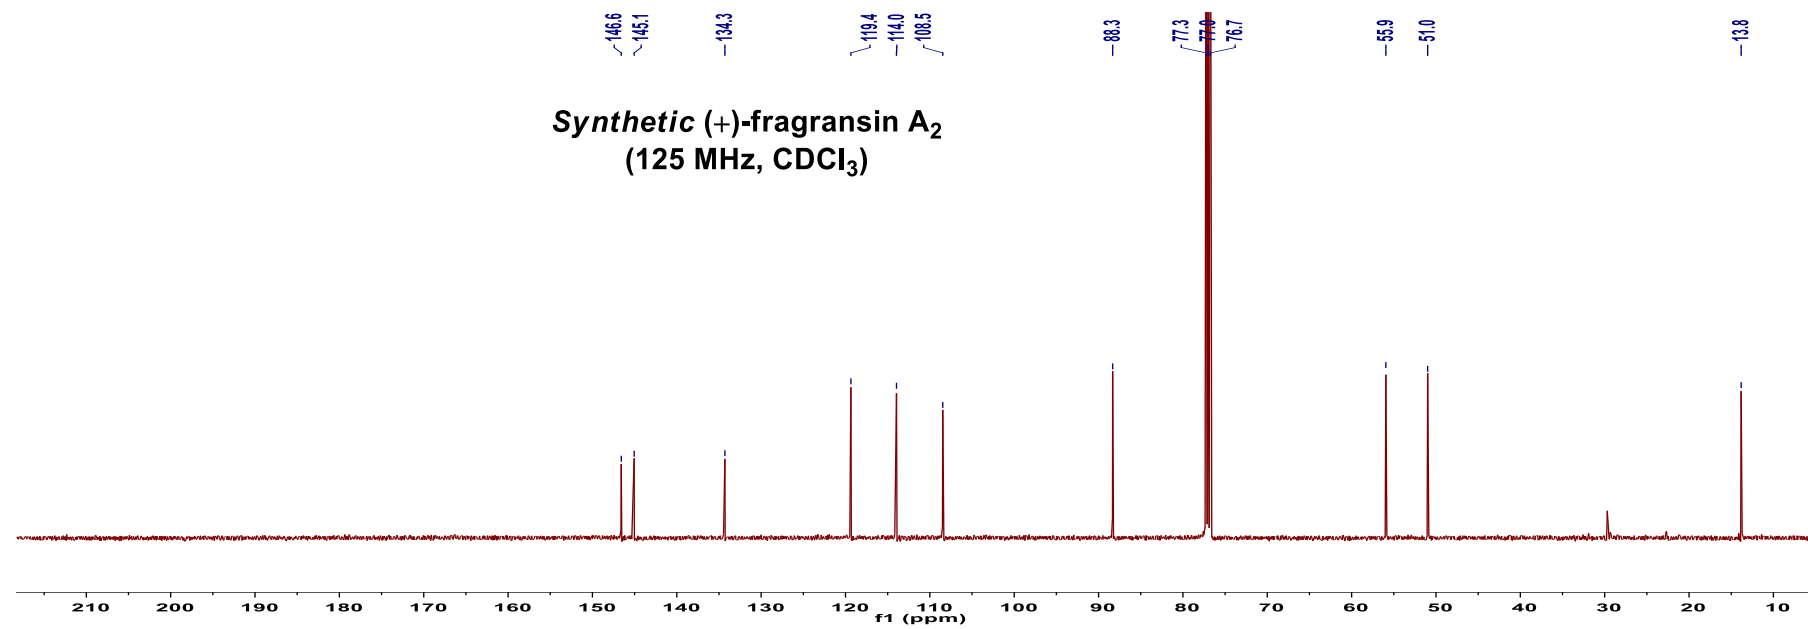

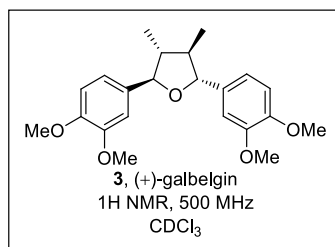

6.9663  
 6.9626  
 6.9293  
 6.9256  
 6.9129  
 6.9092  
 6.8524  
 6.8360

4.6688  
 4.6503

3.9127  
 3.8777

1.8364  
 1.8240  
 1.8146  
 1.8027  
 1.7958  
 1.7932  
 1.7906  
 1.7837  
 1.7719  
 1.7625  
 1.7501  
 1.0538  
 1.0418

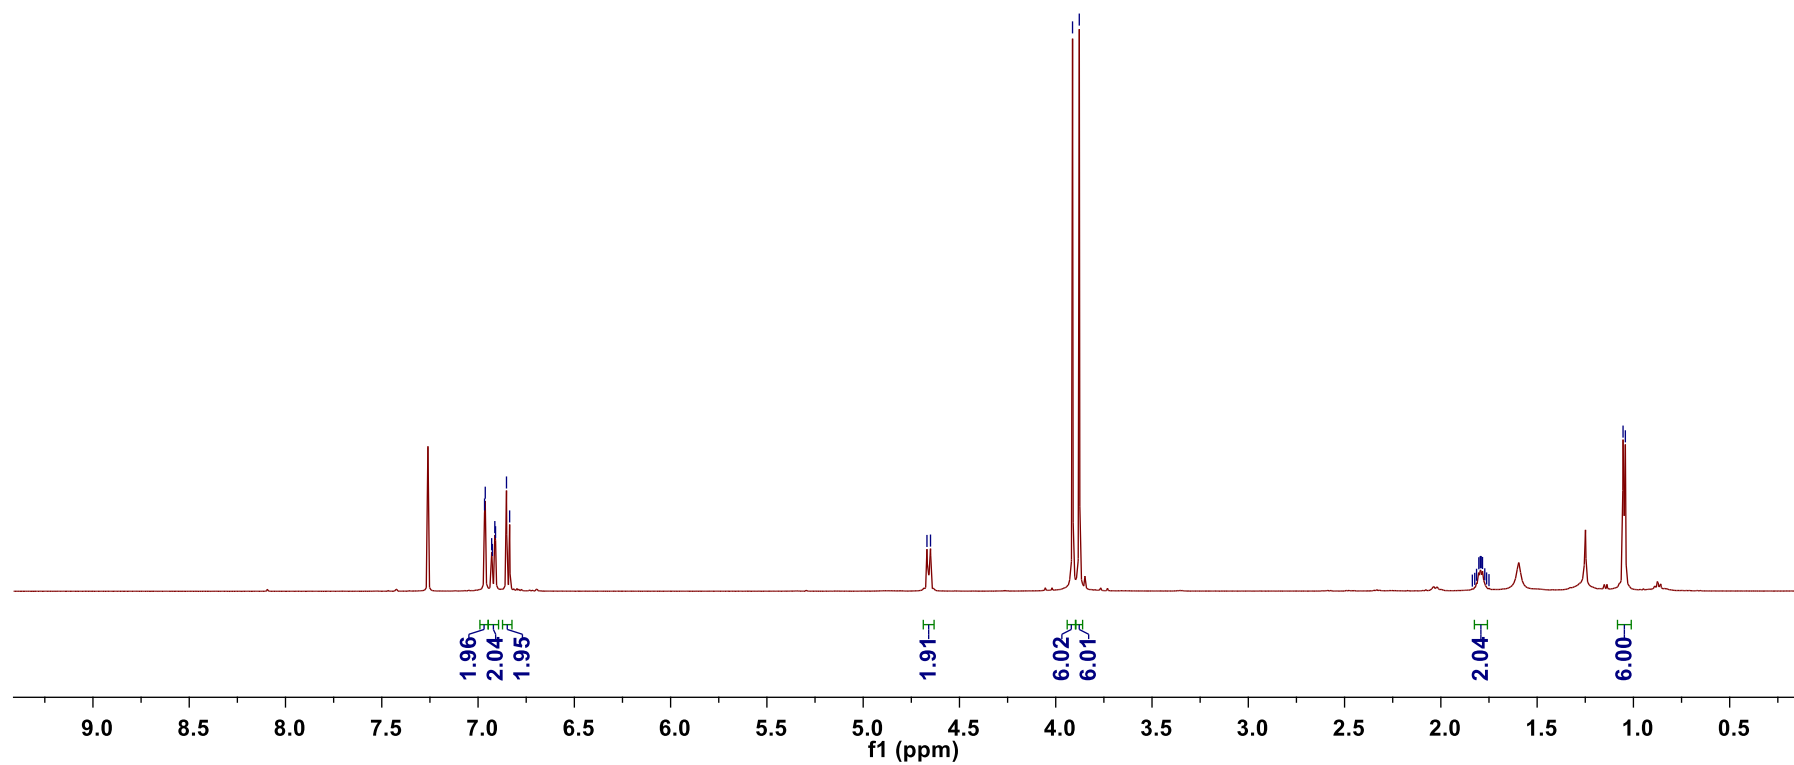

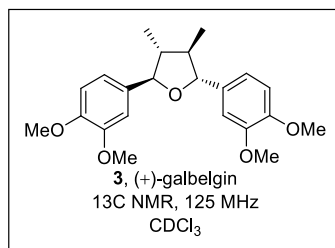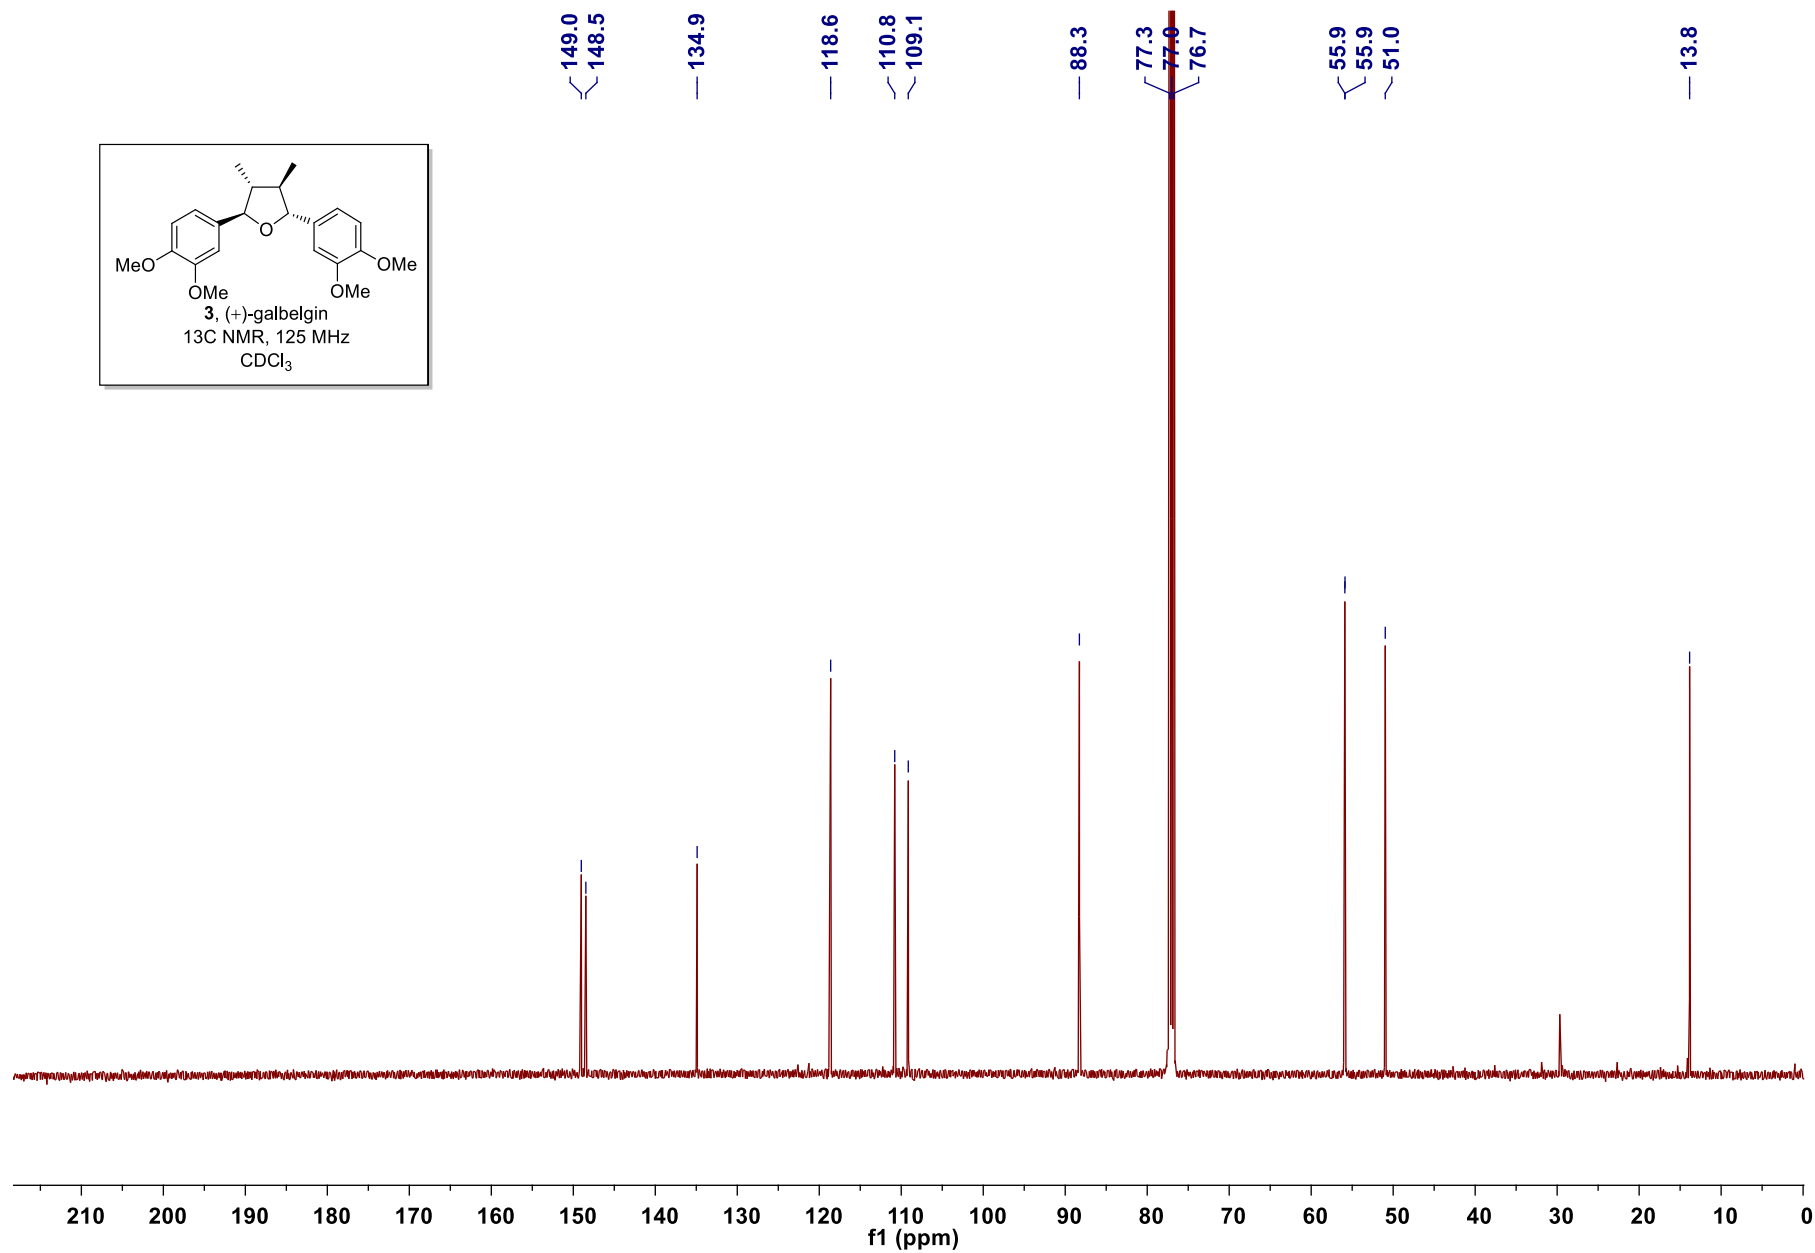

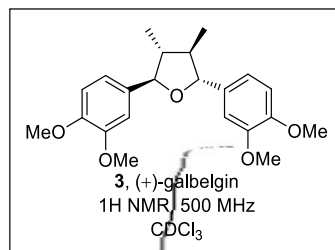

Jahn's  
 synthetic (±)-galbelgin  
 (400 MHz, -)

Org. Lett. 2006, 8, 4481

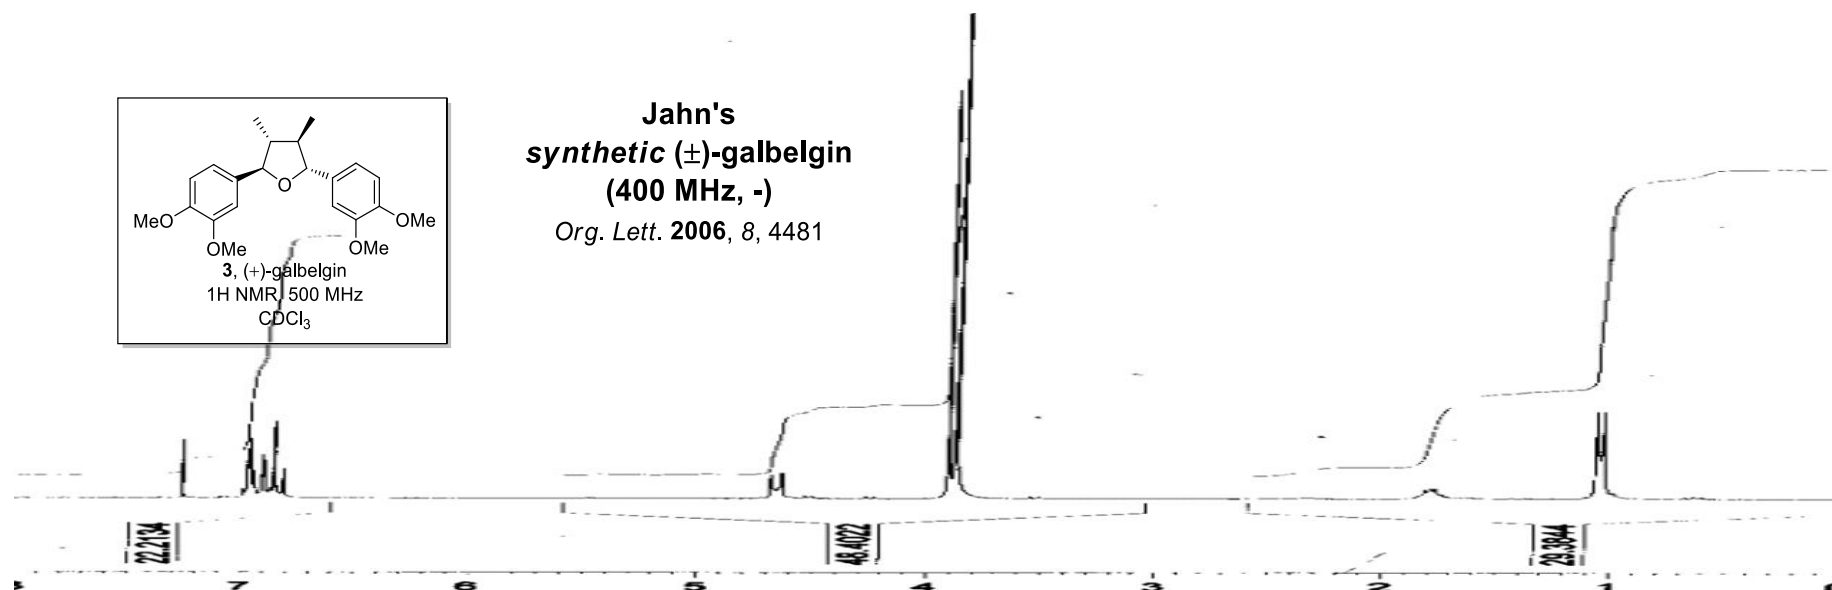

6.9663  
 6.9626  
 6.9293  
 6.9256  
 6.9129  
 6.9092  
 6.8524  
 6.8360

4.6688  
 4.6503

3.9127  
 3.8777

1.8364  
 1.8240  
 1.8146  
 1.8027  
 1.7958  
 1.7932  
 1.7906  
 1.7837  
 1.7719  
 1.7625  
 1.7501  
 1.0538  
 1.0418

Synthetic (+)-galbelgin  
 (500 MHz, CDCl<sub>3</sub>)

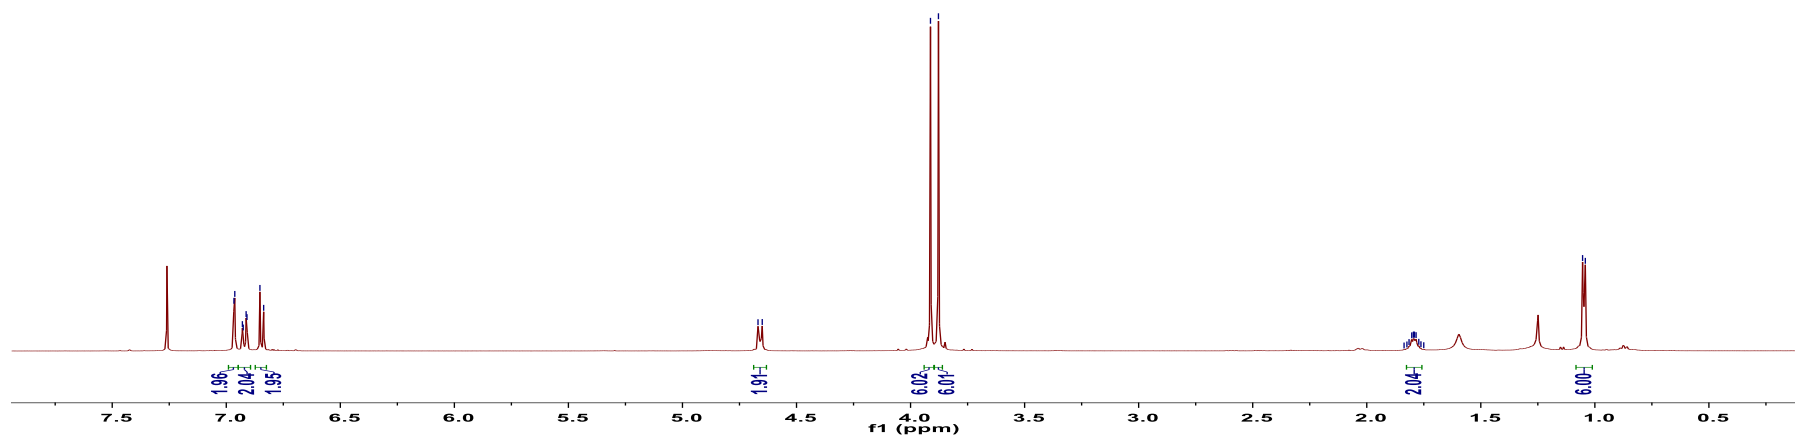

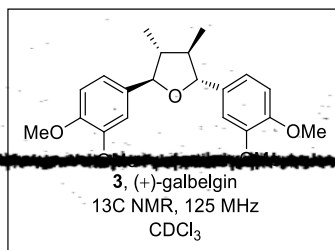

Jahn's  
**synthetic (±)-galbelgin**  
(100 MHz, -)  
*Org. Lett.* 2006, 8, 4481

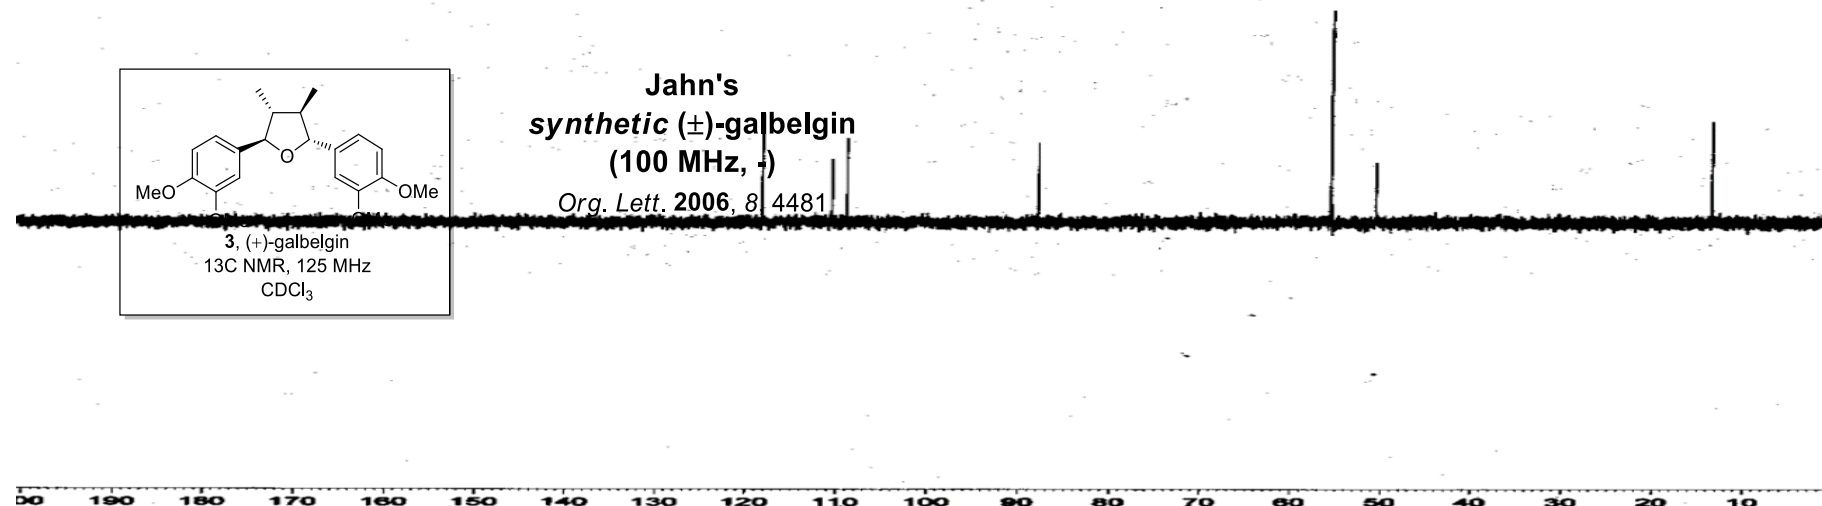

149.0  
148.5

134.9

118.6

110.8

109.1

88.3

77.3

77.0

76.7

55.9

55.9

51.0

13.8

**Synthetic (+)-galbelgin**  
(125 MHz, CDCl<sub>3</sub>)

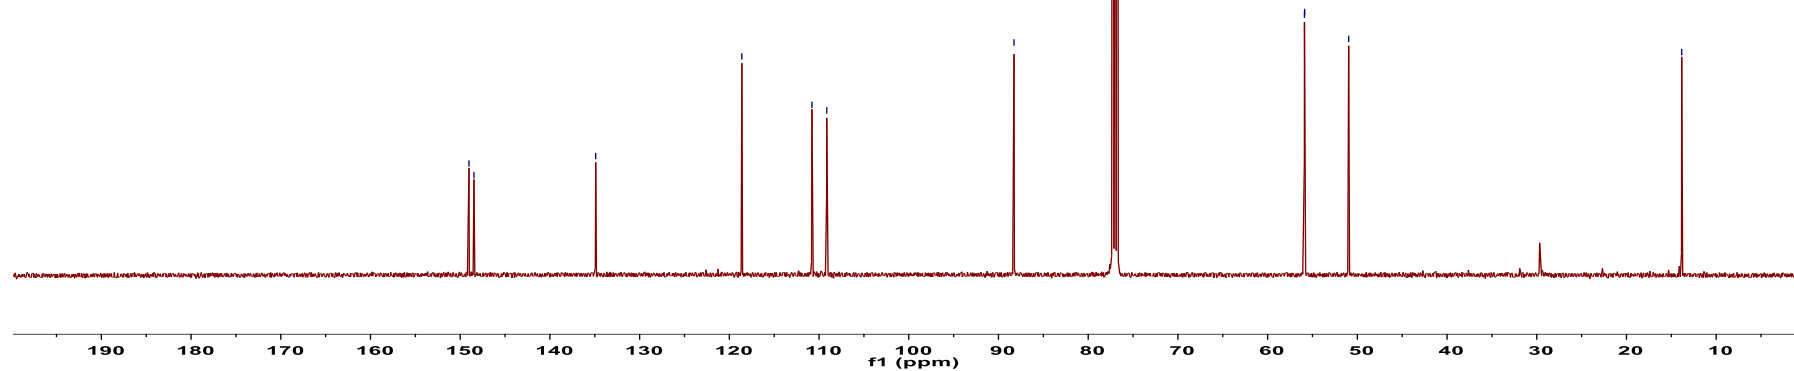

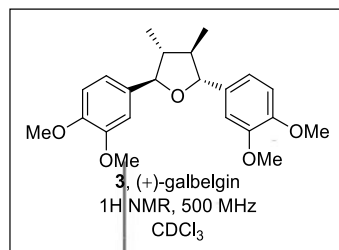

Hong's  
**synthetic (+)-galbelgin**  
 (400 MHz, CDCl<sub>3</sub>)  
*Org. Lett.* 2007, 9, 3965

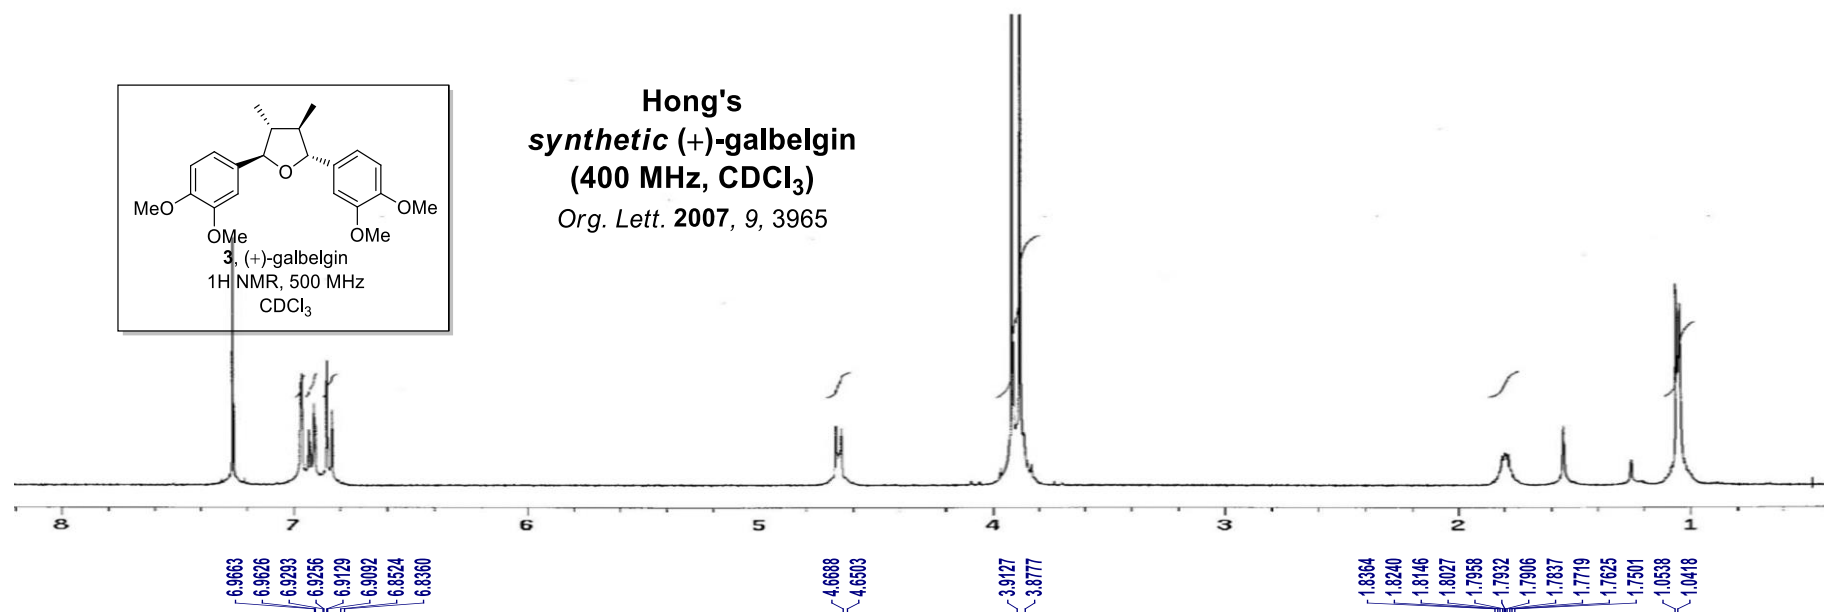

**Synthetic (+)-galbelgin**  
 (500 MHz, CDCl<sub>3</sub>)

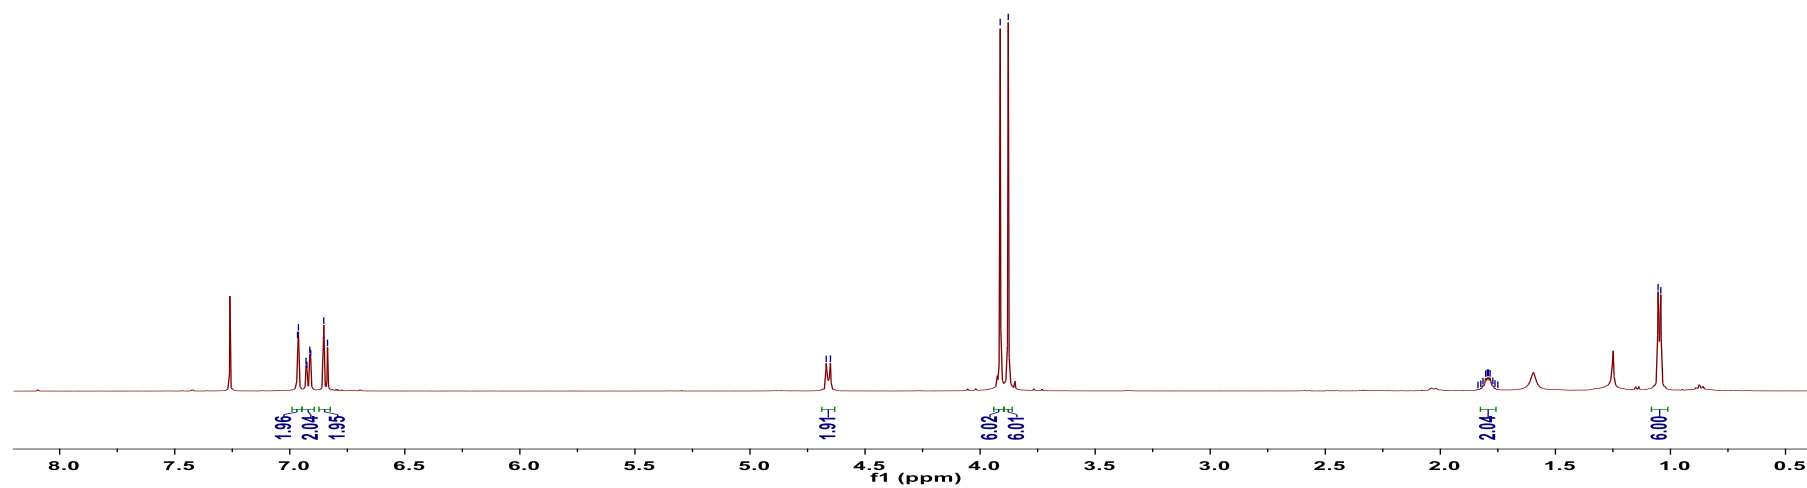



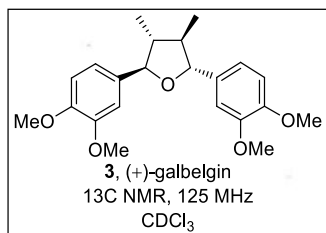

**Hong's**  
**synthetic (+)-galbelgin**  
**(100 MHz, CDCl<sub>3</sub>)**  
*Org. Lett.* 2007, 9, 3965

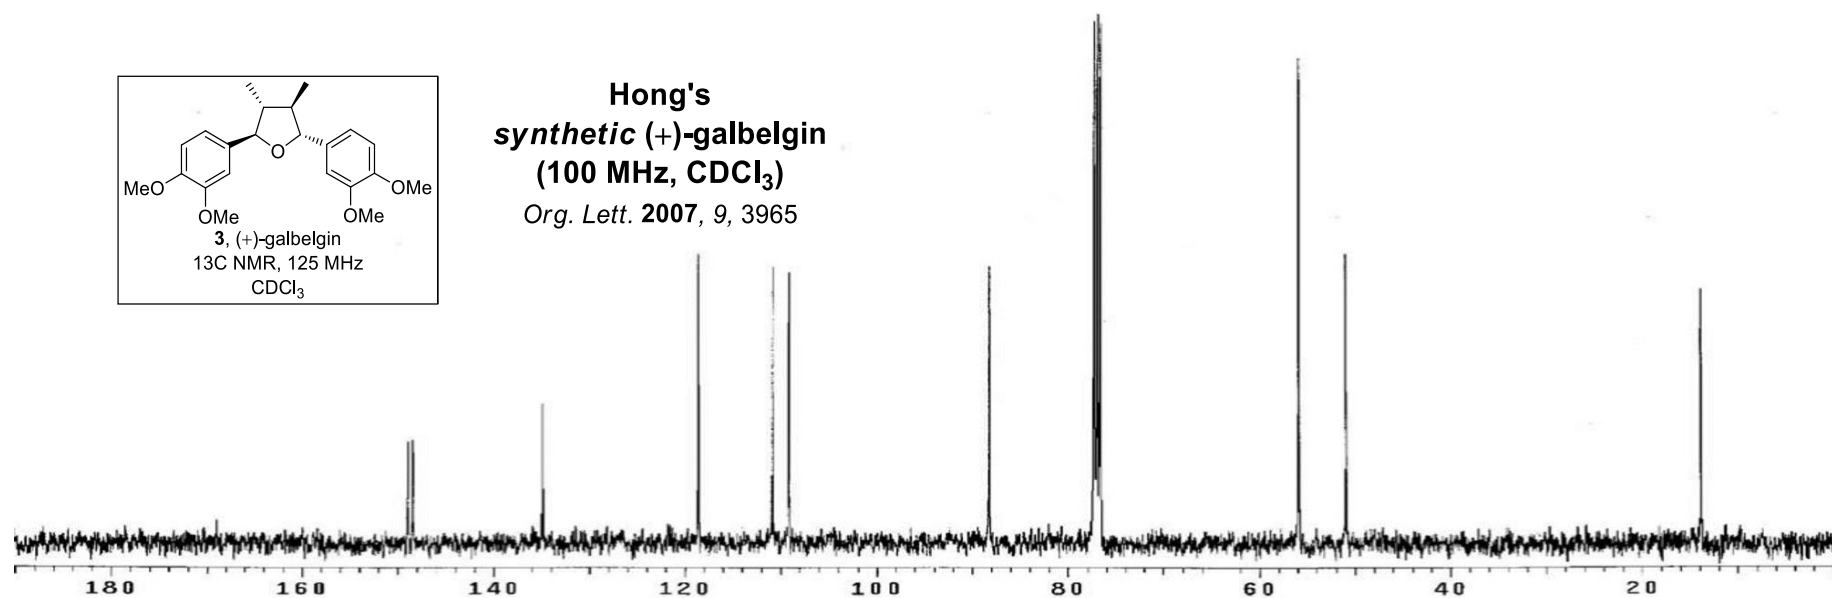

**Synthetic (+)-galbelgin**  
**(125 MHz, CDCl<sub>3</sub>)**

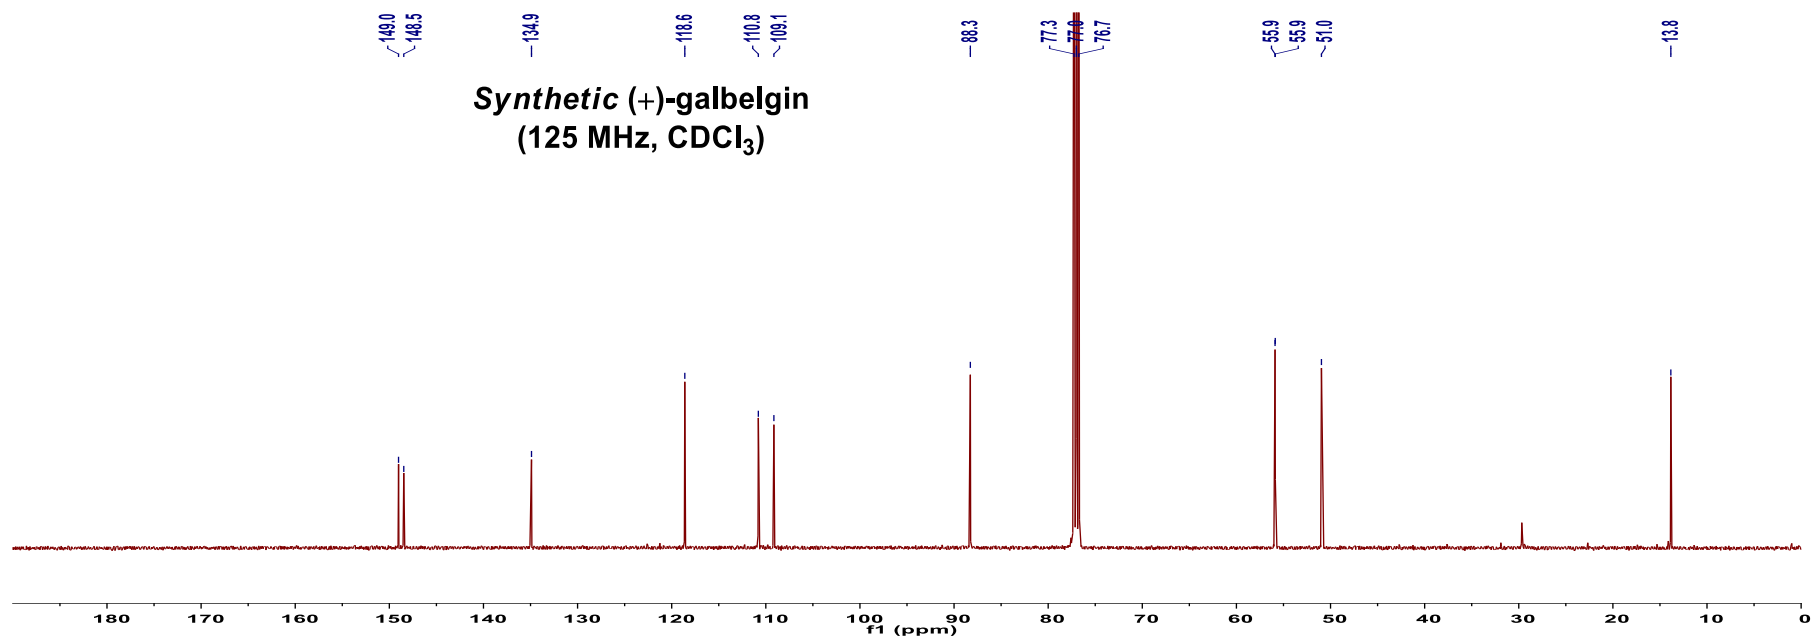

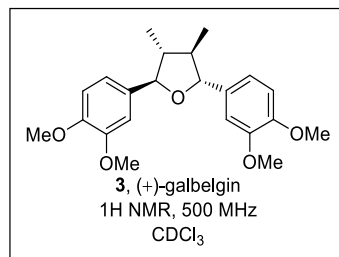

**Rye's  
synthetic (+)-galbelgin  
(400 MHz, CDCl<sub>3</sub>)**

*J. Org. Chem.* **2011**, *76*, 6636

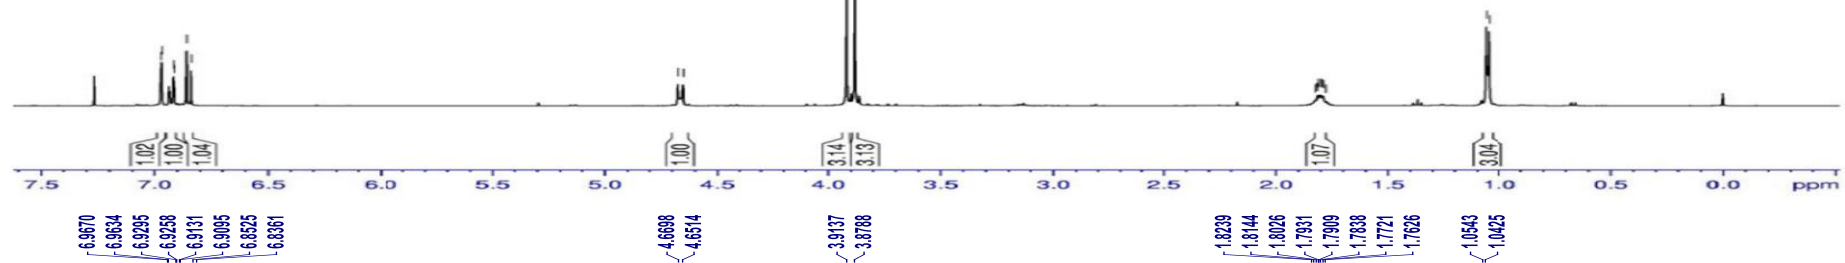

**Synthetic (+)-galbelgin  
(500 MHz, CDCl<sub>3</sub>)**

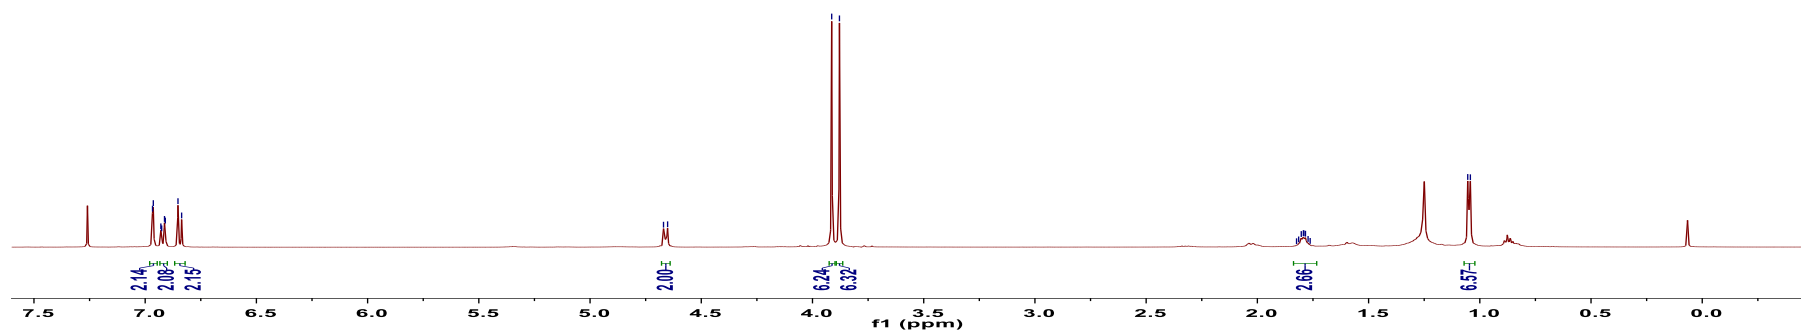

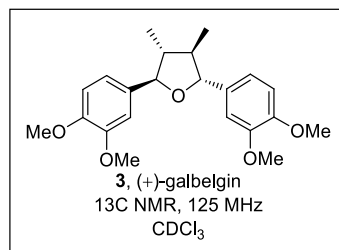

Rye's  
**synthetic (+)-galbelgin**  
 (100 MHz, CDCl<sub>3</sub>)  
*J. Org. Chem.* **2011**, *76*, 6636

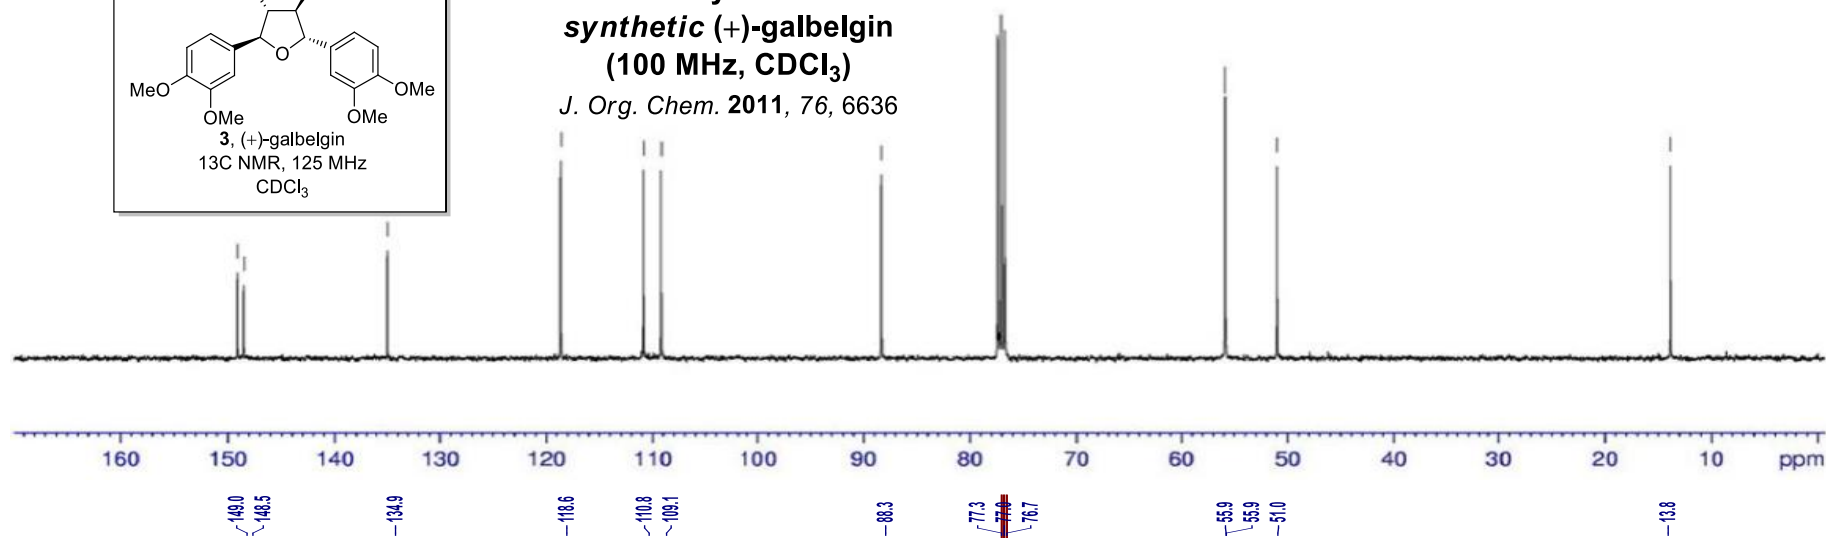

**Synthetic (+)-galbelgin**  
 (125 MHz, CDCl<sub>3</sub>)

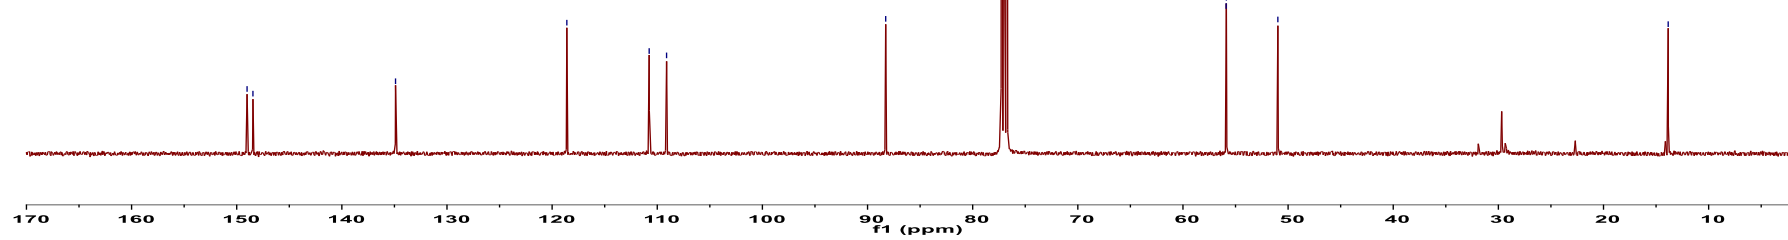

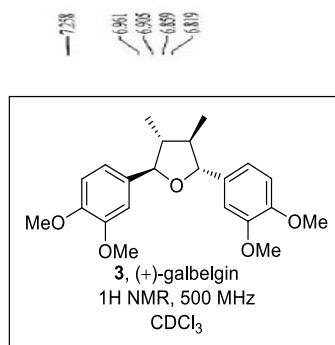

**Hajra's**  
**synthetic (+)-galbelgin**  
**(200 MHz, CDCl<sub>3</sub>)**  
*RSC Adv.* **2013**, *3*, 22834

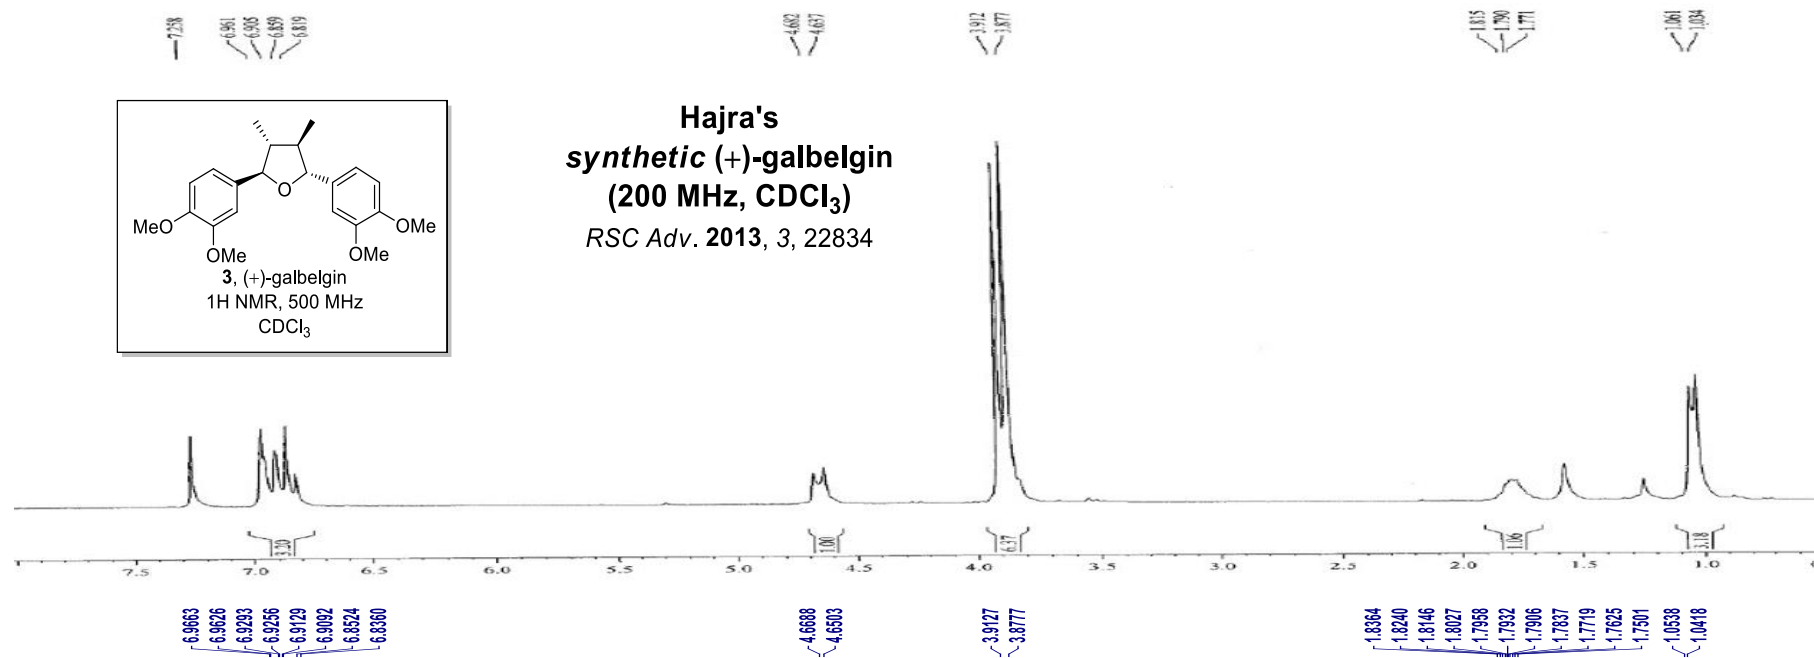

**Synthetic (+)-galbelgin**  
**(500 MHz, CDCl<sub>3</sub>)**

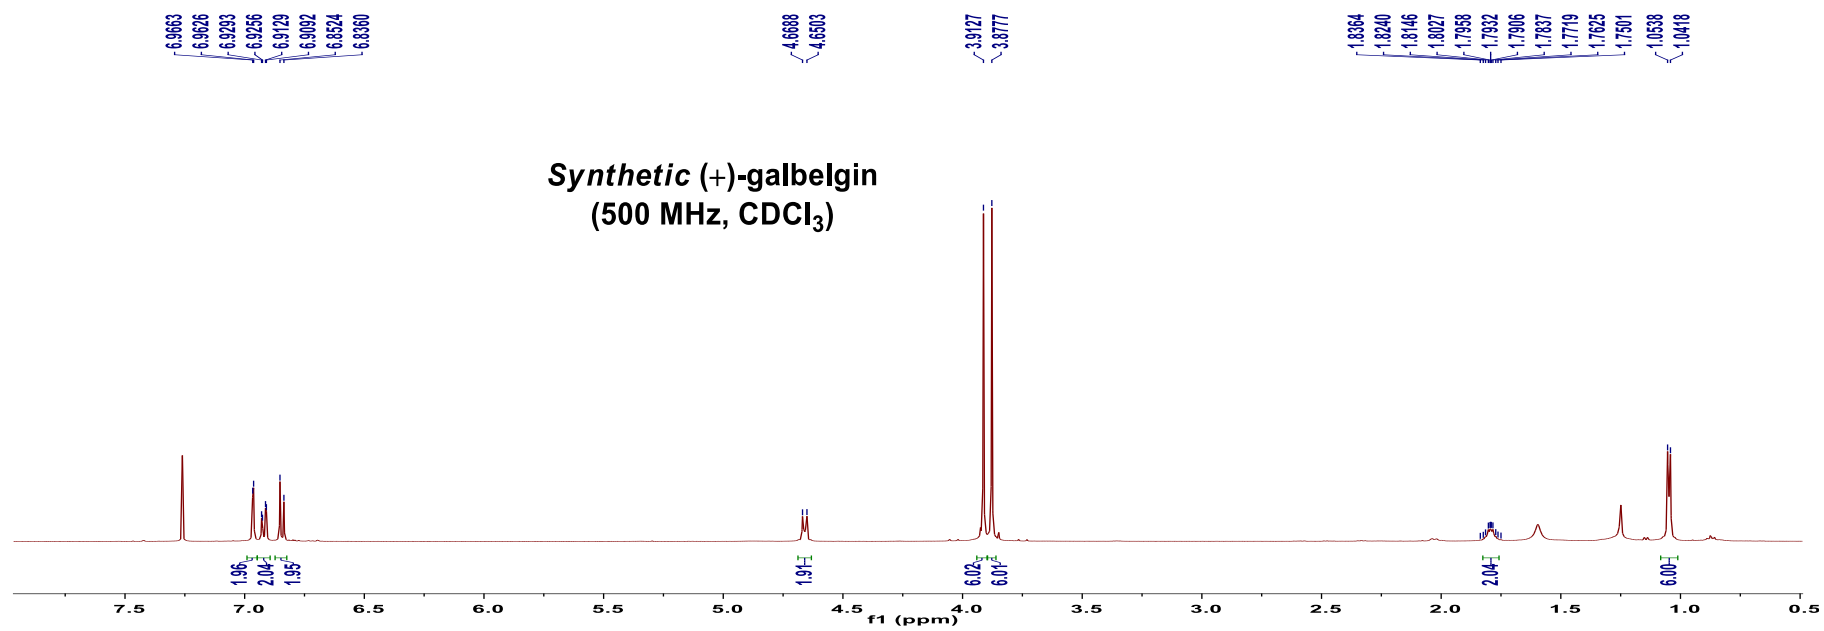

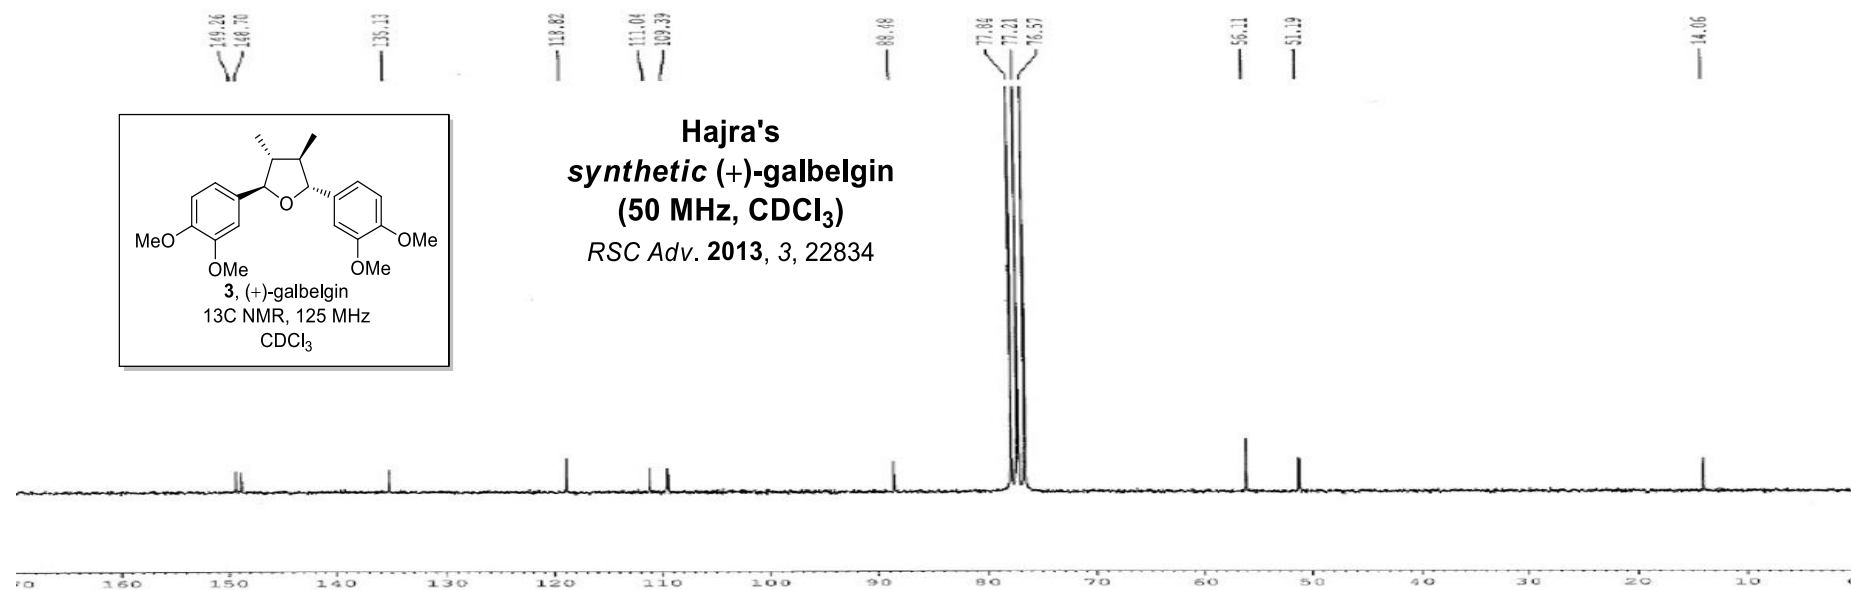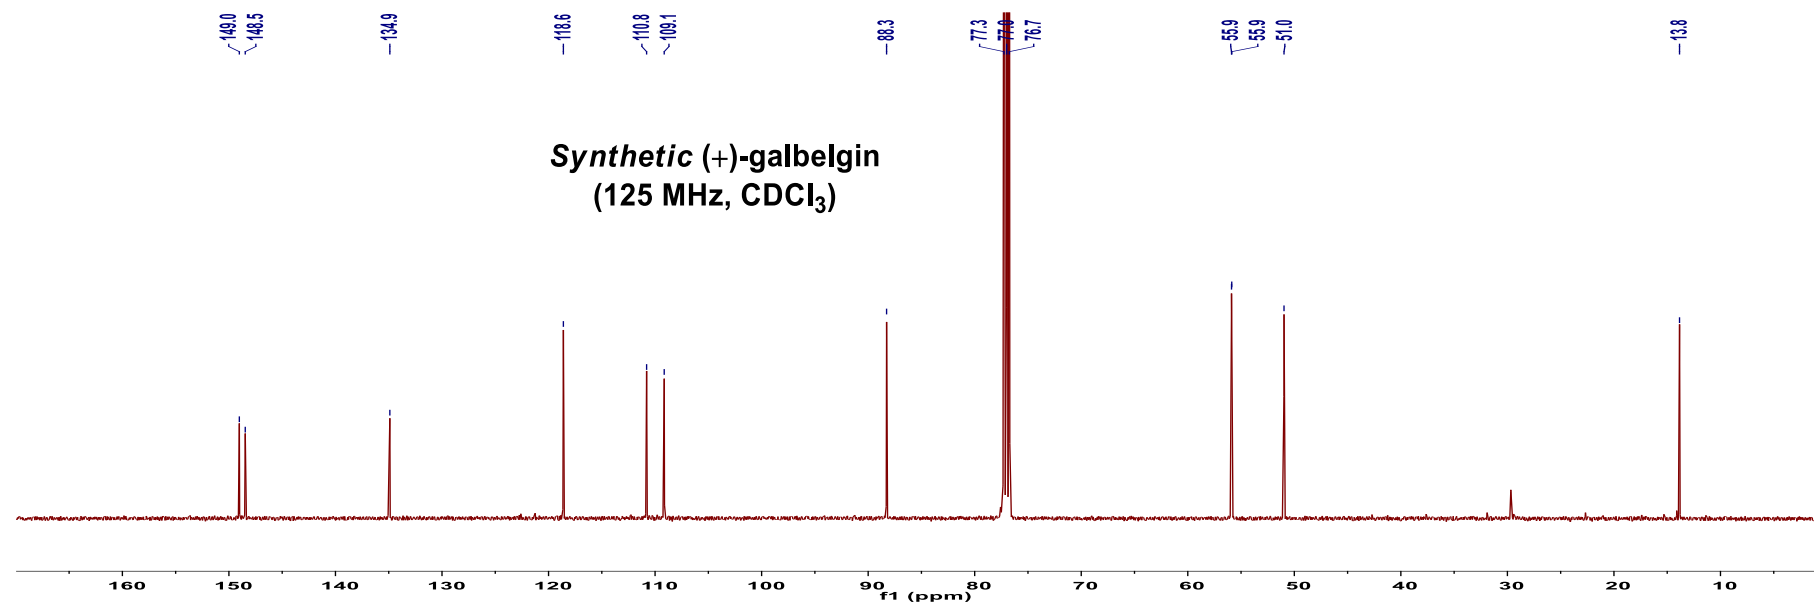

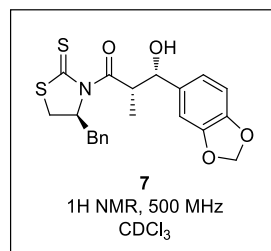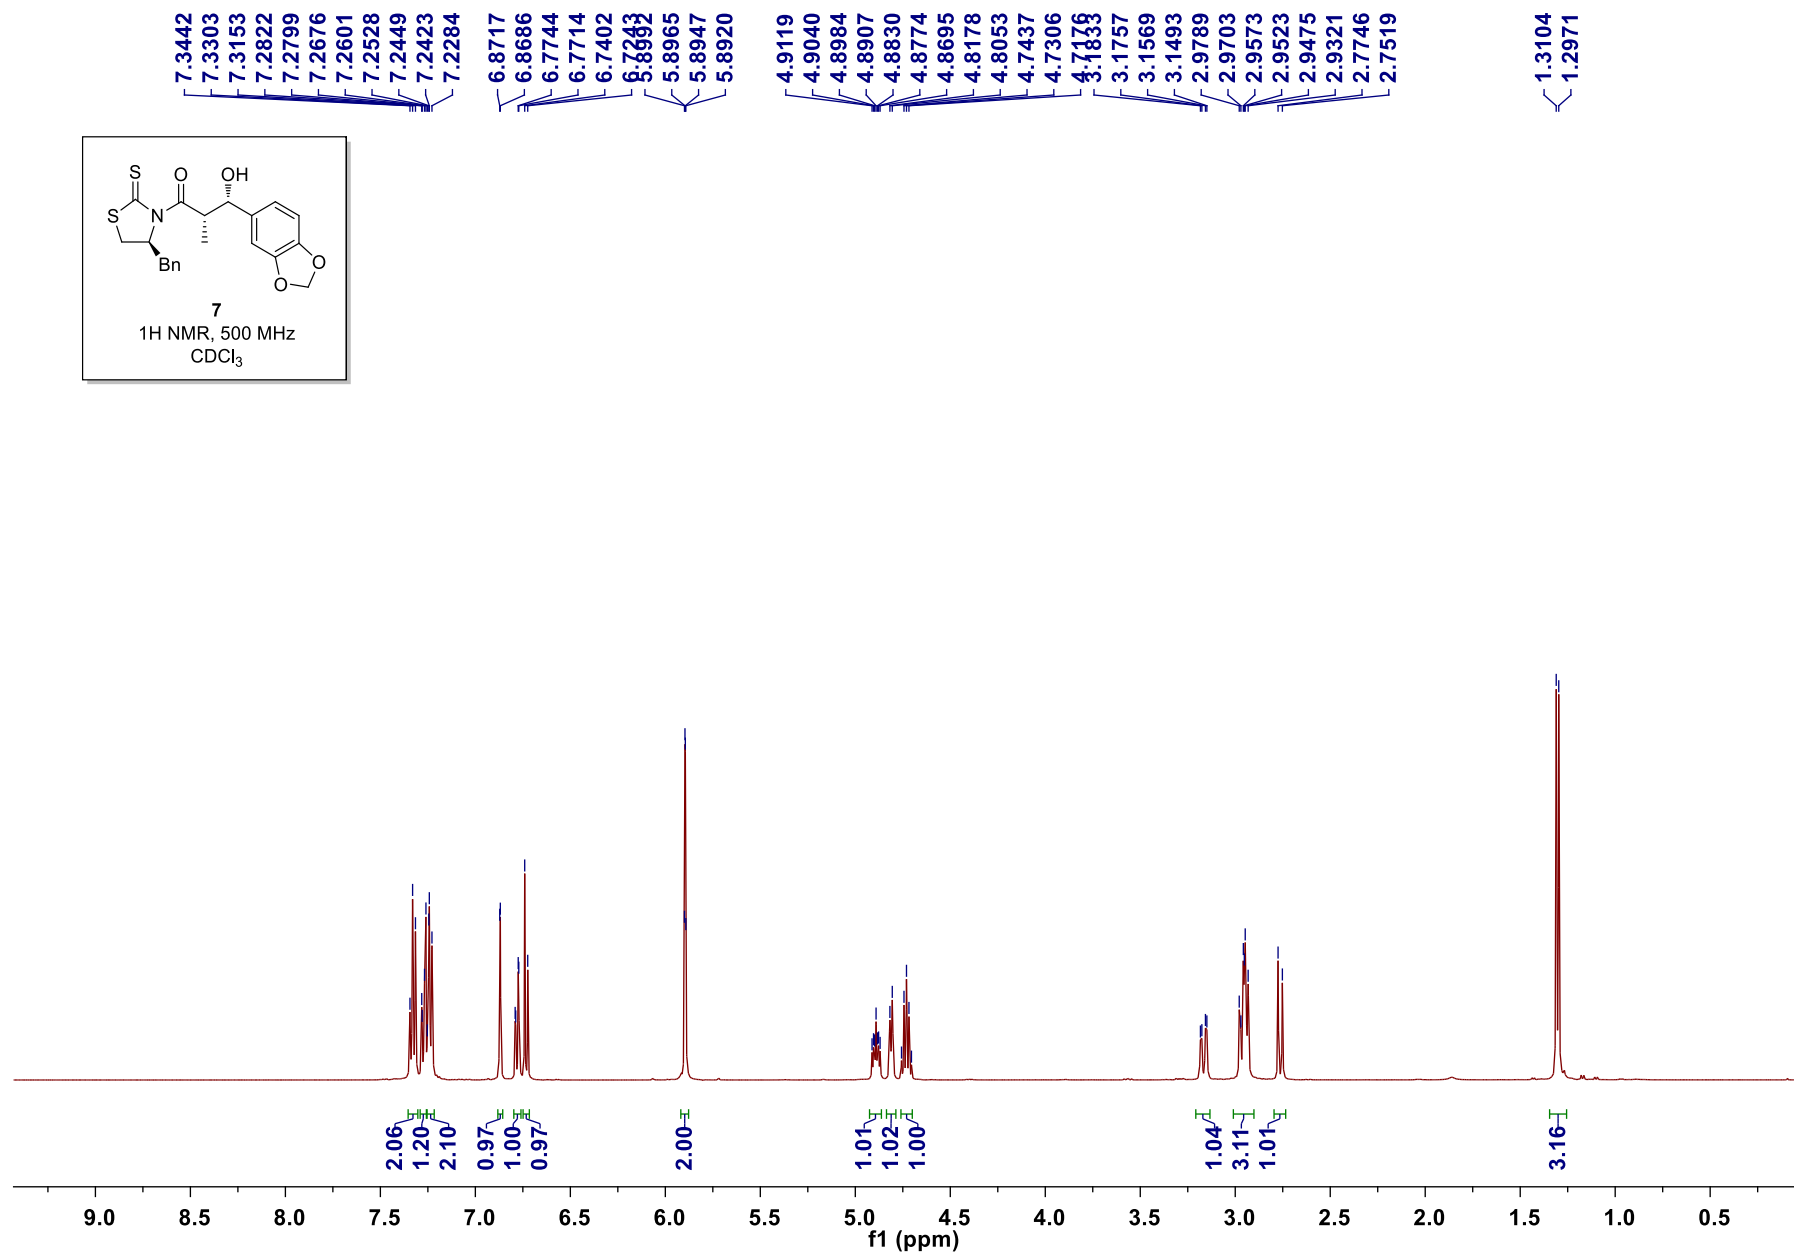

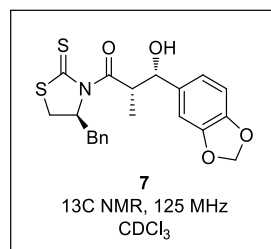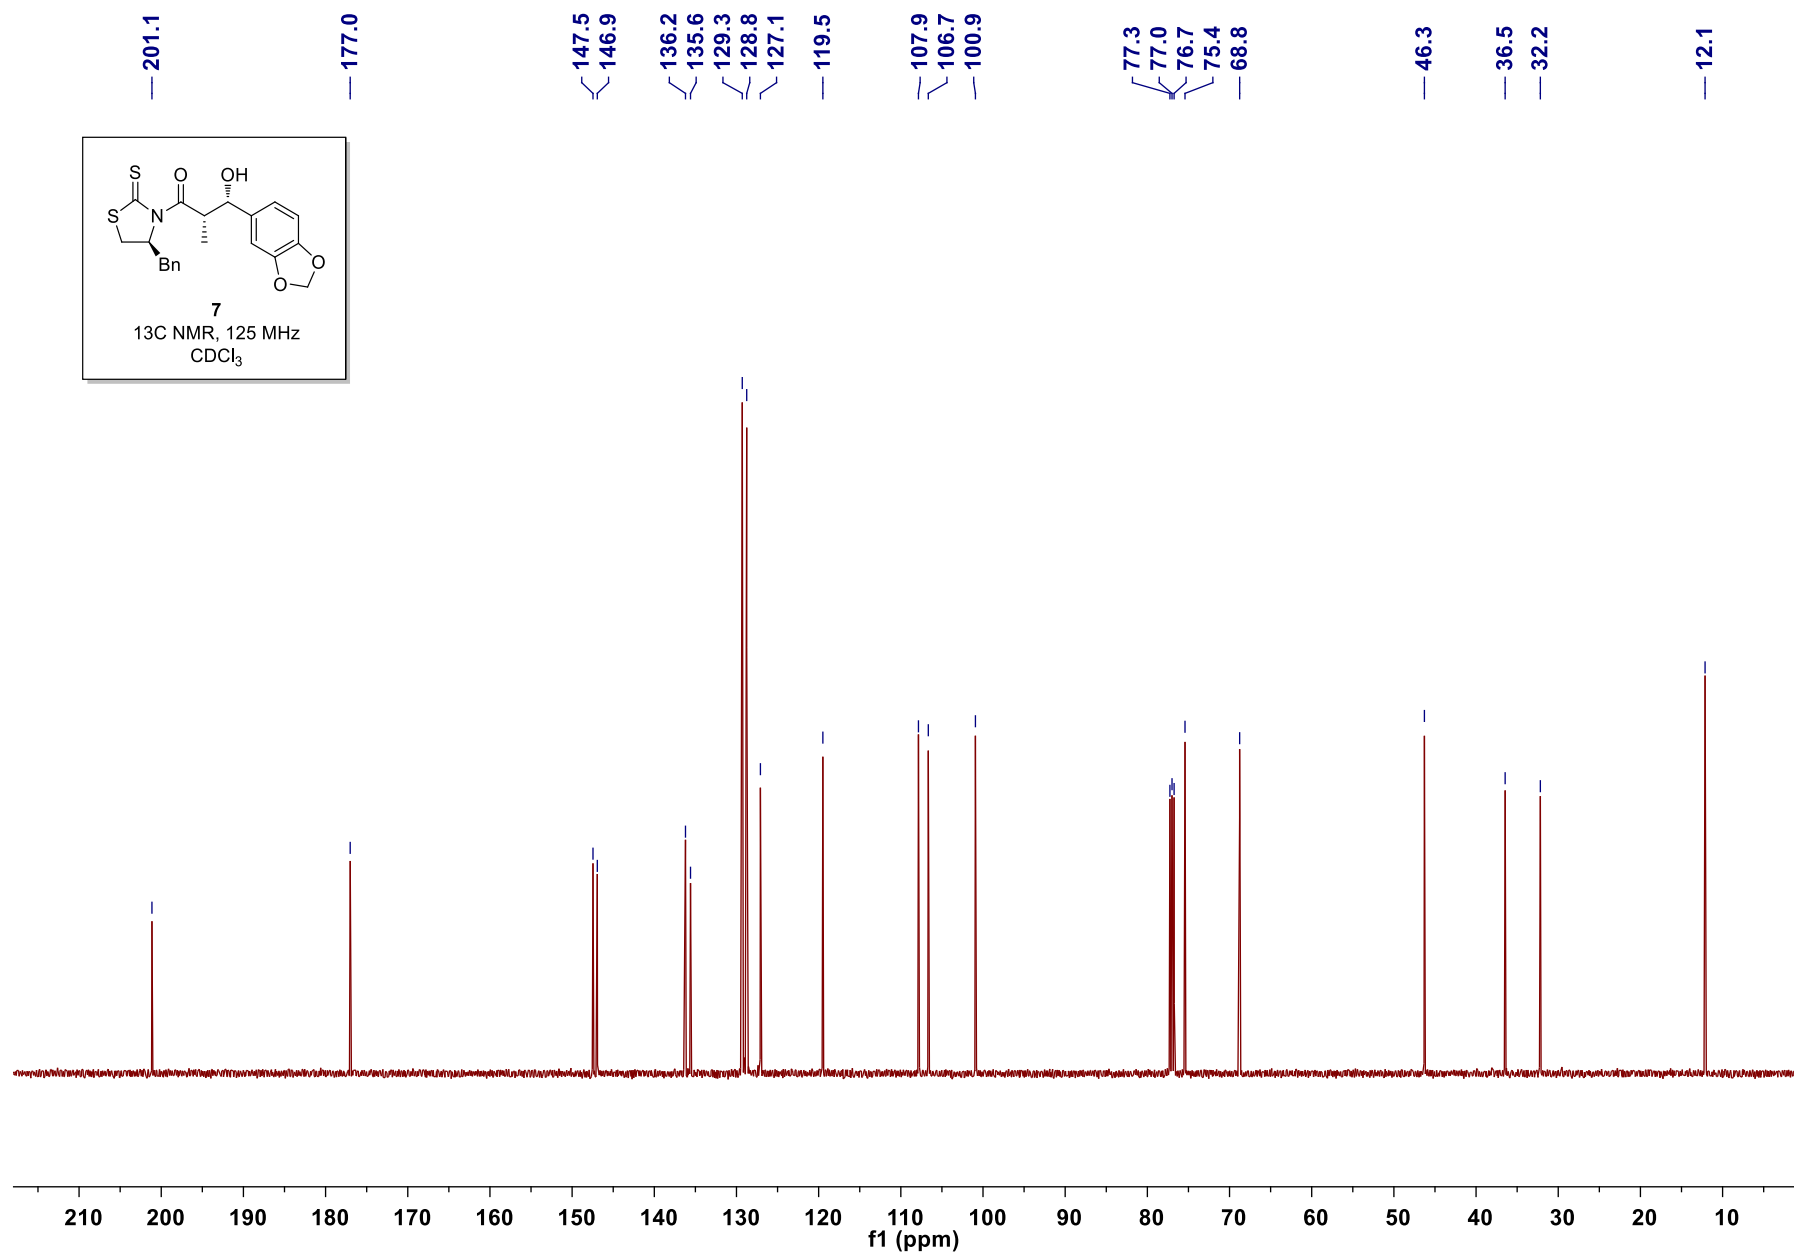

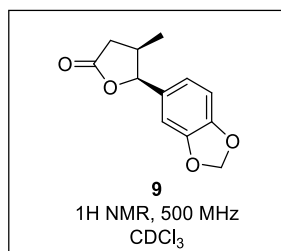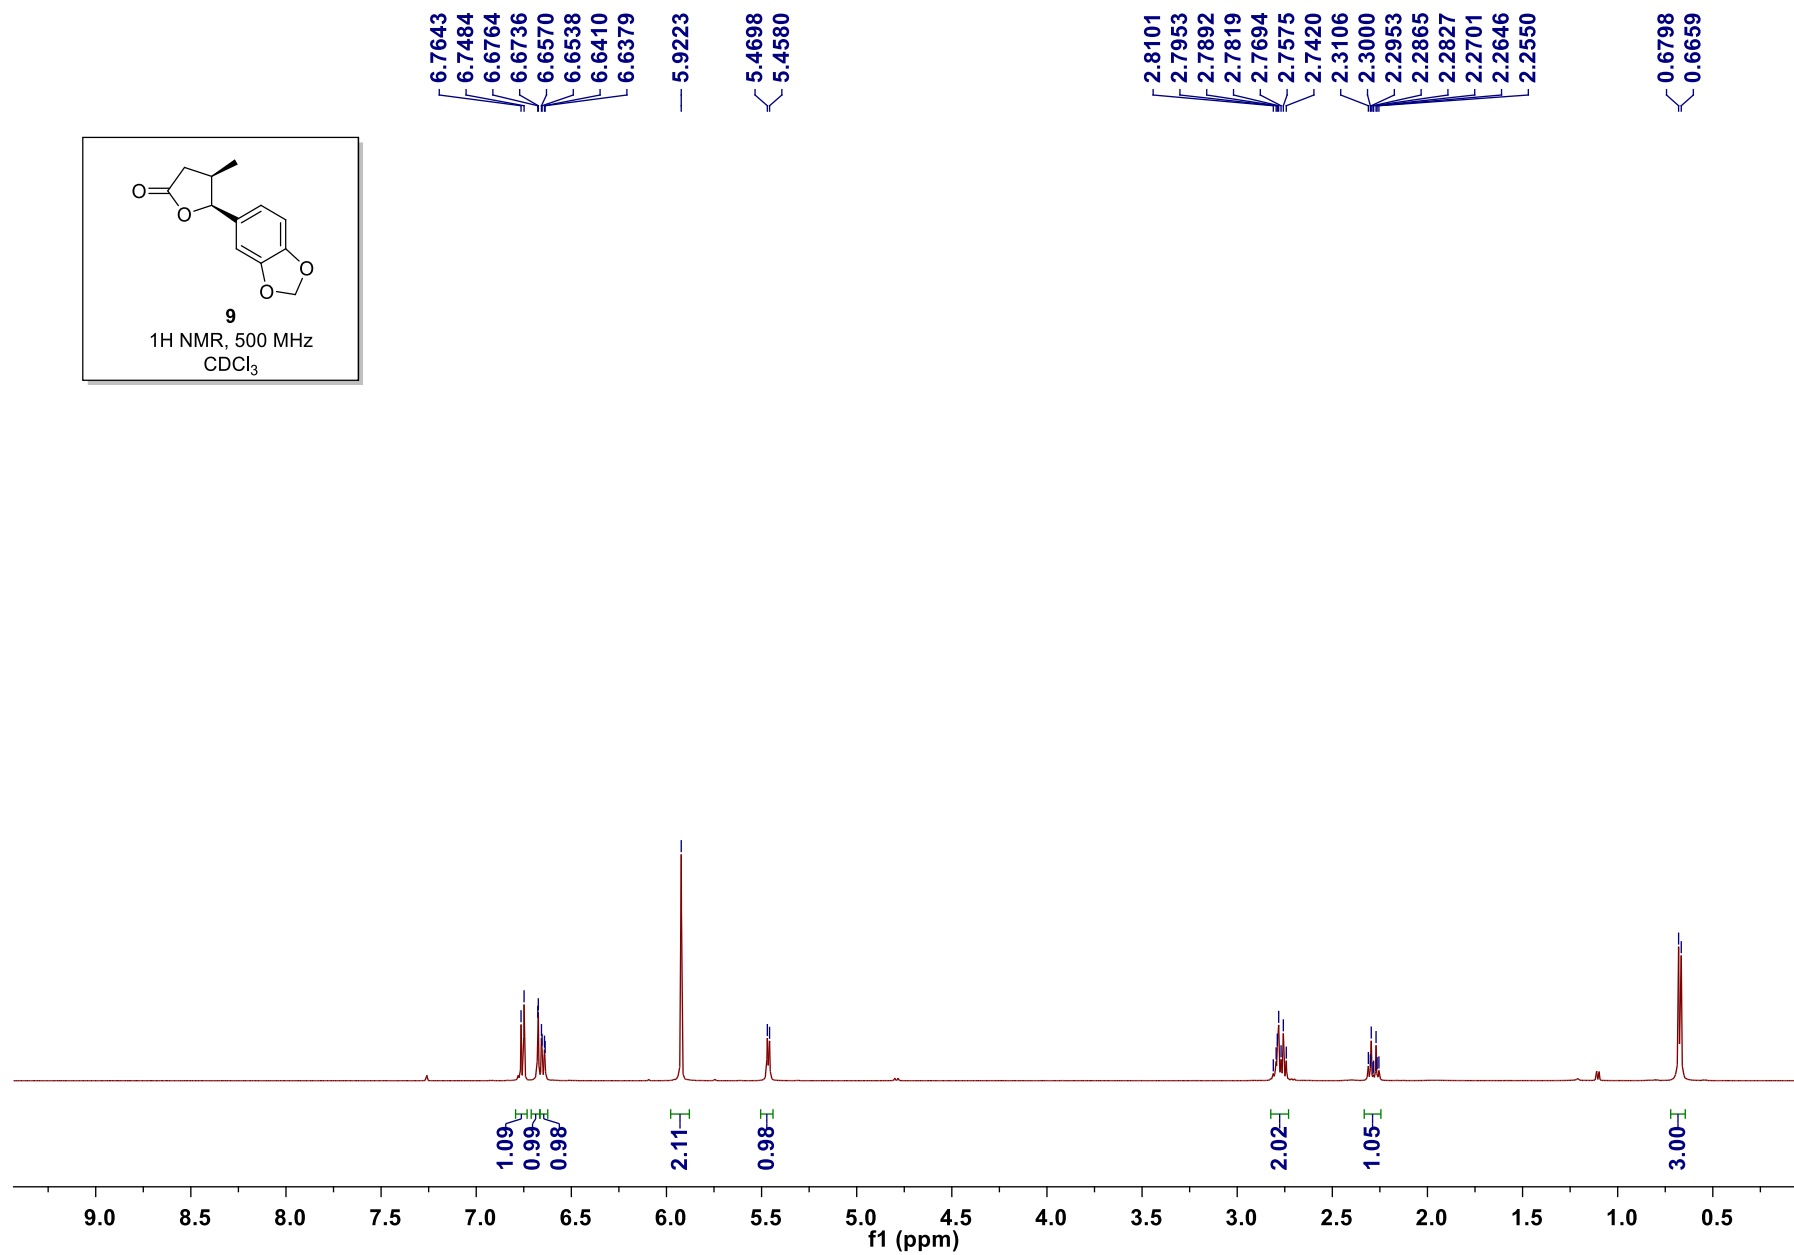



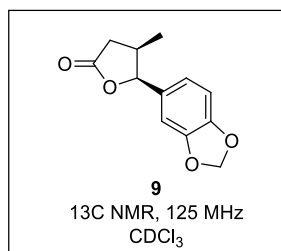

— 176.5

147.7  
147.1

— 129.8

— 118.7

108.0  
105.9  
101.0

83.8  
77.3  
77.0  
76.7

36.8  
34.8

— 14.9

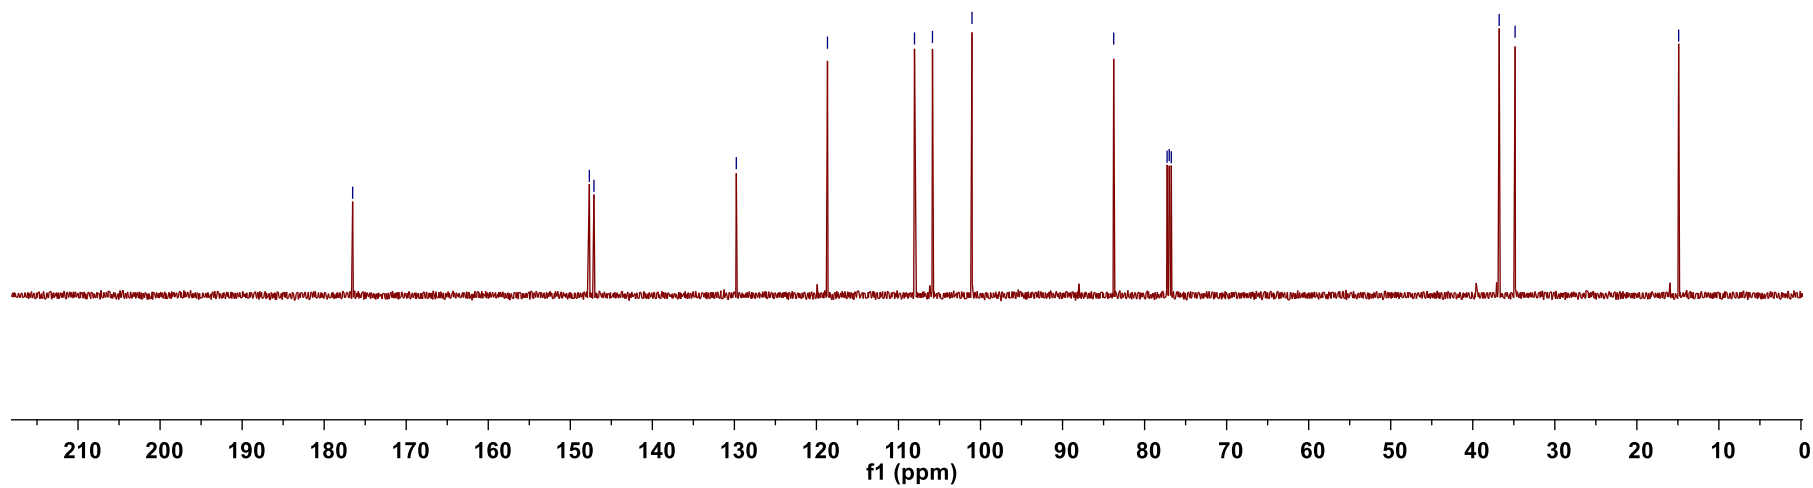

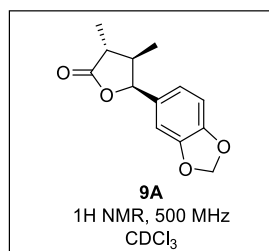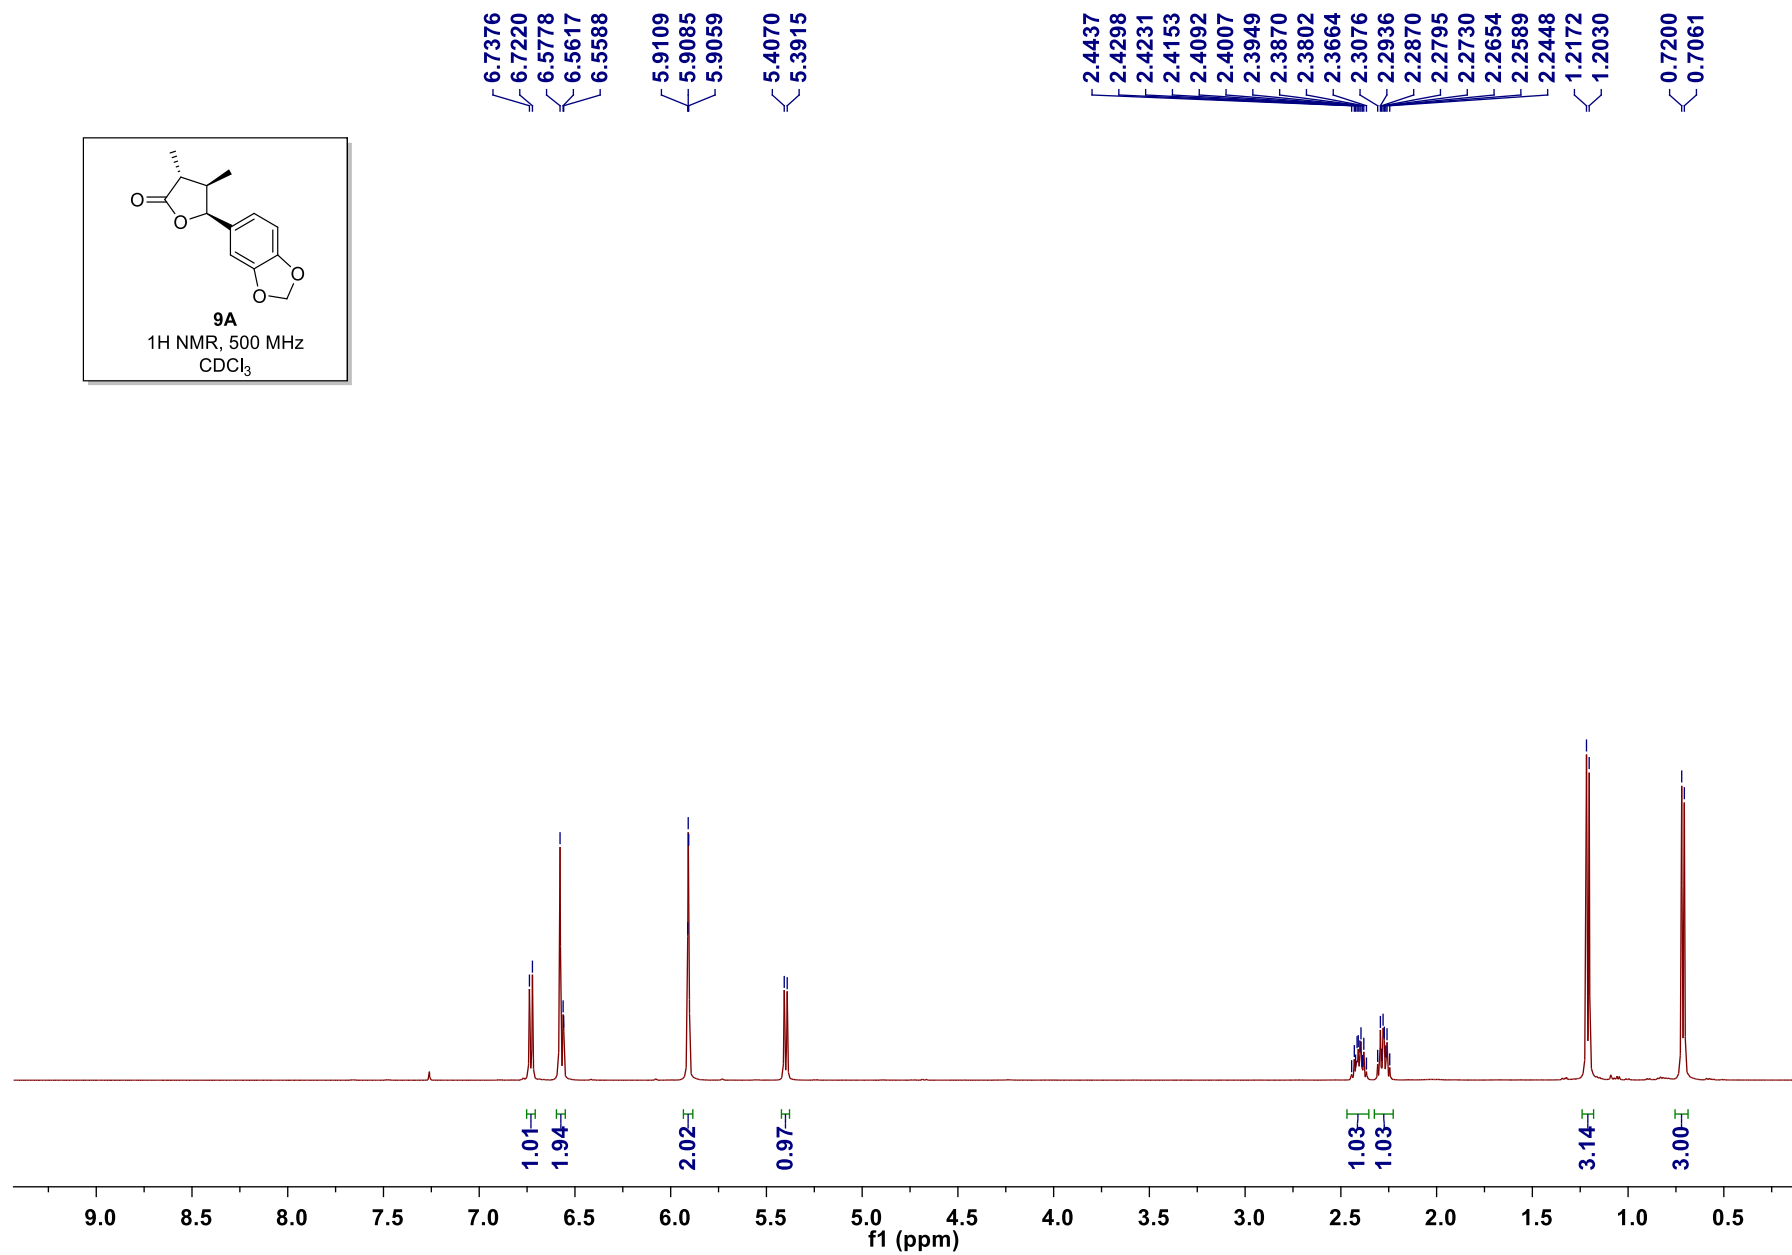

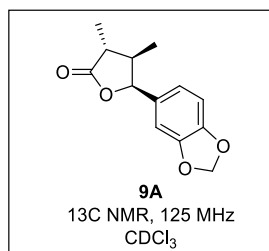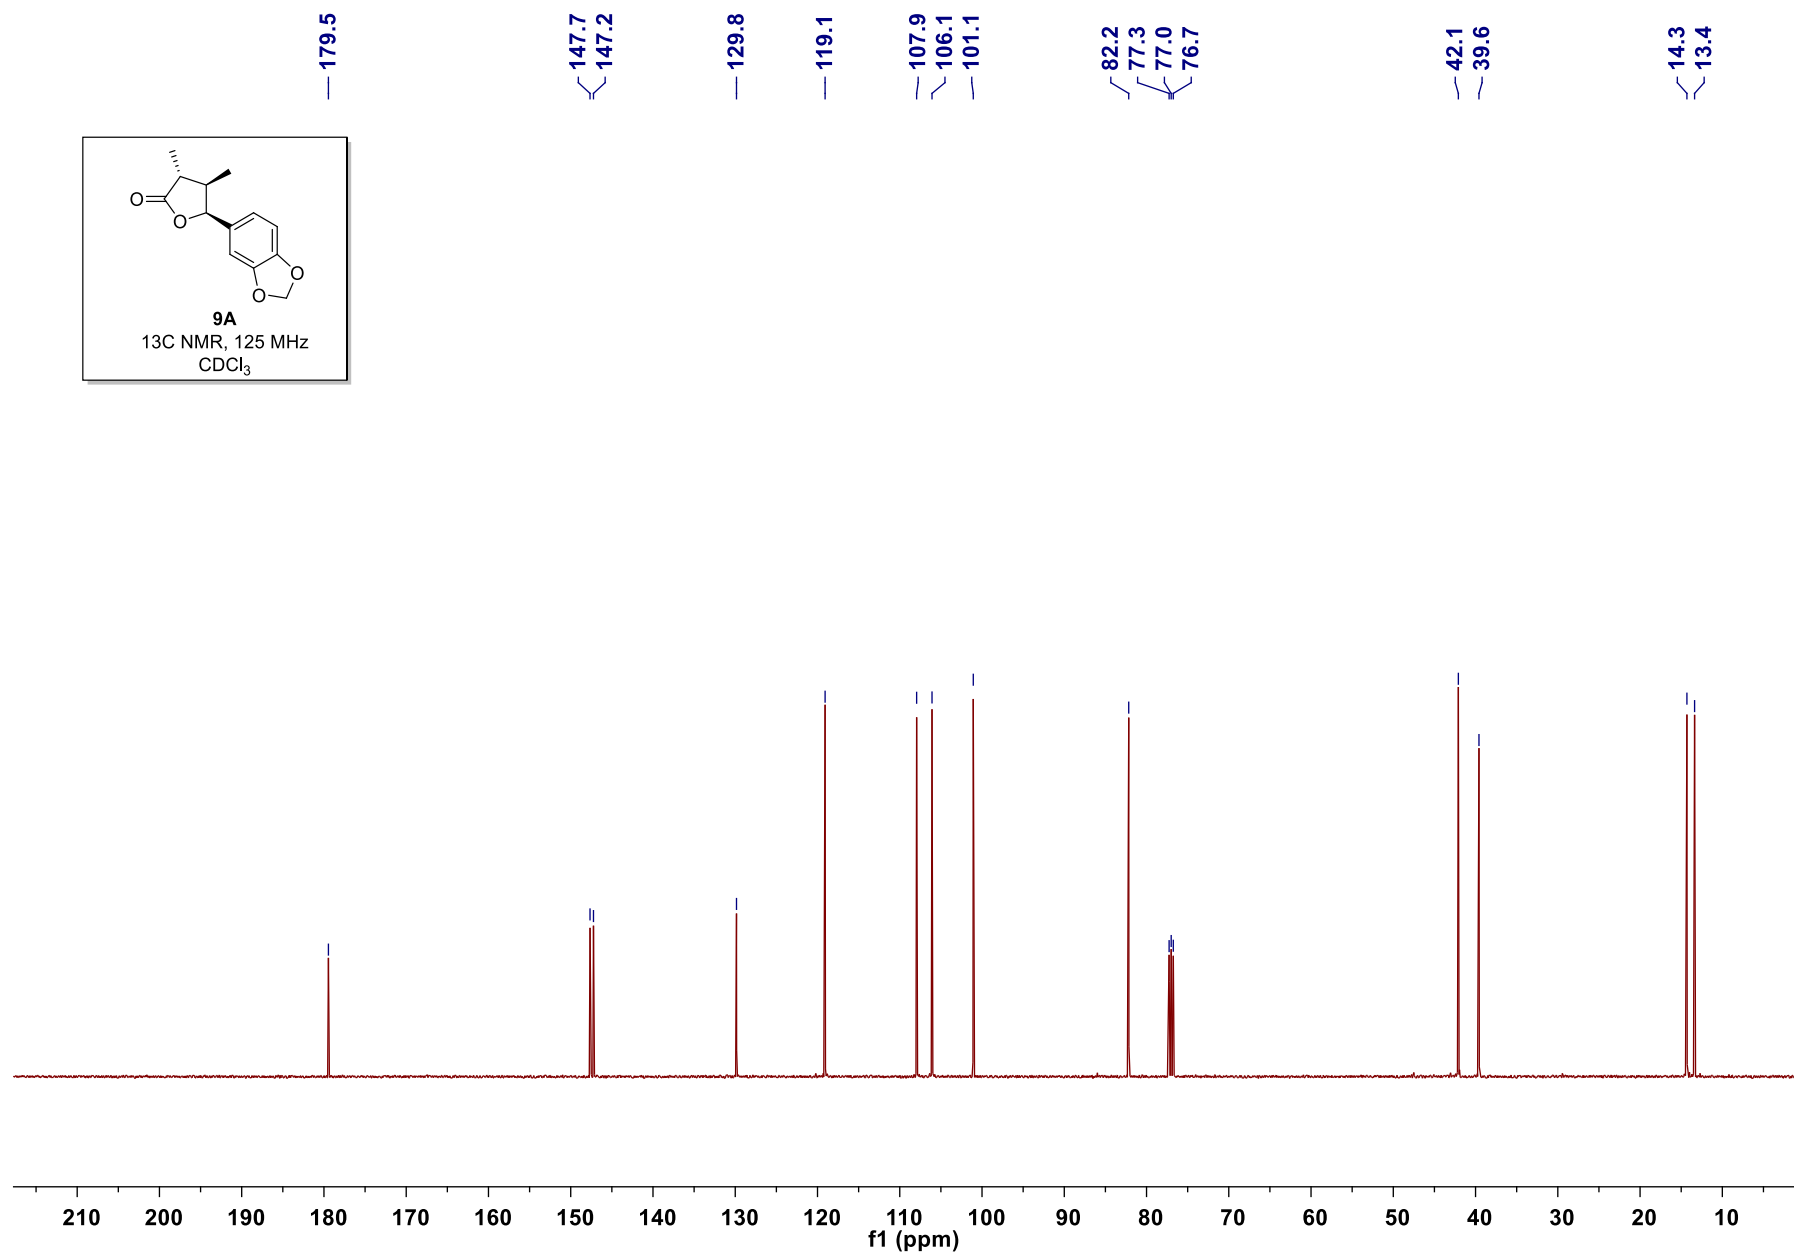

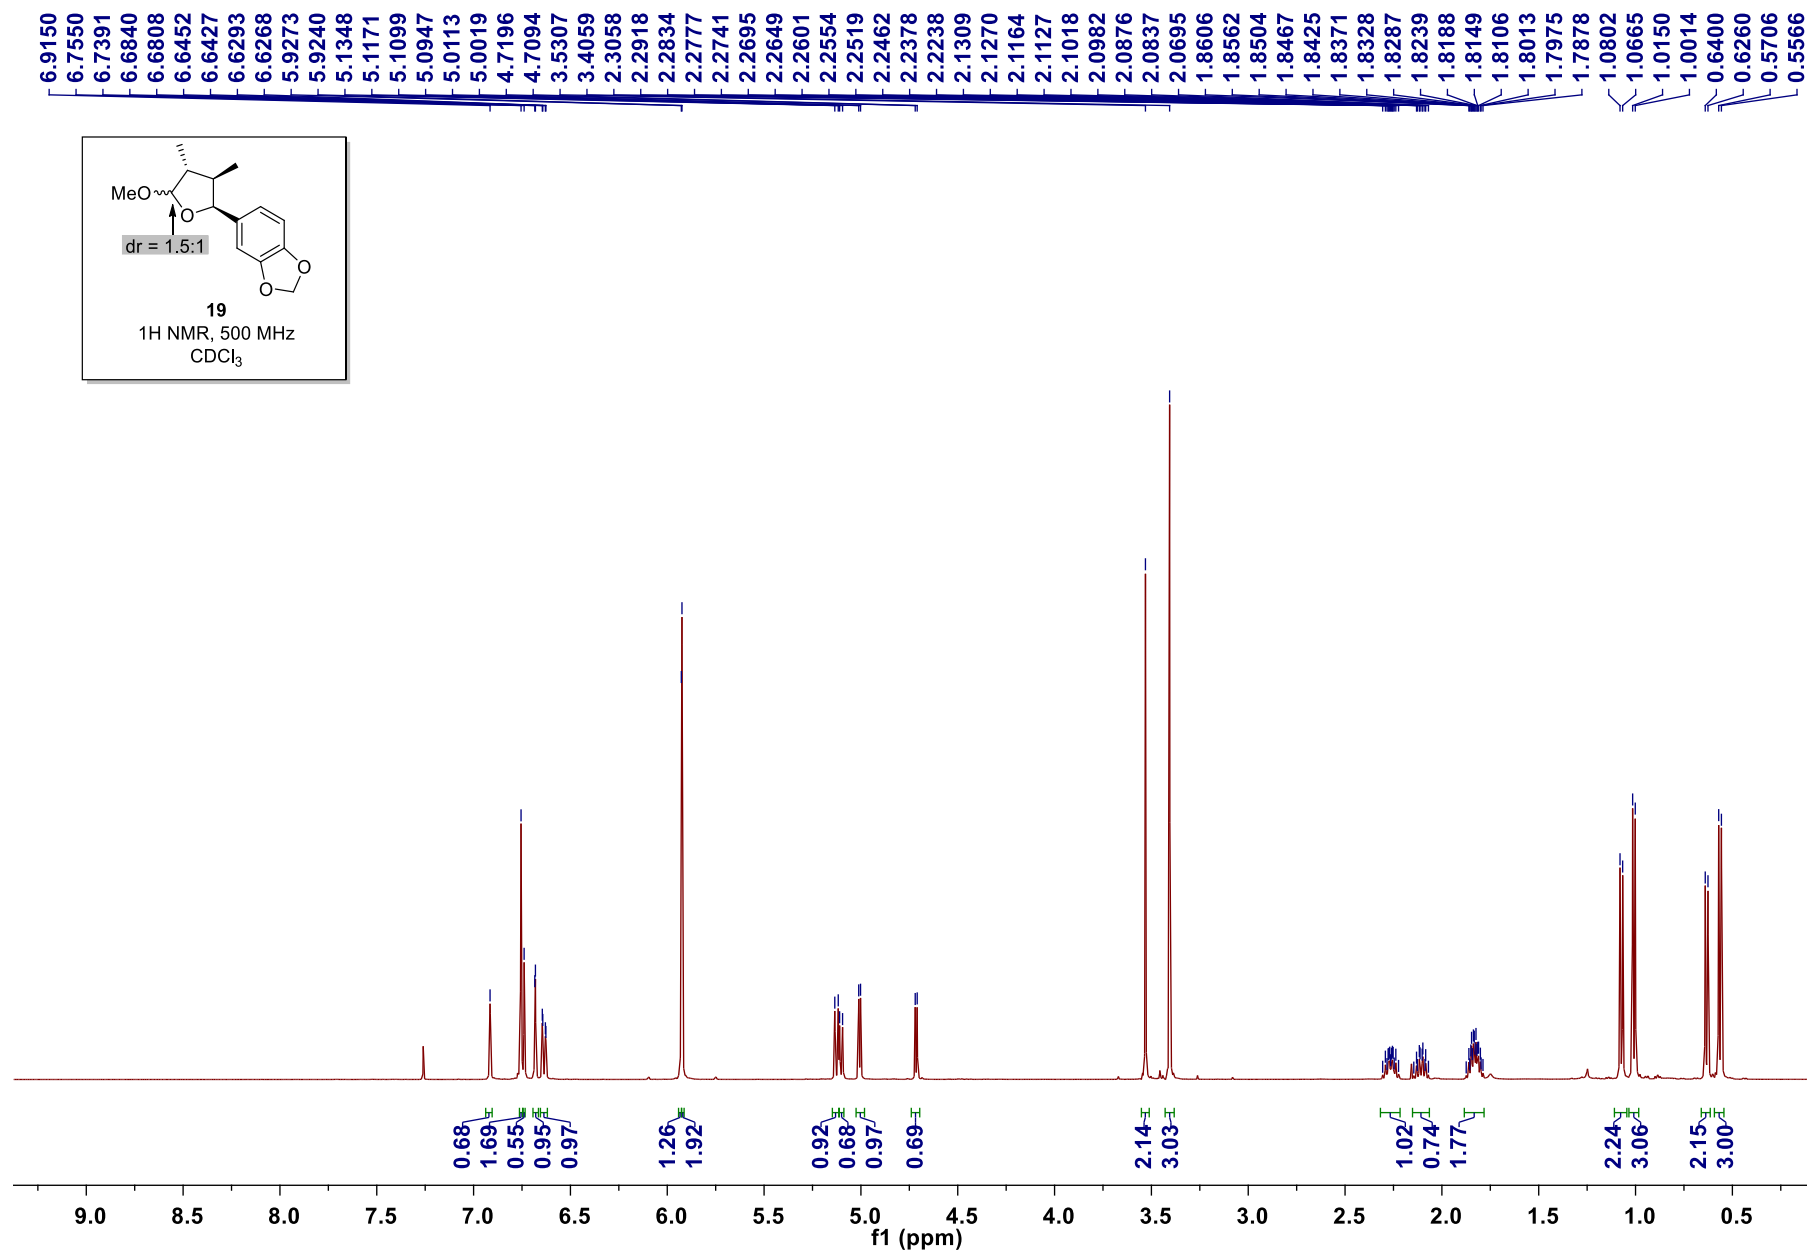

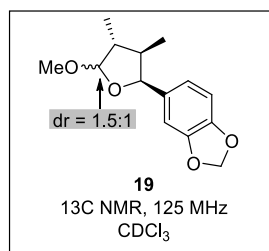

147.4  
 147.3  
 146.5  
 146.4  
 134.7  
 134.7

119.9  
 112.4  
 107.7  
 107.6  
 107.5  
 107.2  
 106.2  
 100.8  
 100.8

84.5  
 83.2  
 77.3  
 77.0  
 76.7

56.6  
 54.8  
 44.7  
 44.1  
 43.9  
 41.3

14.9  
 14.4  
 14.3  
 11.5

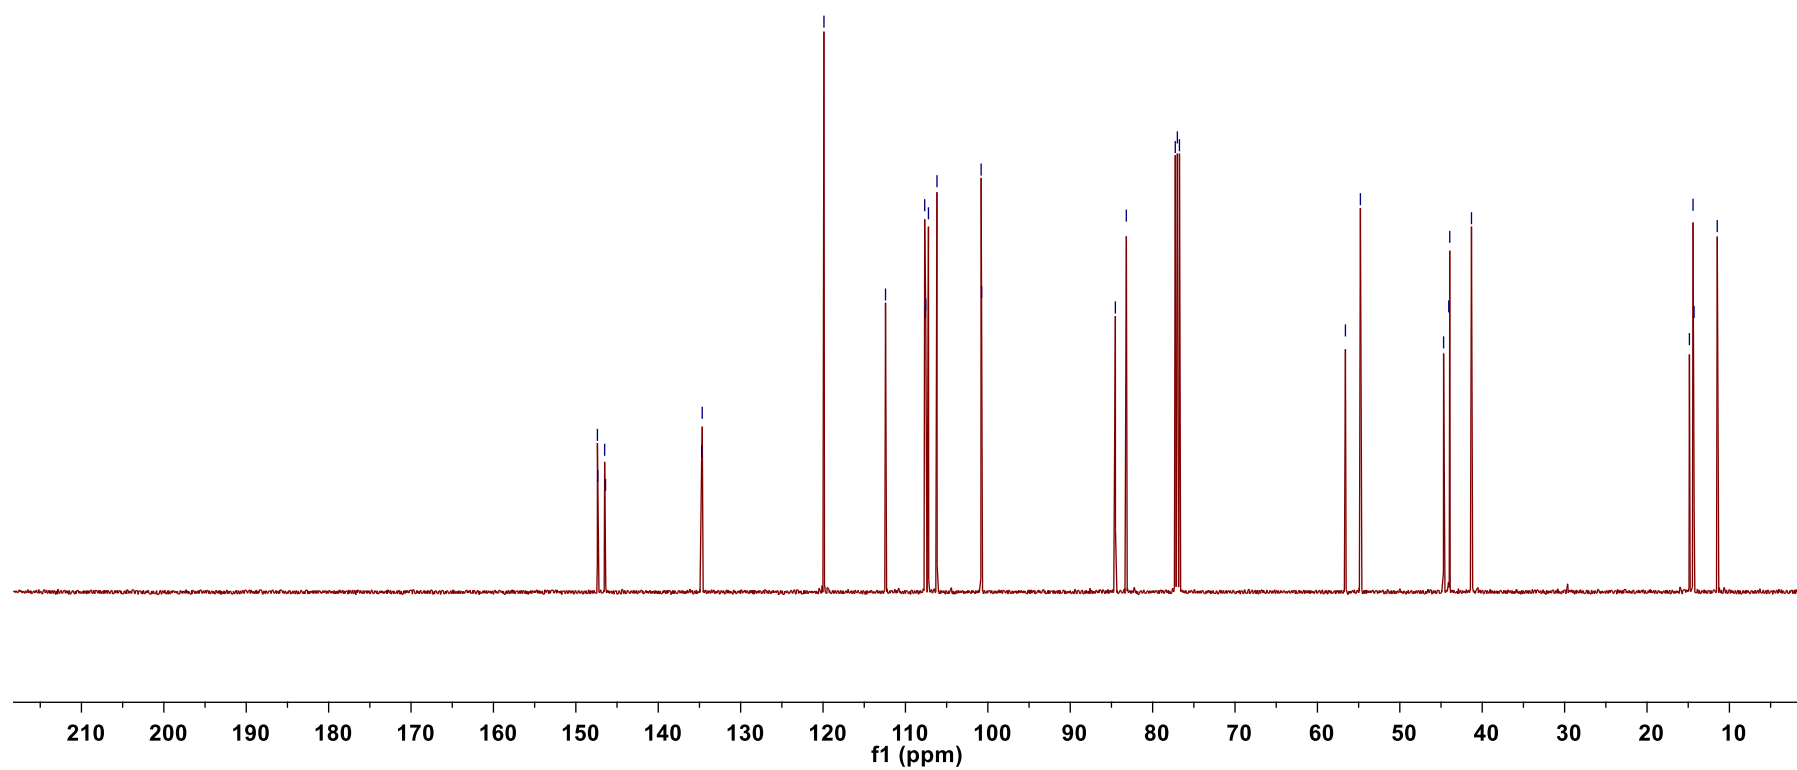

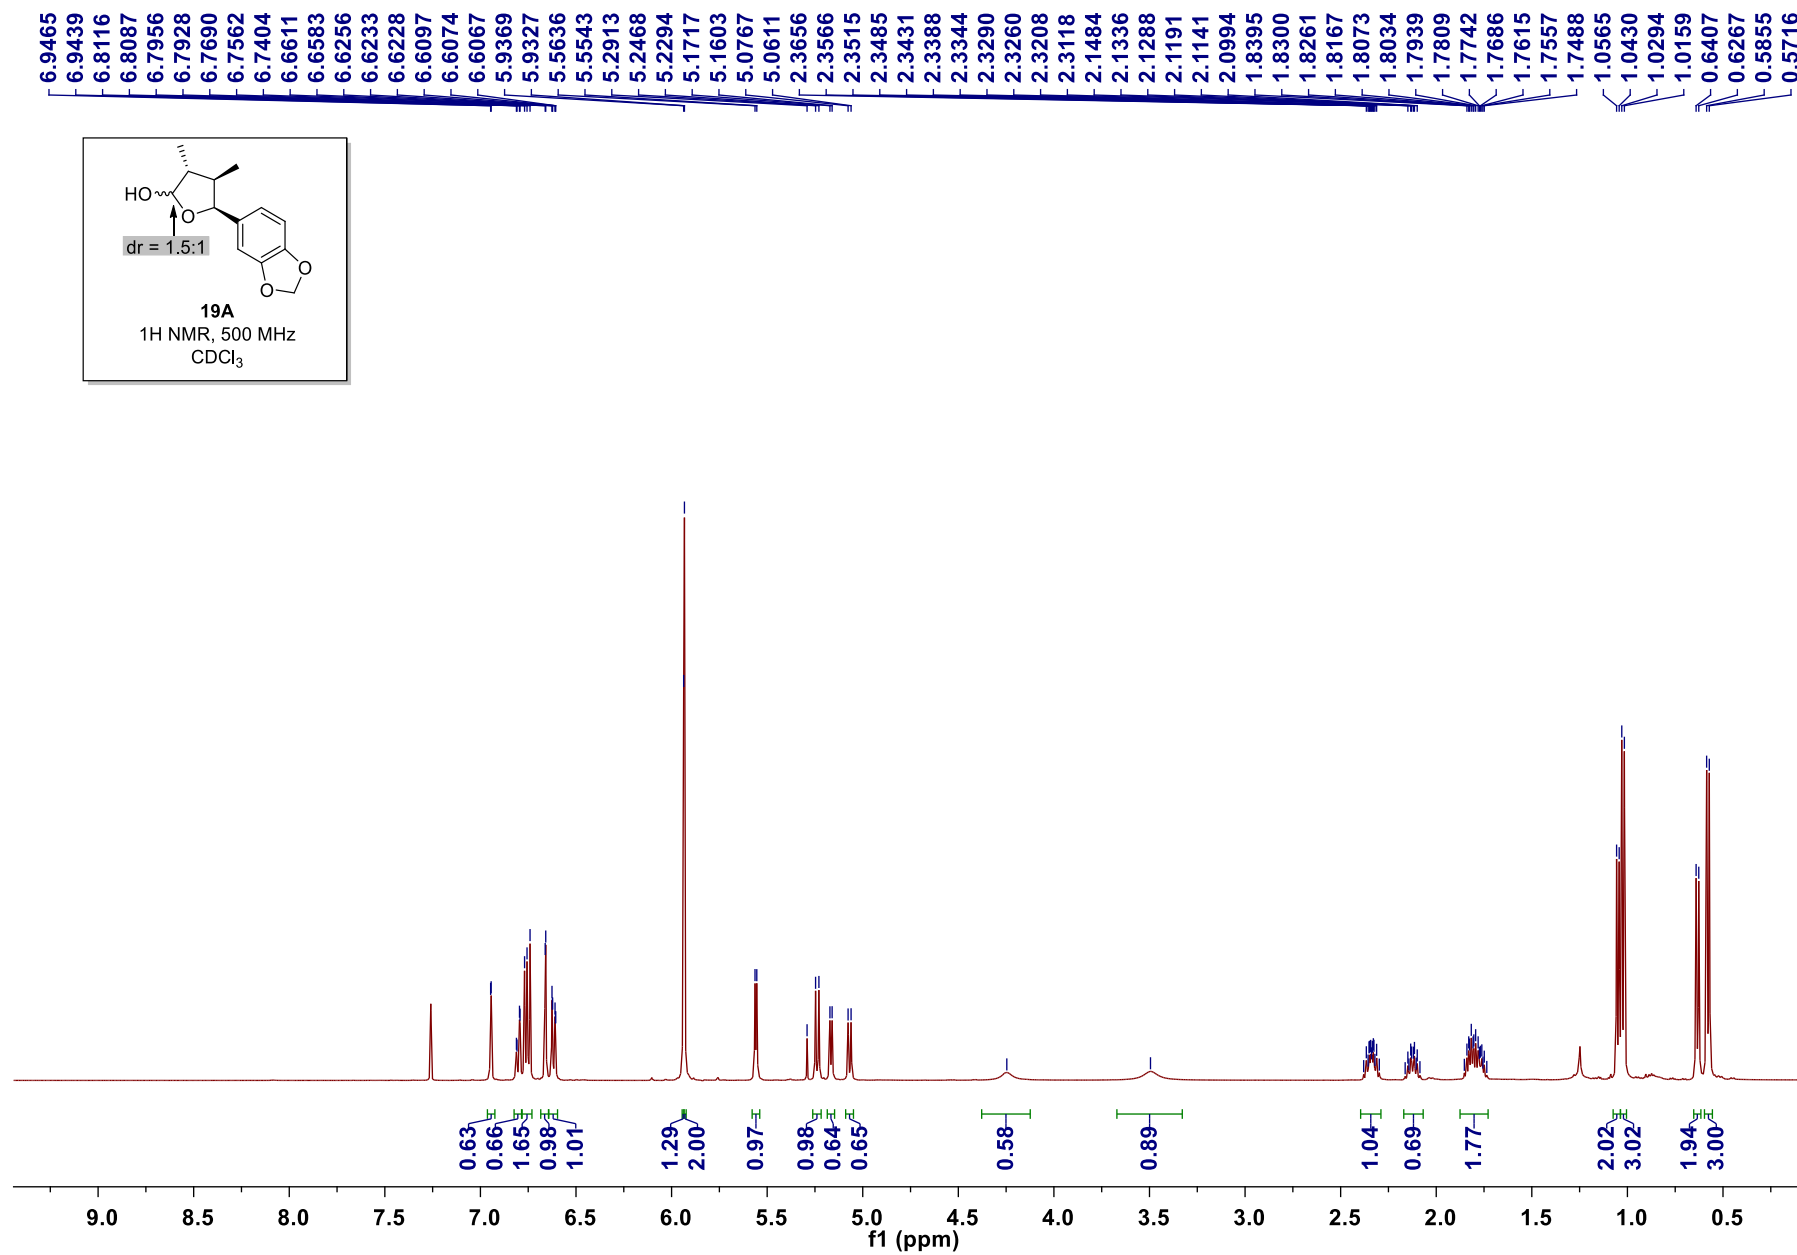

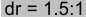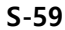

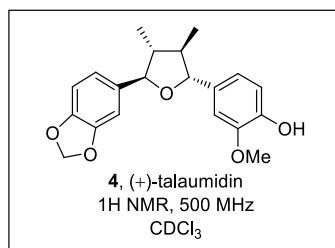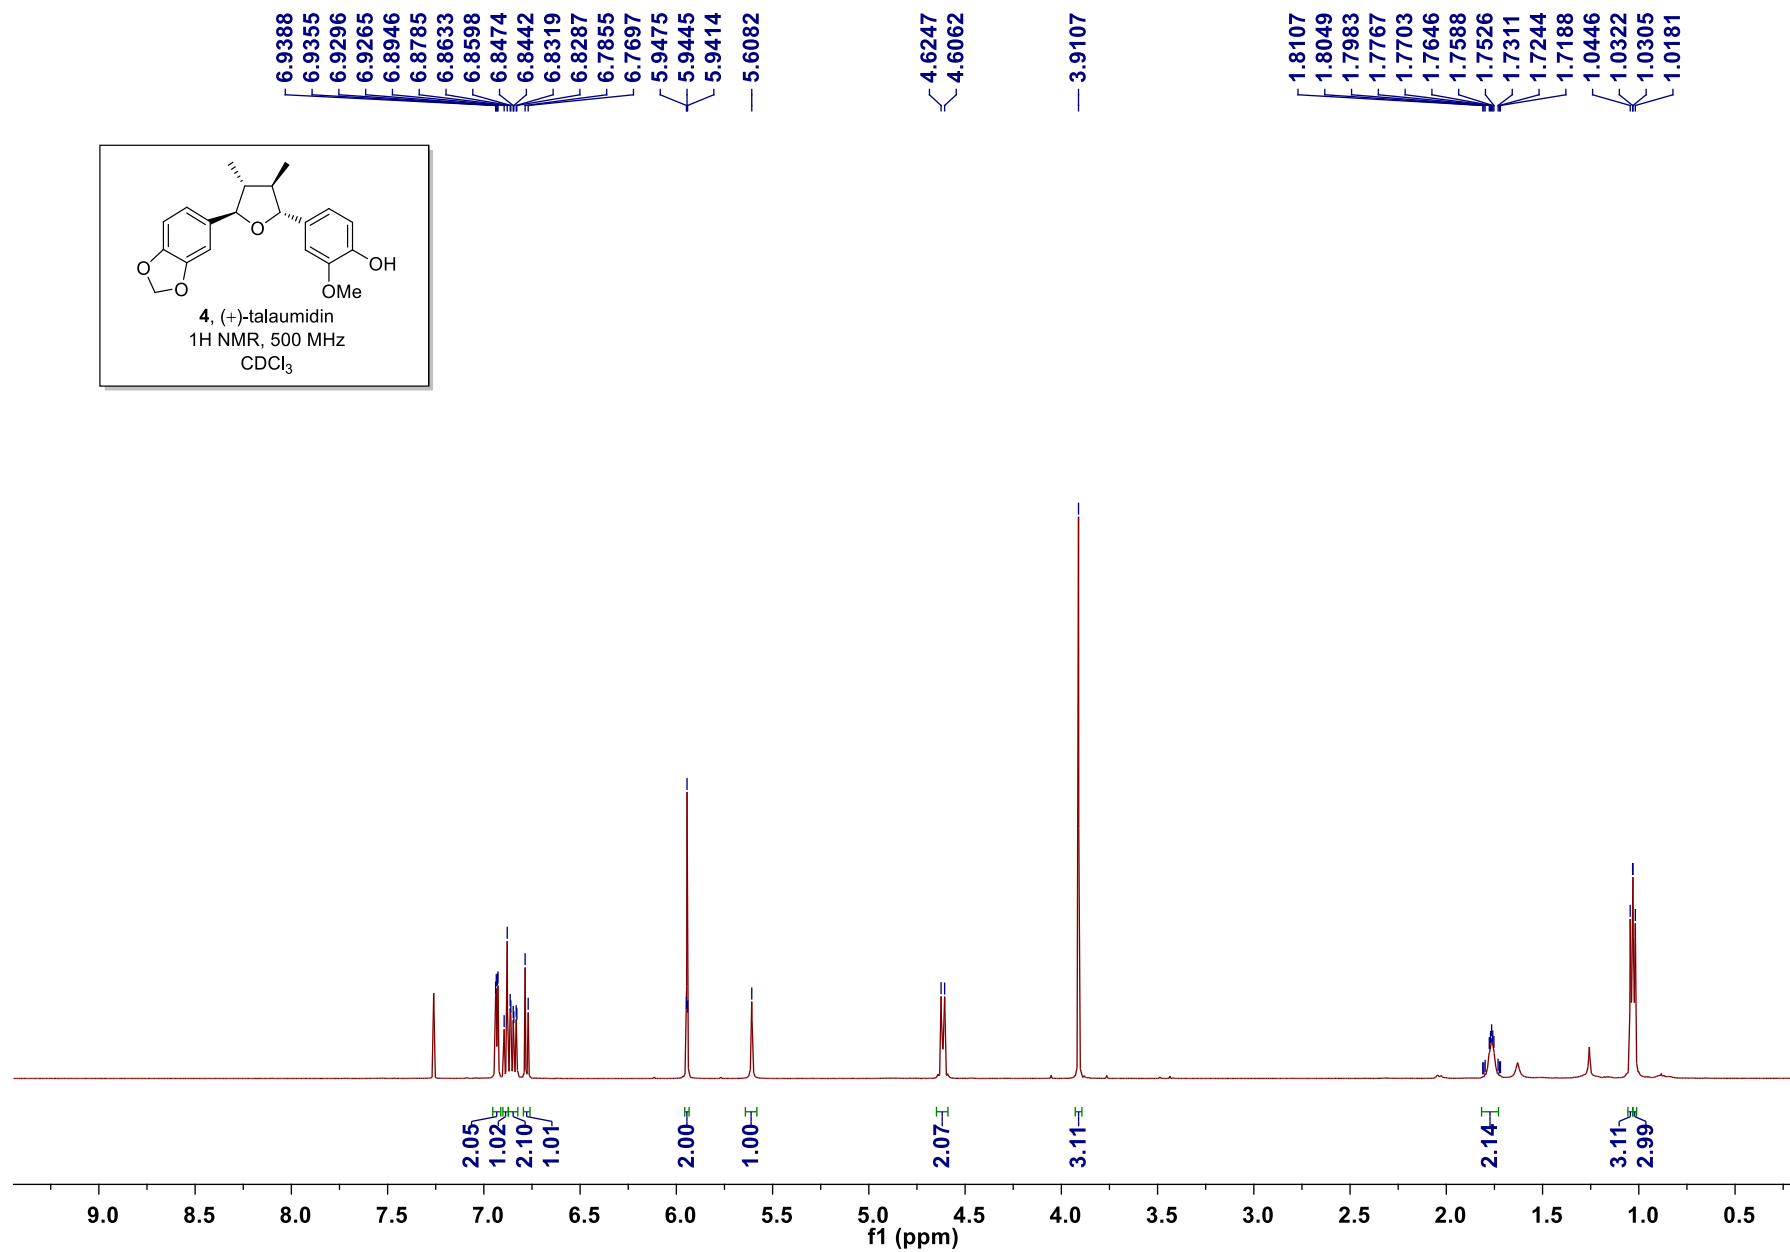



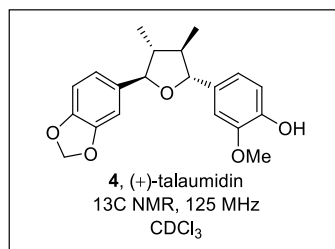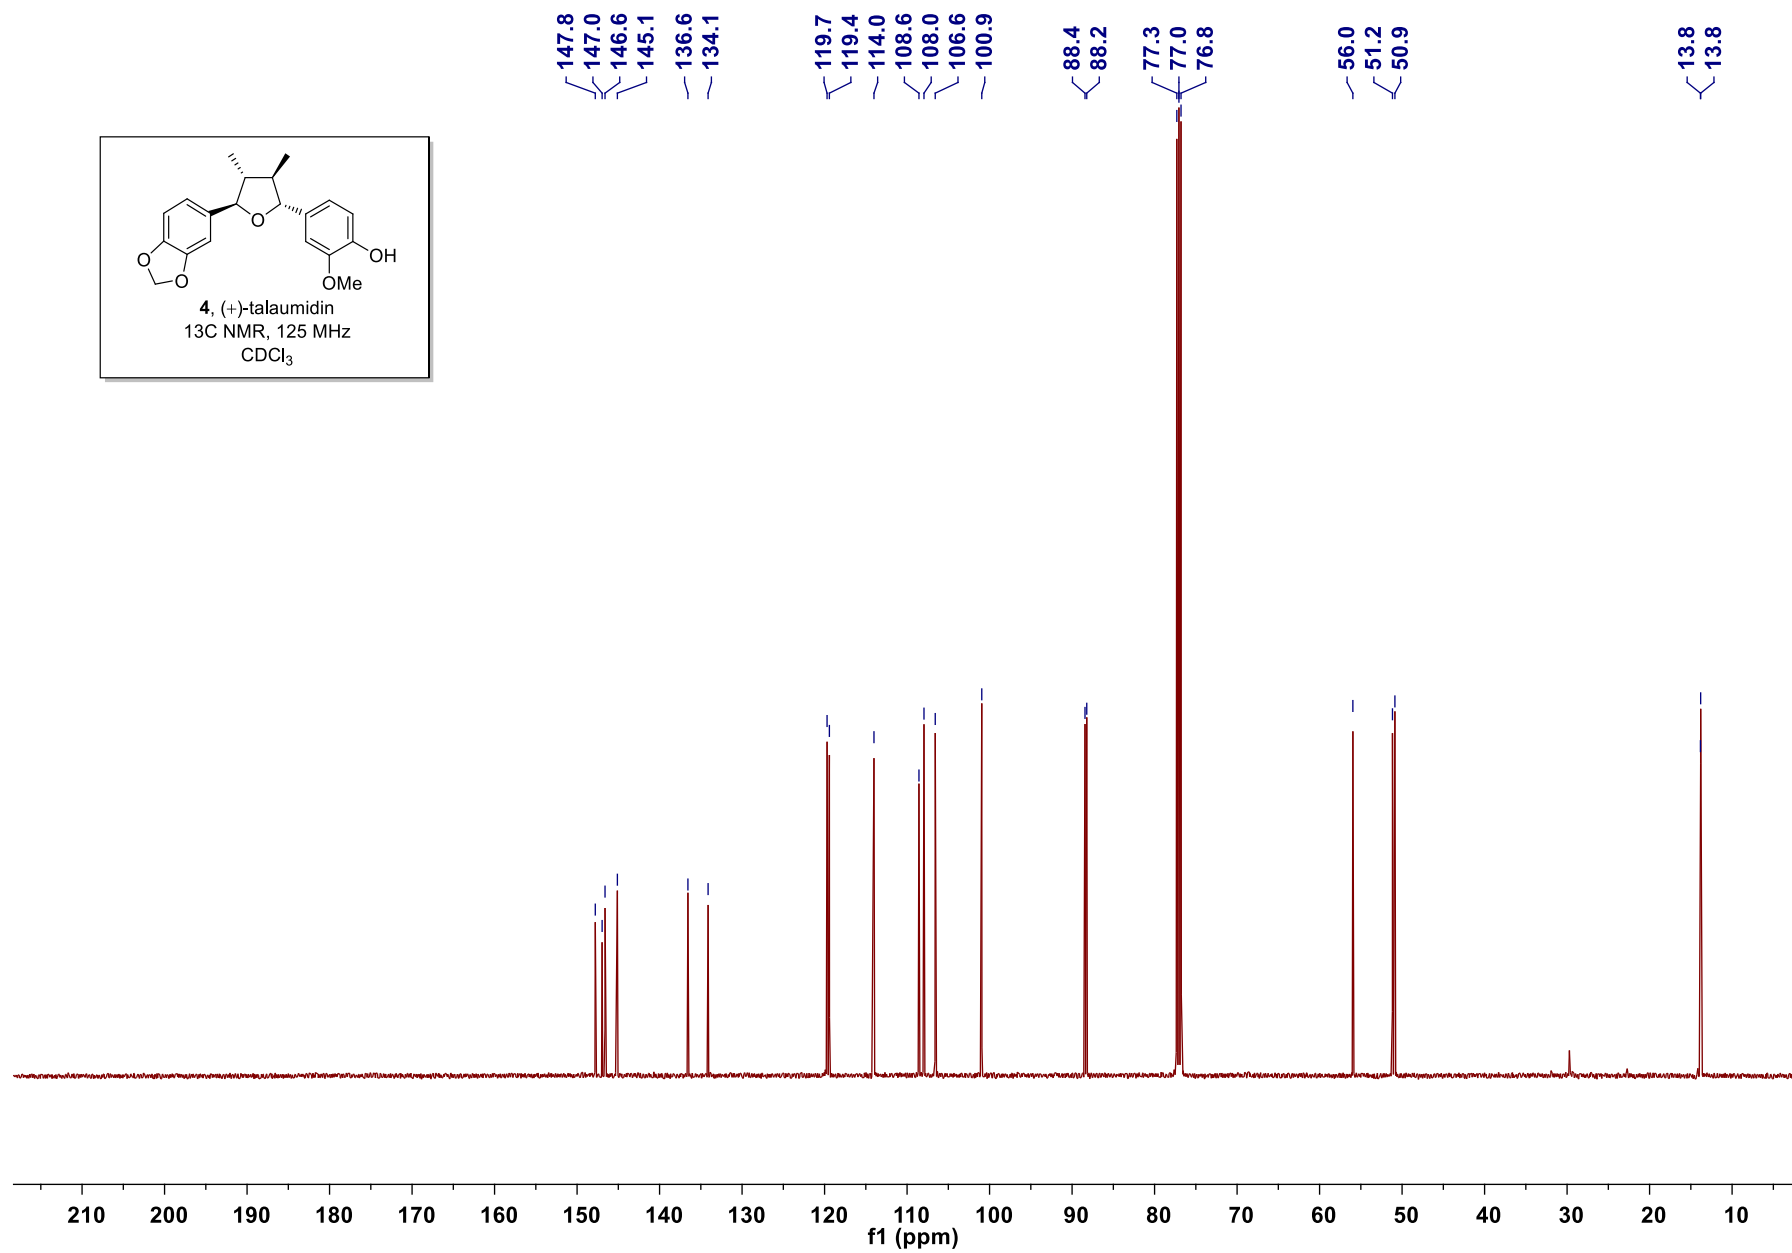

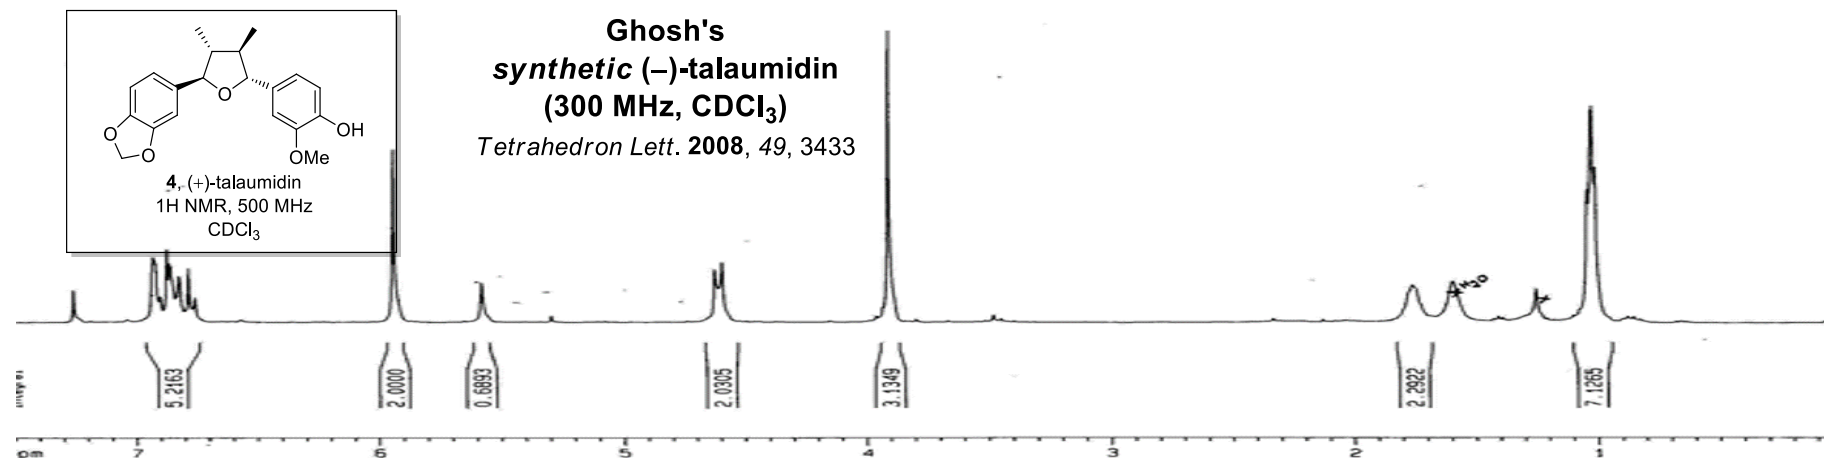

6.9388 6.9355 6.9296 6.9265 6.8785 6.8633 6.8598 6.8474 6.8319 6.8287 6.7855 6.7697 5.9475 5.9445 5.9414 5.6082 4.6247 4.6062 3.9107 1.8107 1.8049 1.7983 1.7767 1.7703 1.7646 1.7588 1.7526 1.7311 1.7244 1.7188 1.0446 1.0322 1.0305 1.0181

**Synthetic (+)-talaumidin  
(500 MHz, CDCl<sub>3</sub>)**

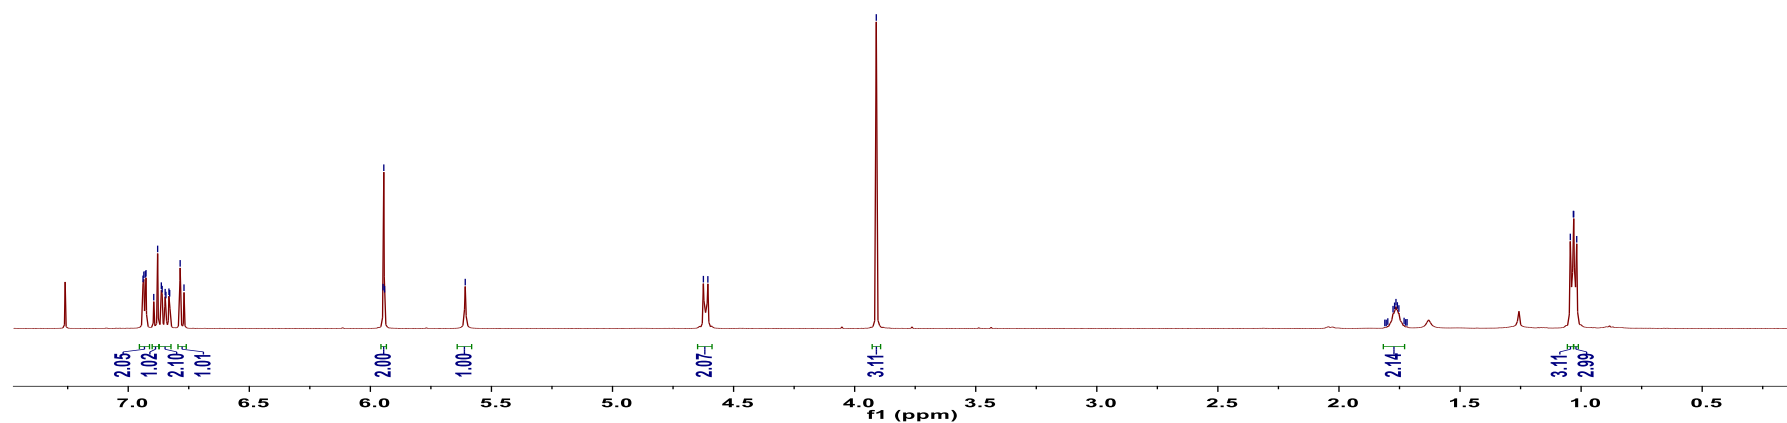

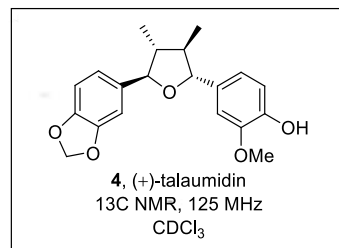

**Ghosh's**  
**synthetic (-)-talaumidin**  
**(75 MHz, CDCl<sub>3</sub>)**  
*Tetrahedron Lett.* **2008**, *49*, 3433

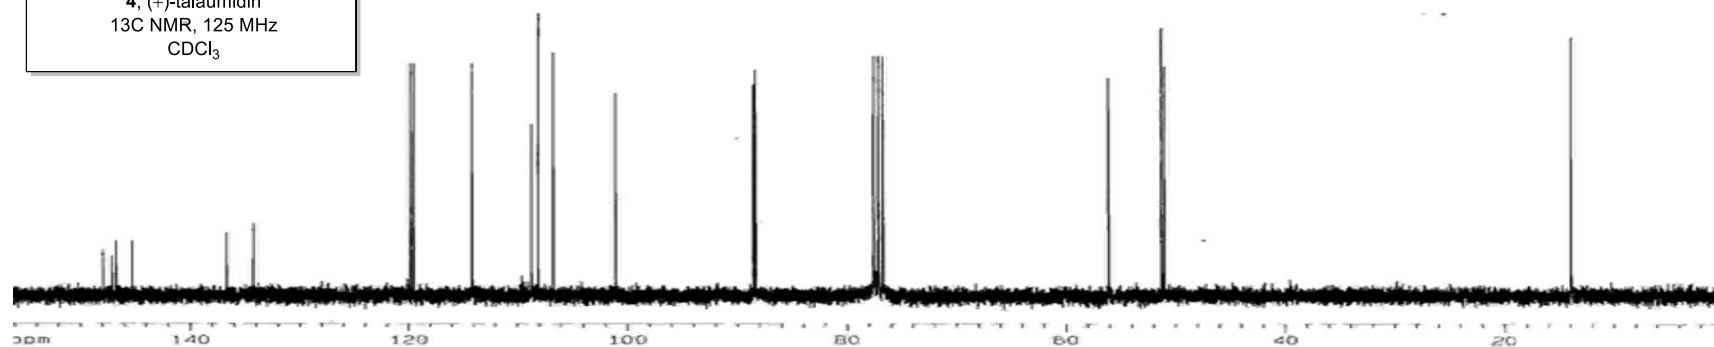

147.8 147.0 146.6 145.1 136.6 134.1 119.7 119.4 114.0 108.6 108.0 106.6 100.9 88.4 88.2 77.3 77.0 76.8 56.0 51.2 50.9 13.8 13.8

**Synthetic (+)-talaumidin**  
**(125 MHz, CDCl<sub>3</sub>)**

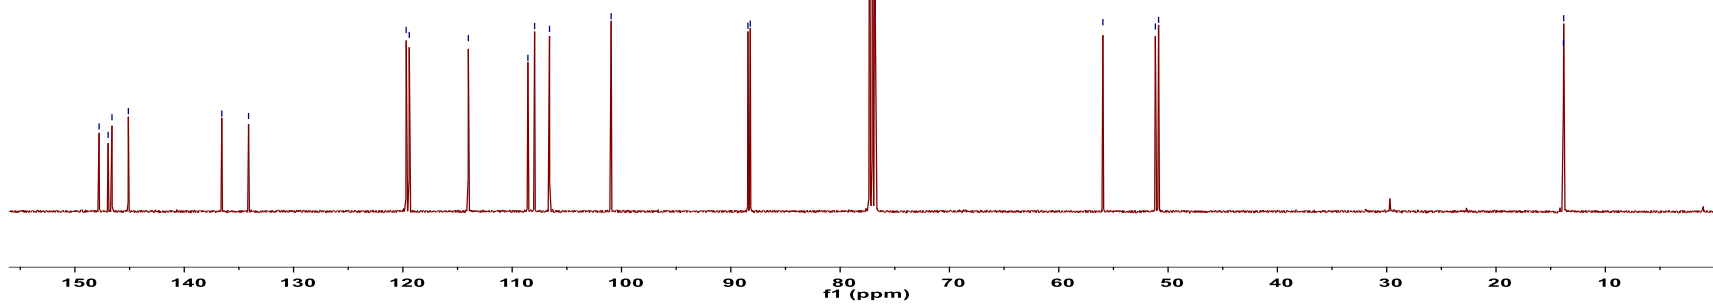

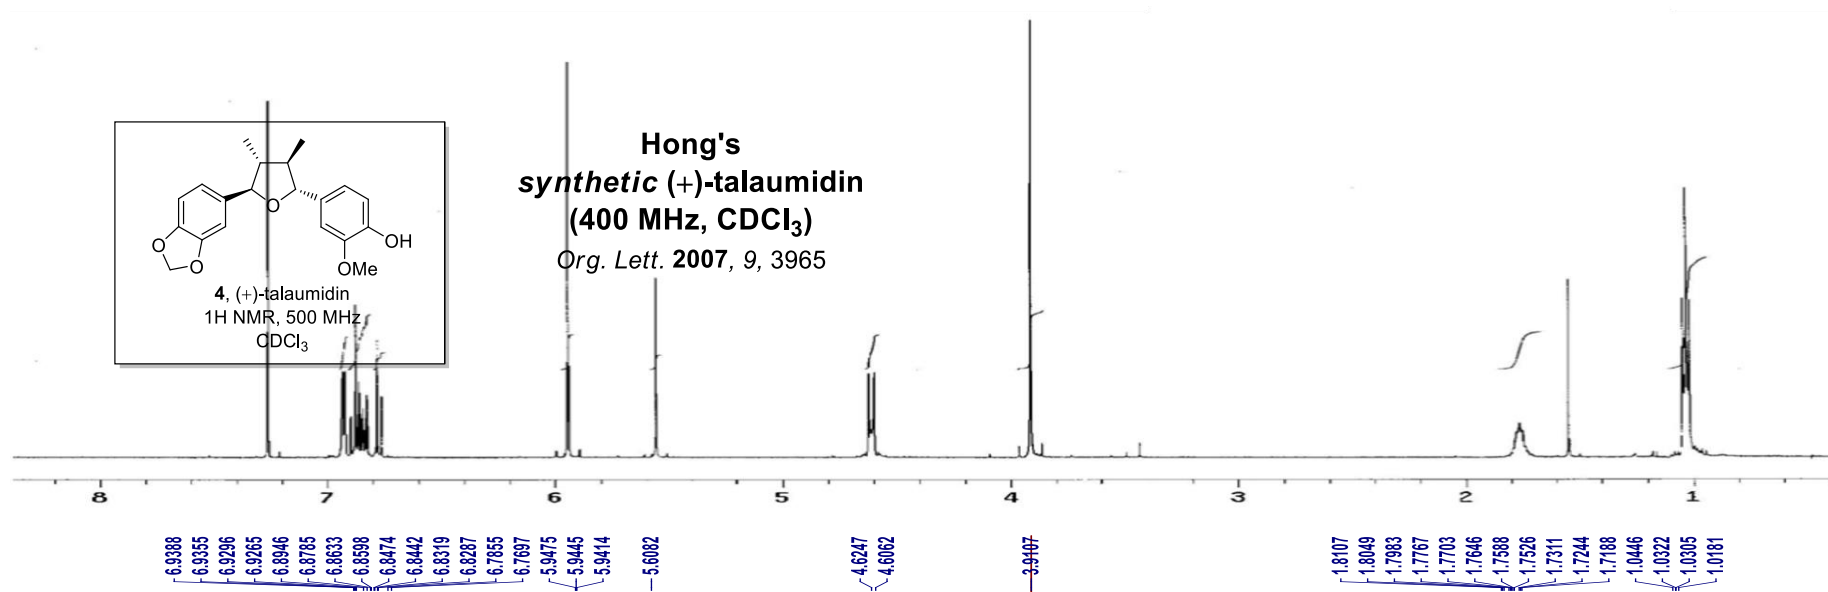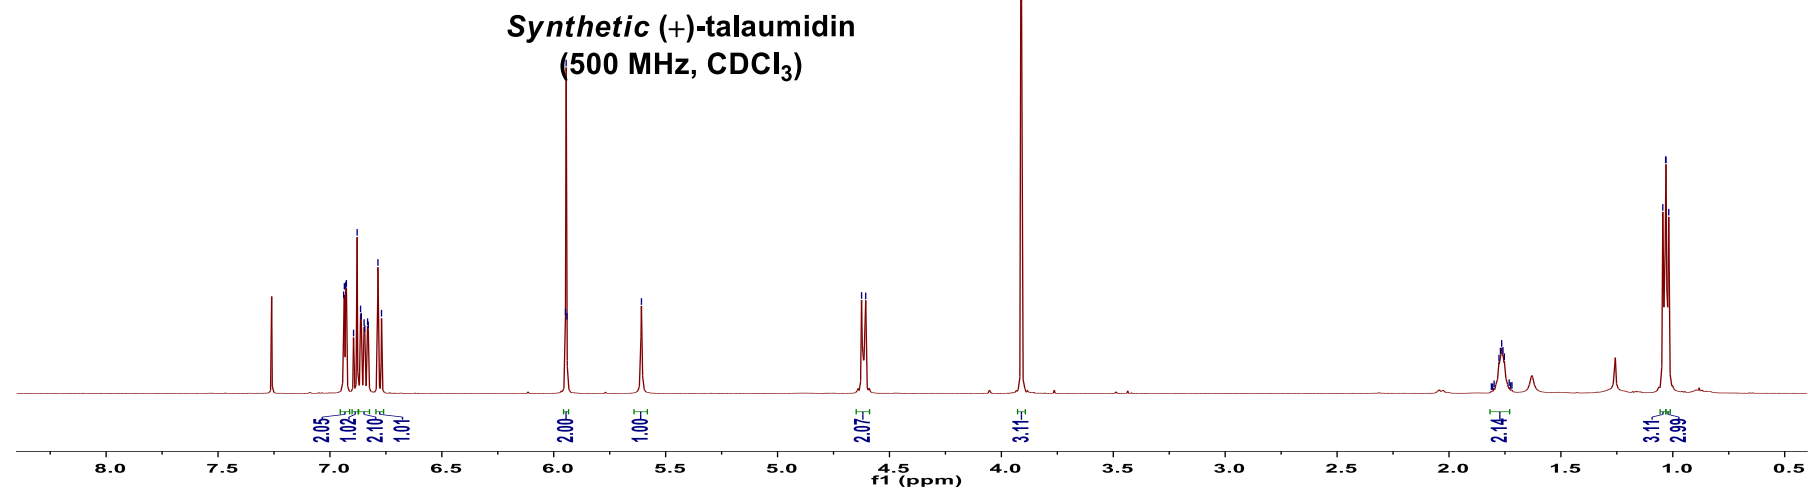

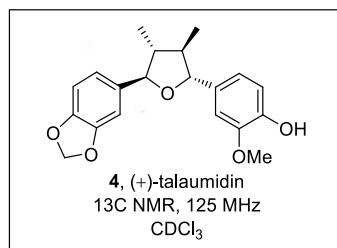

Hong's  
**synthetic (+)-talaumidin**  
 (100 MHz, CDCl<sub>3</sub>)  
*Org. Lett.* 2007, 9, 3965

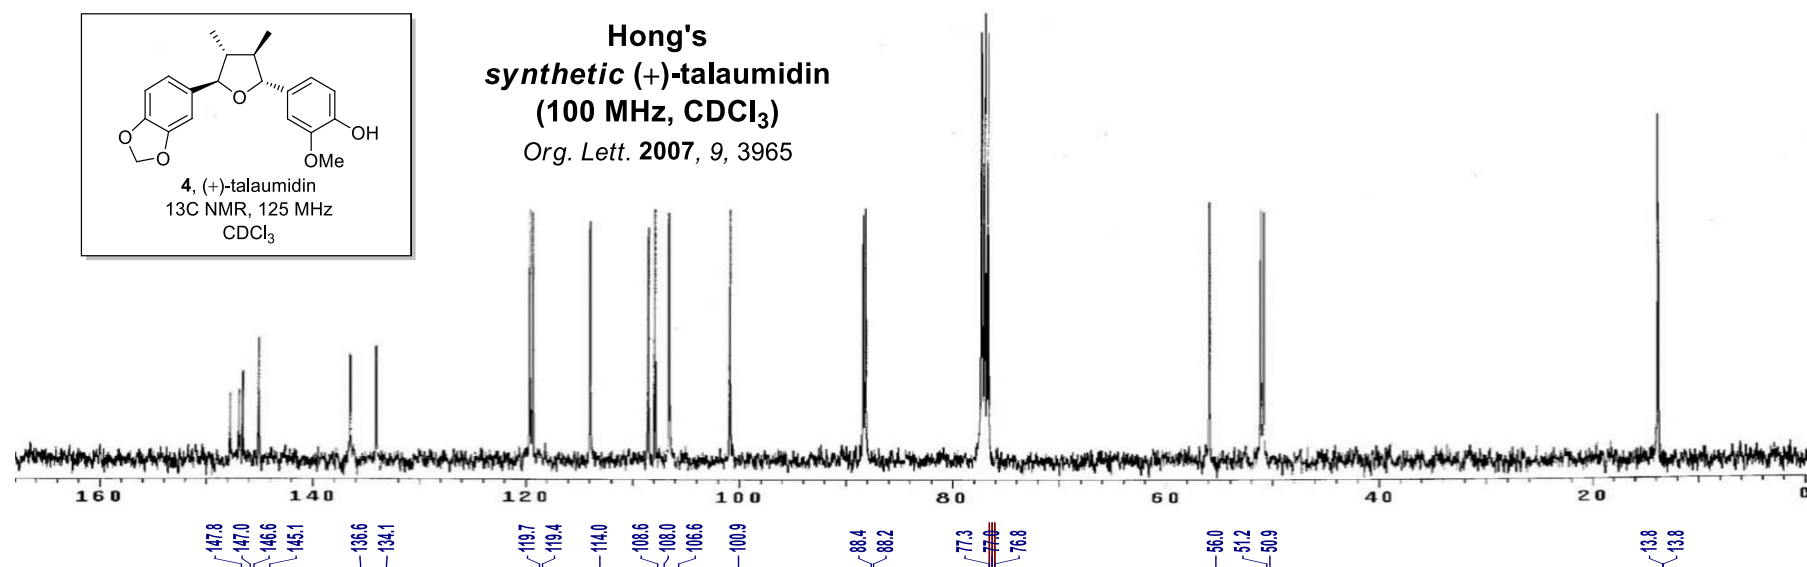

**Synthetic (+)-talaumidin**  
 (125 MHz, CDCl<sub>3</sub>)

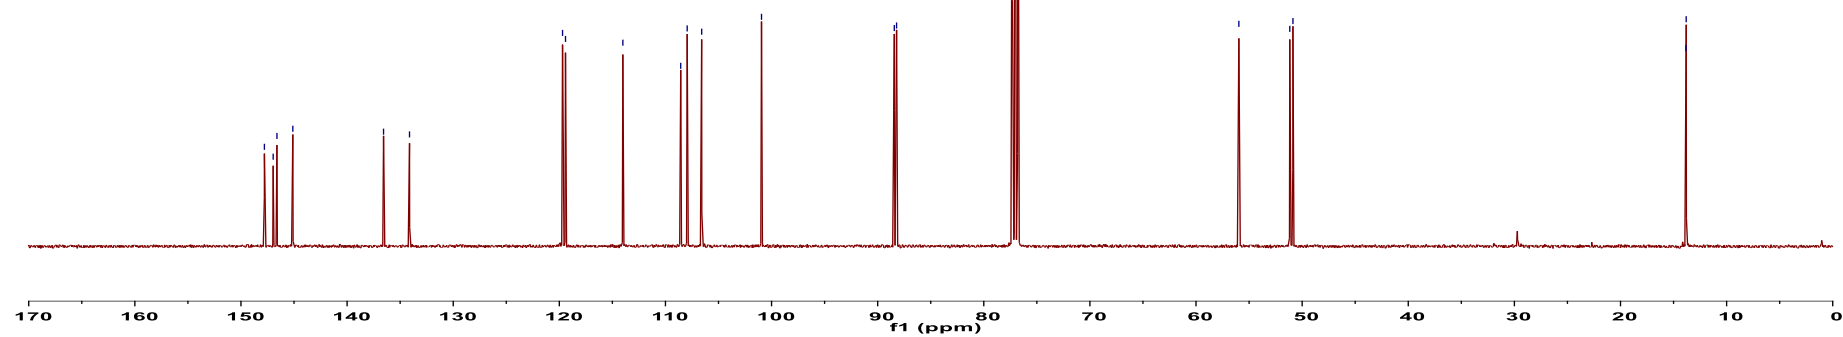

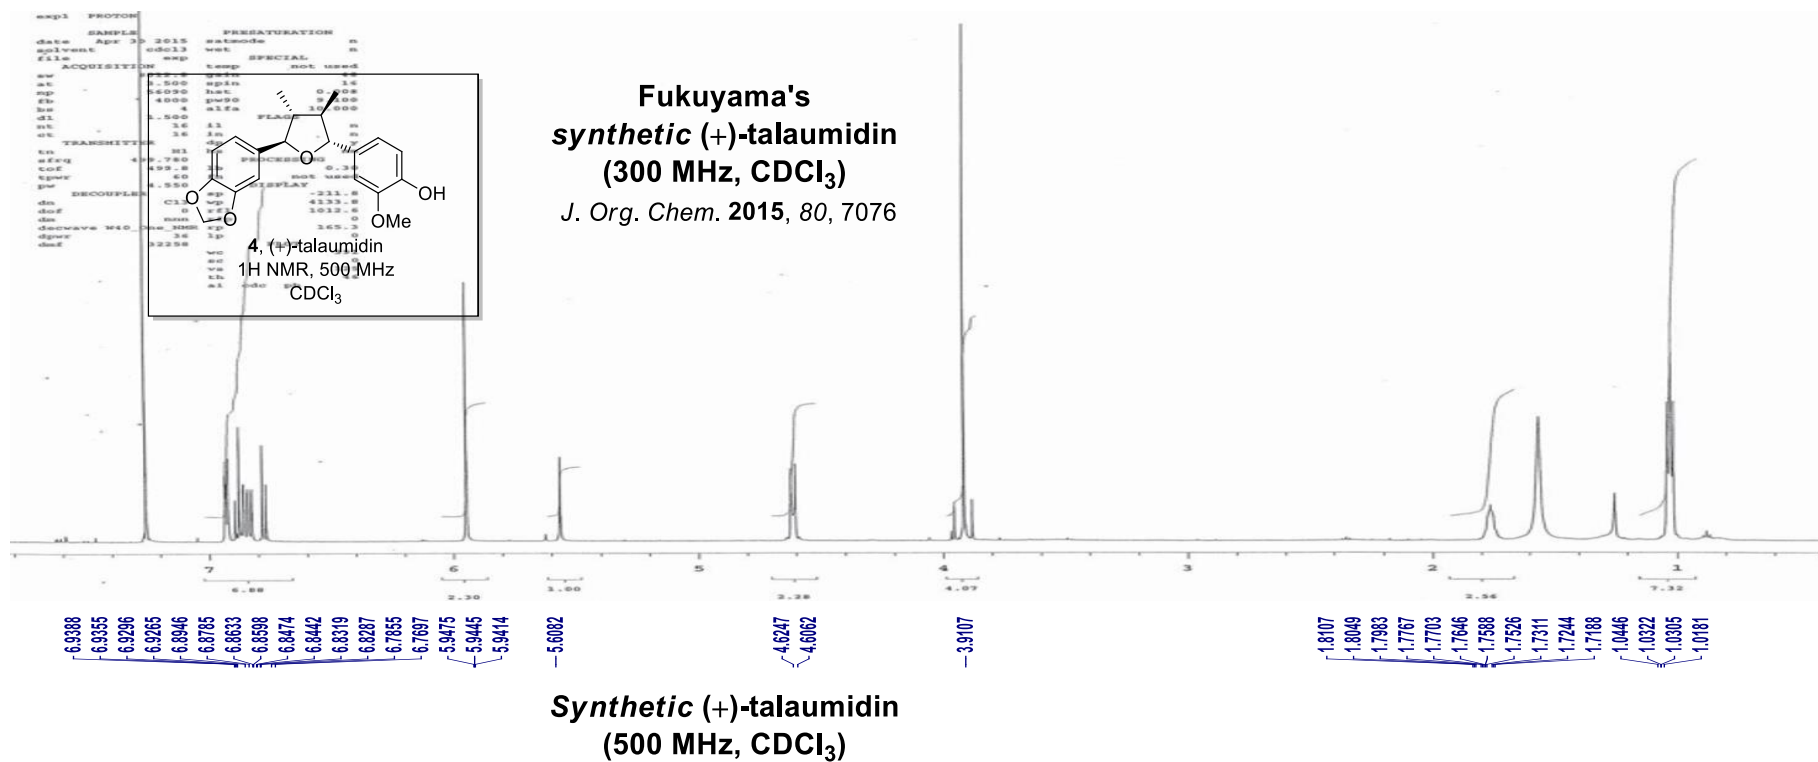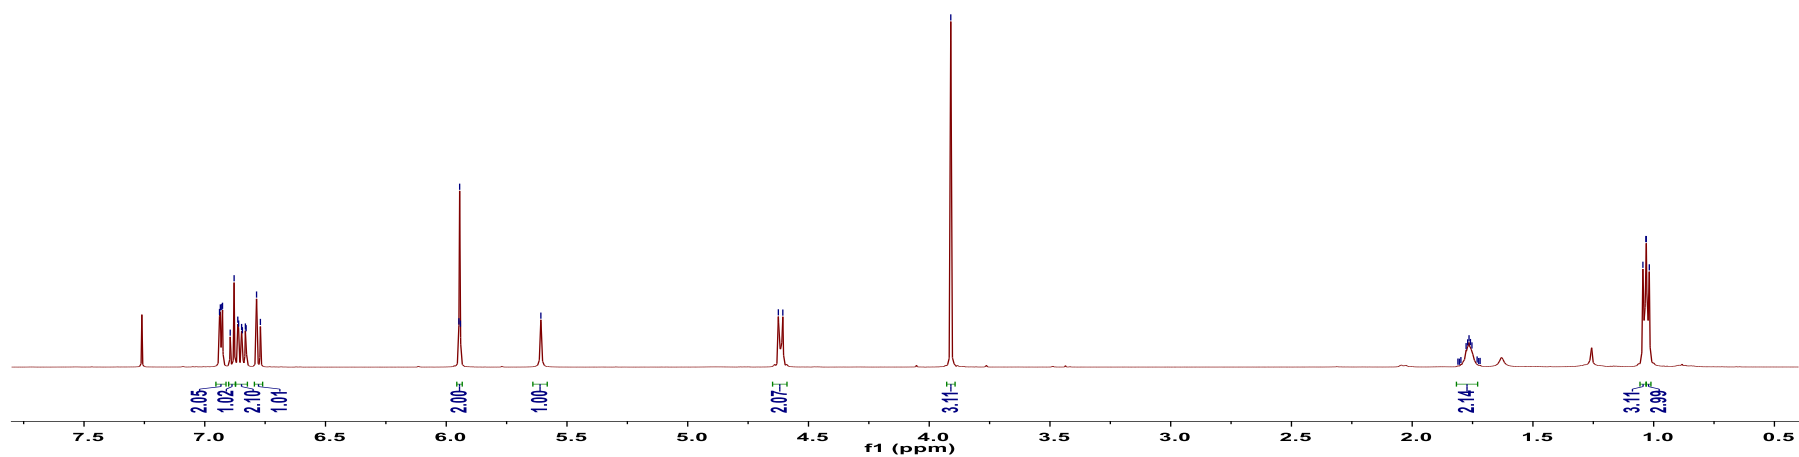

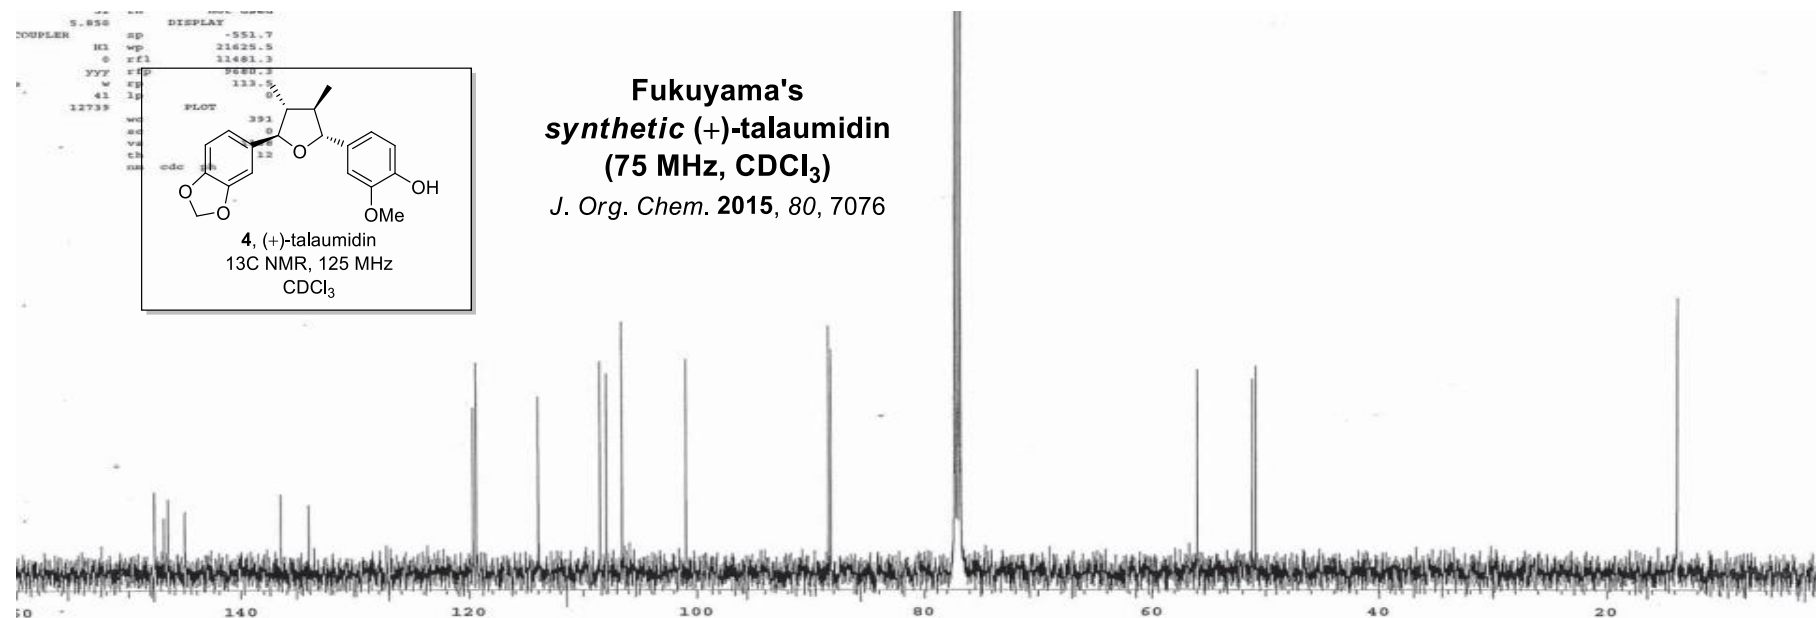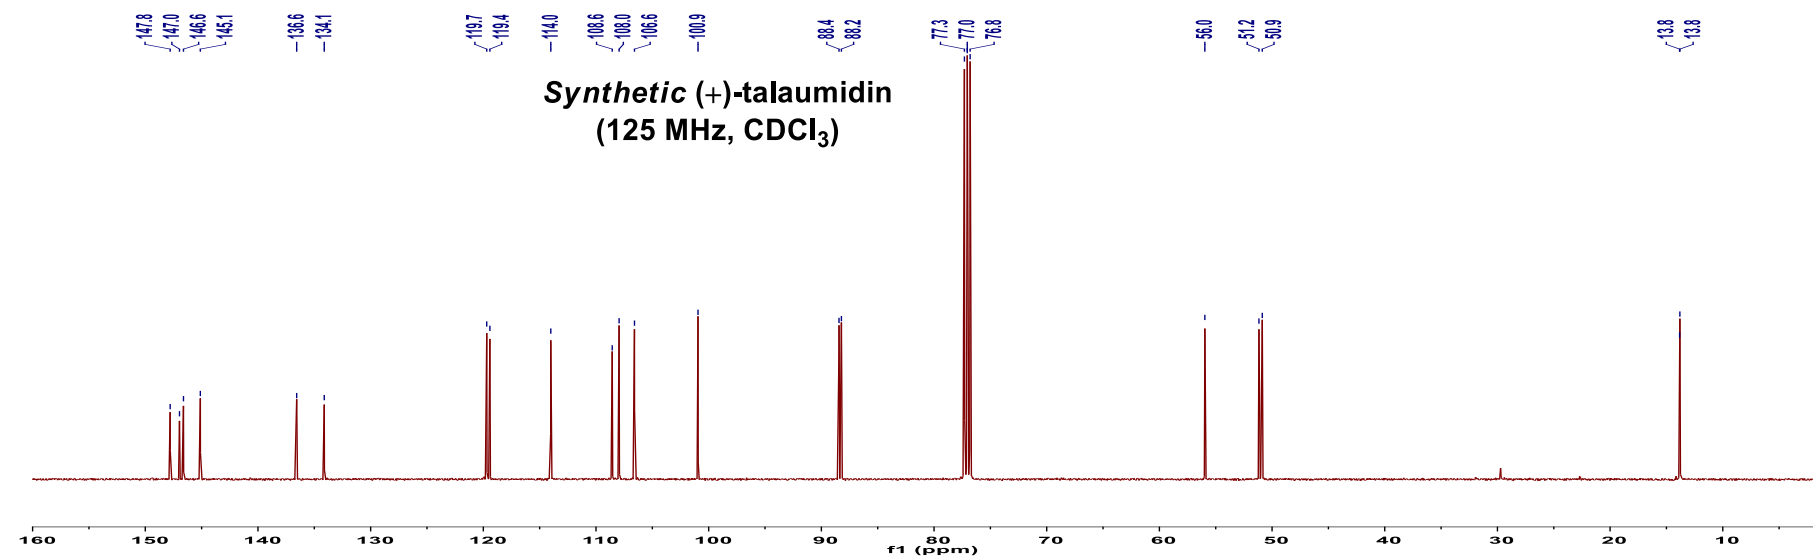

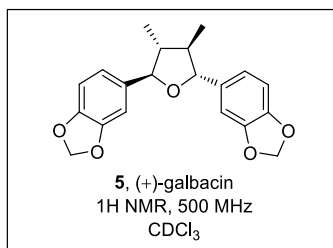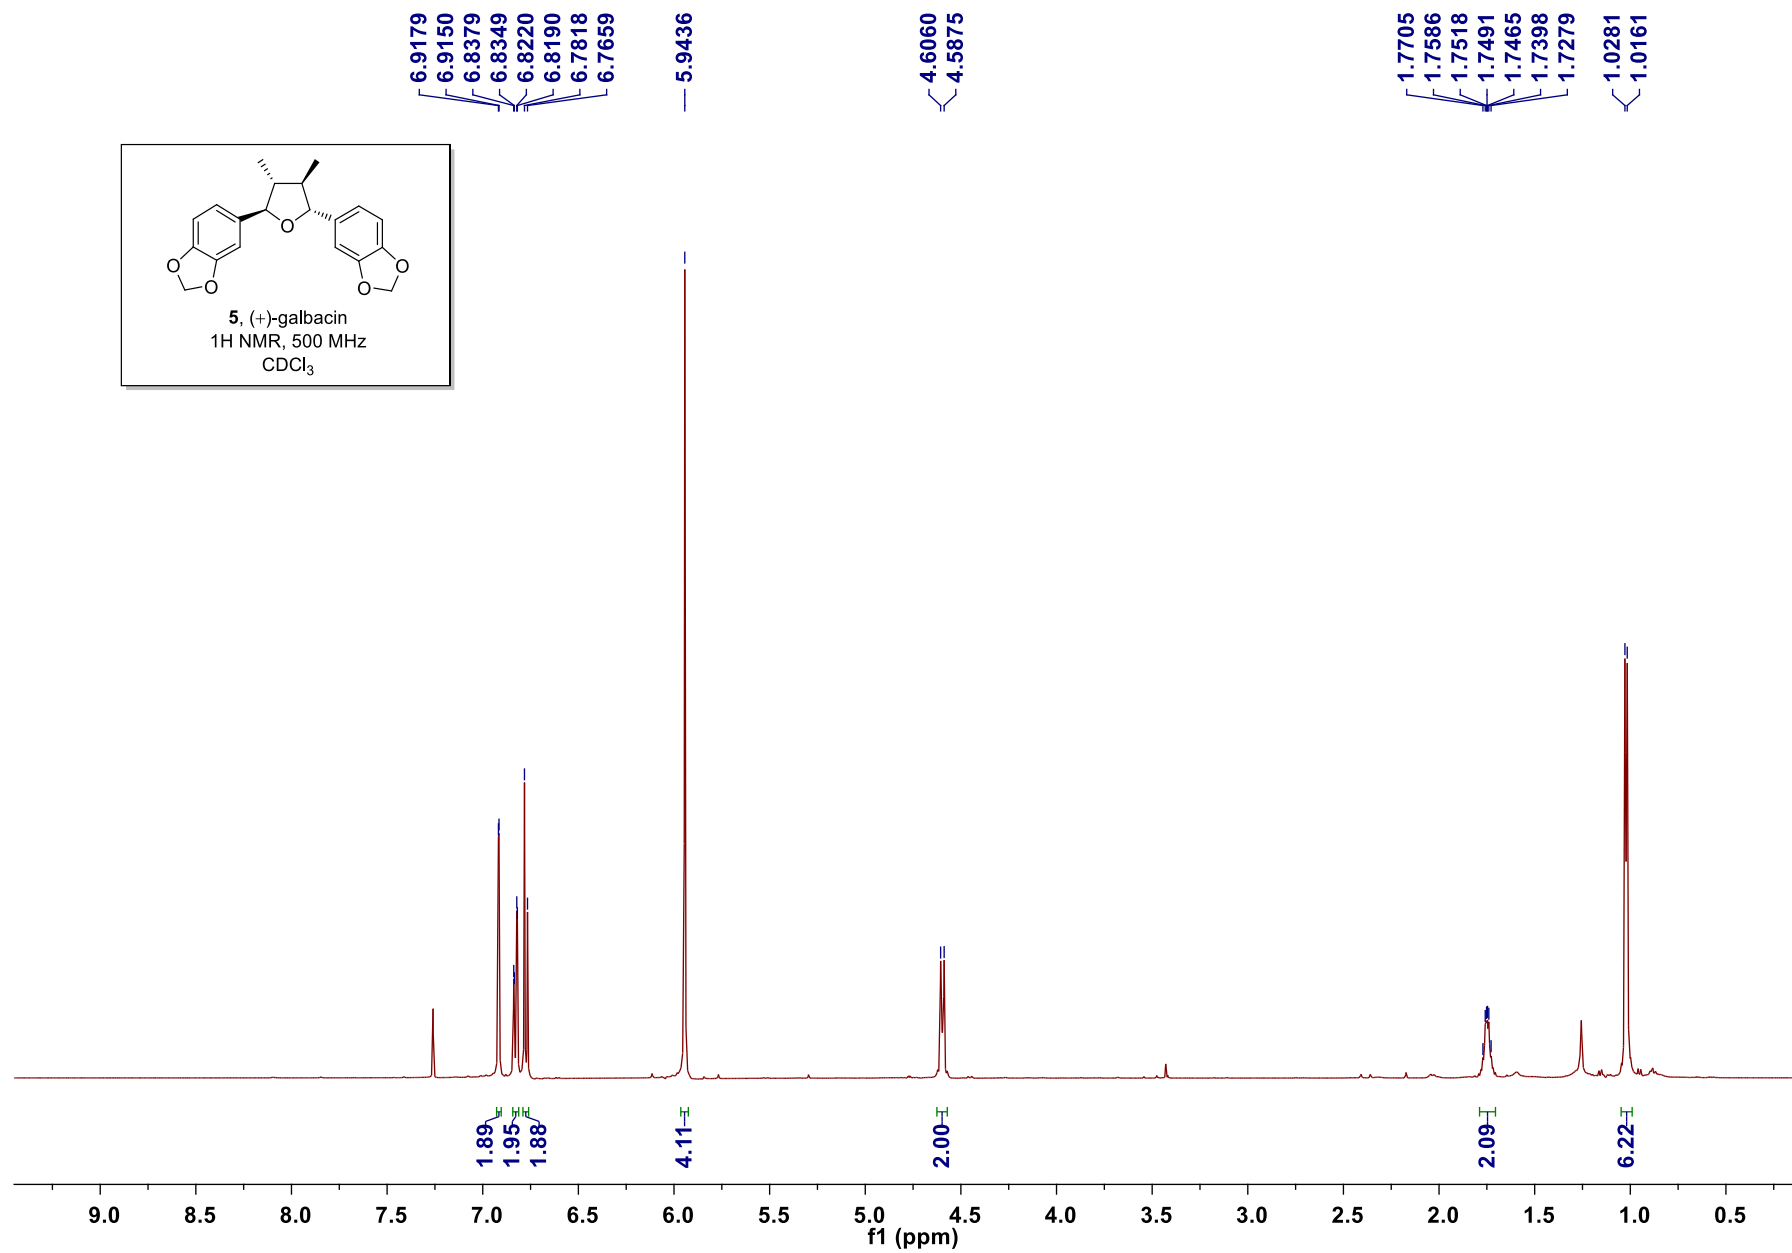



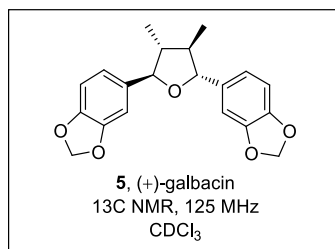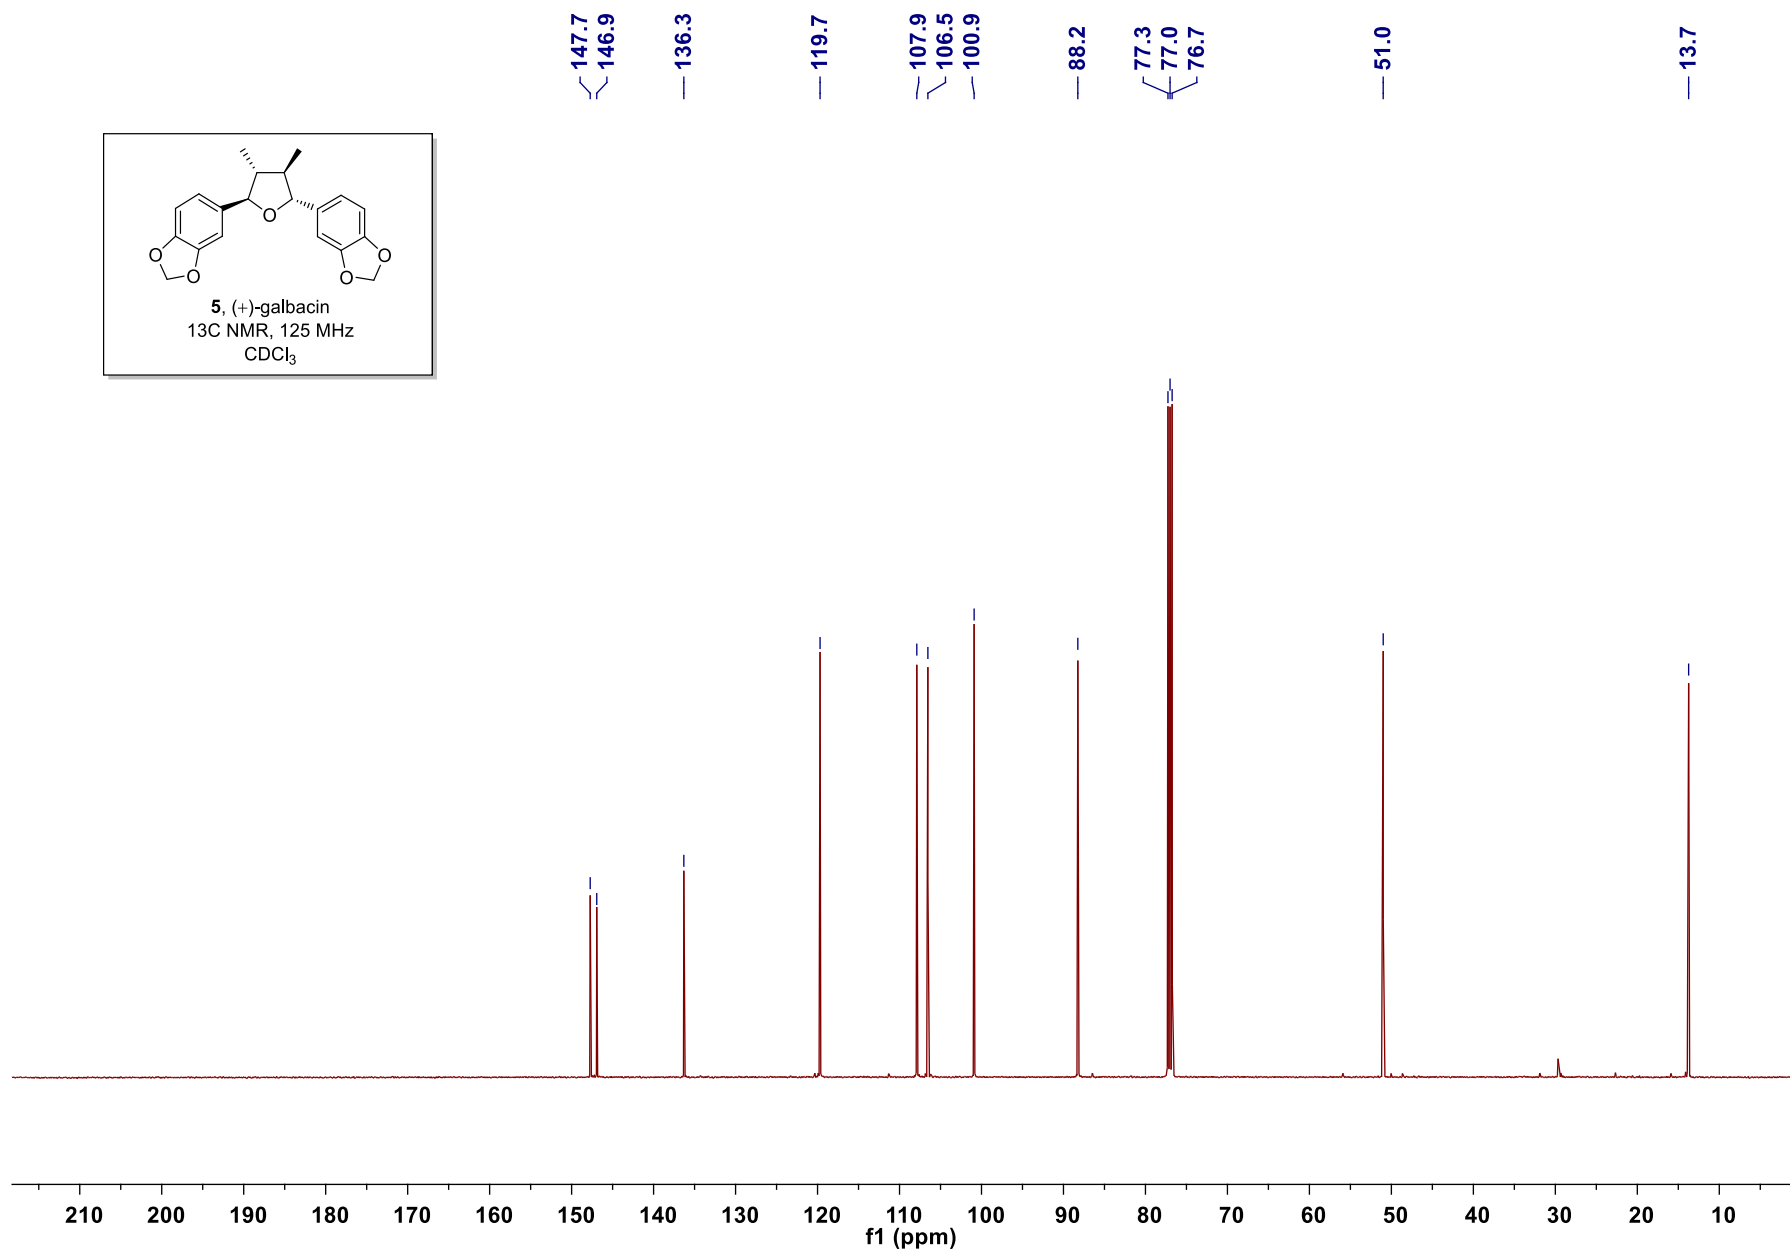

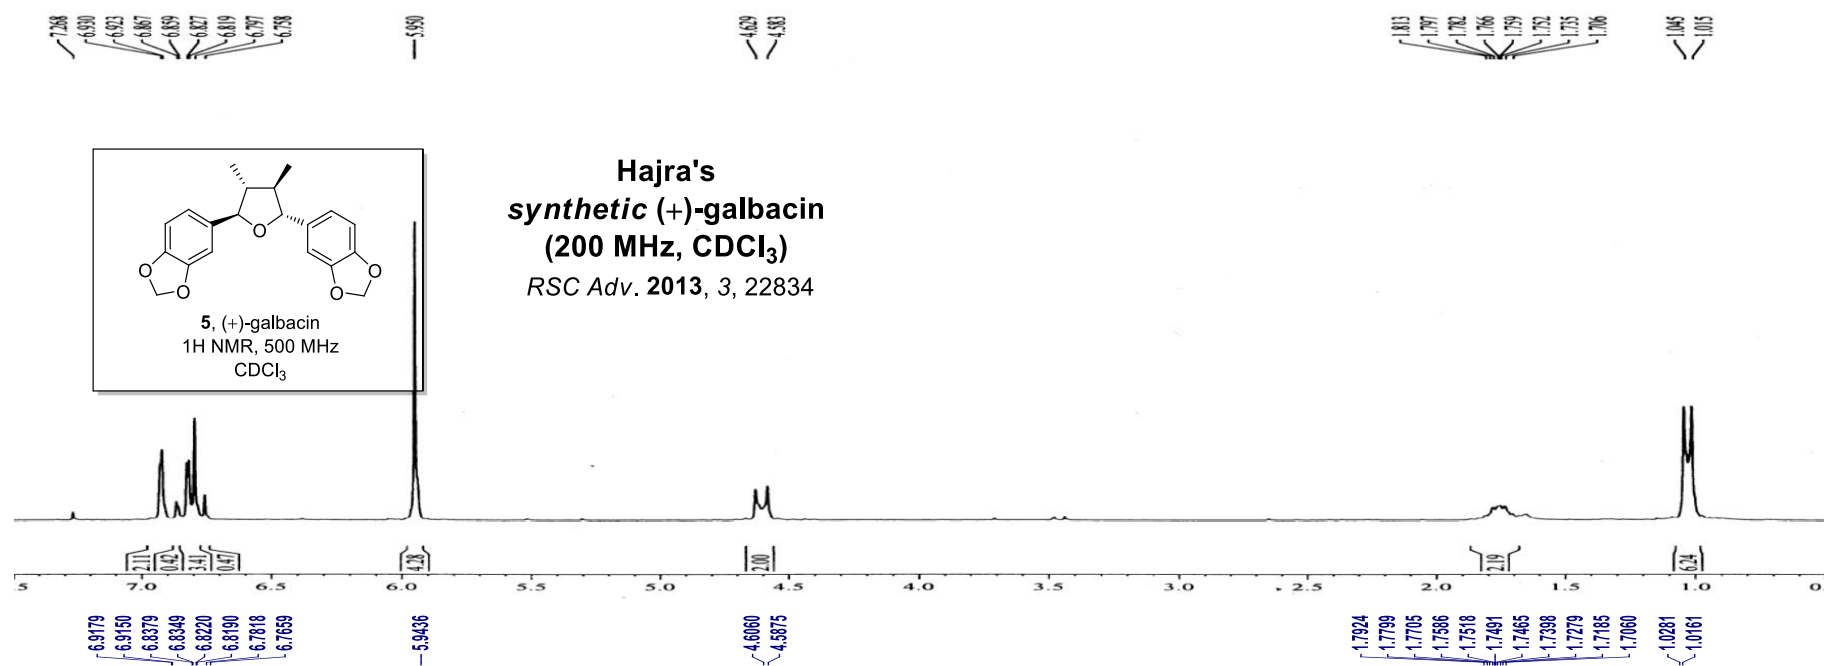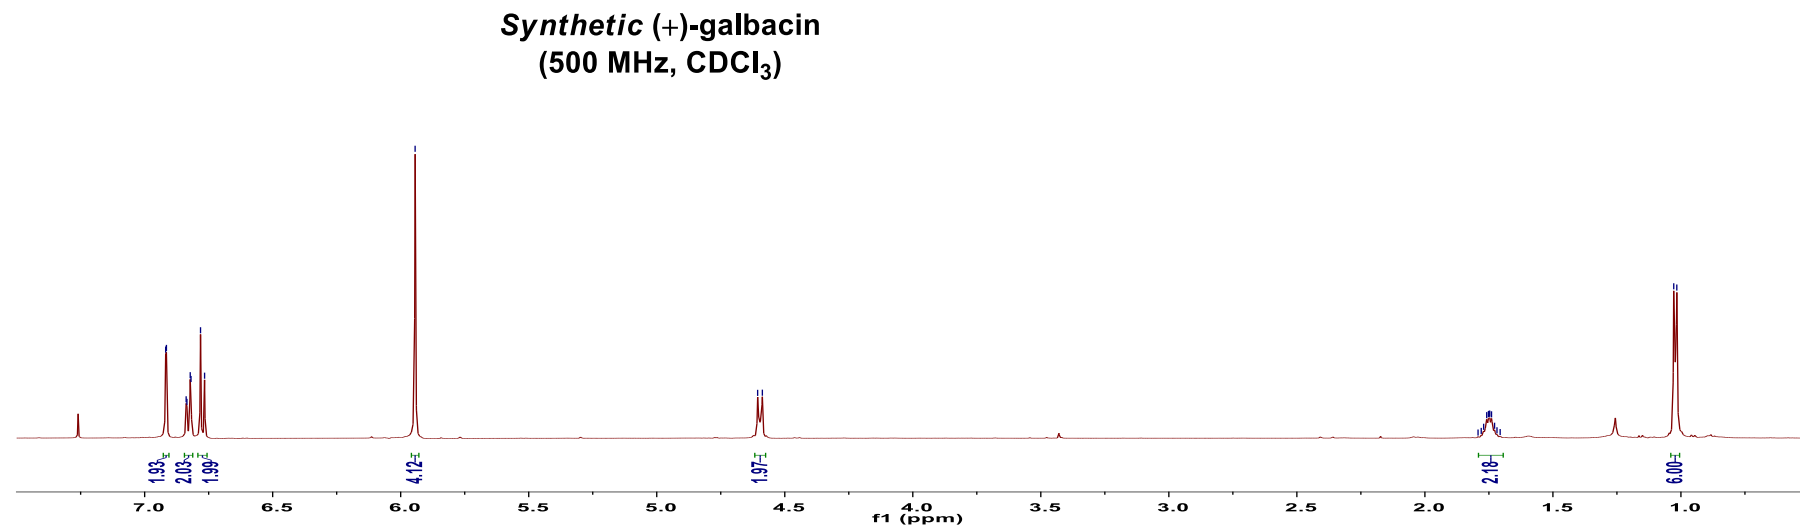

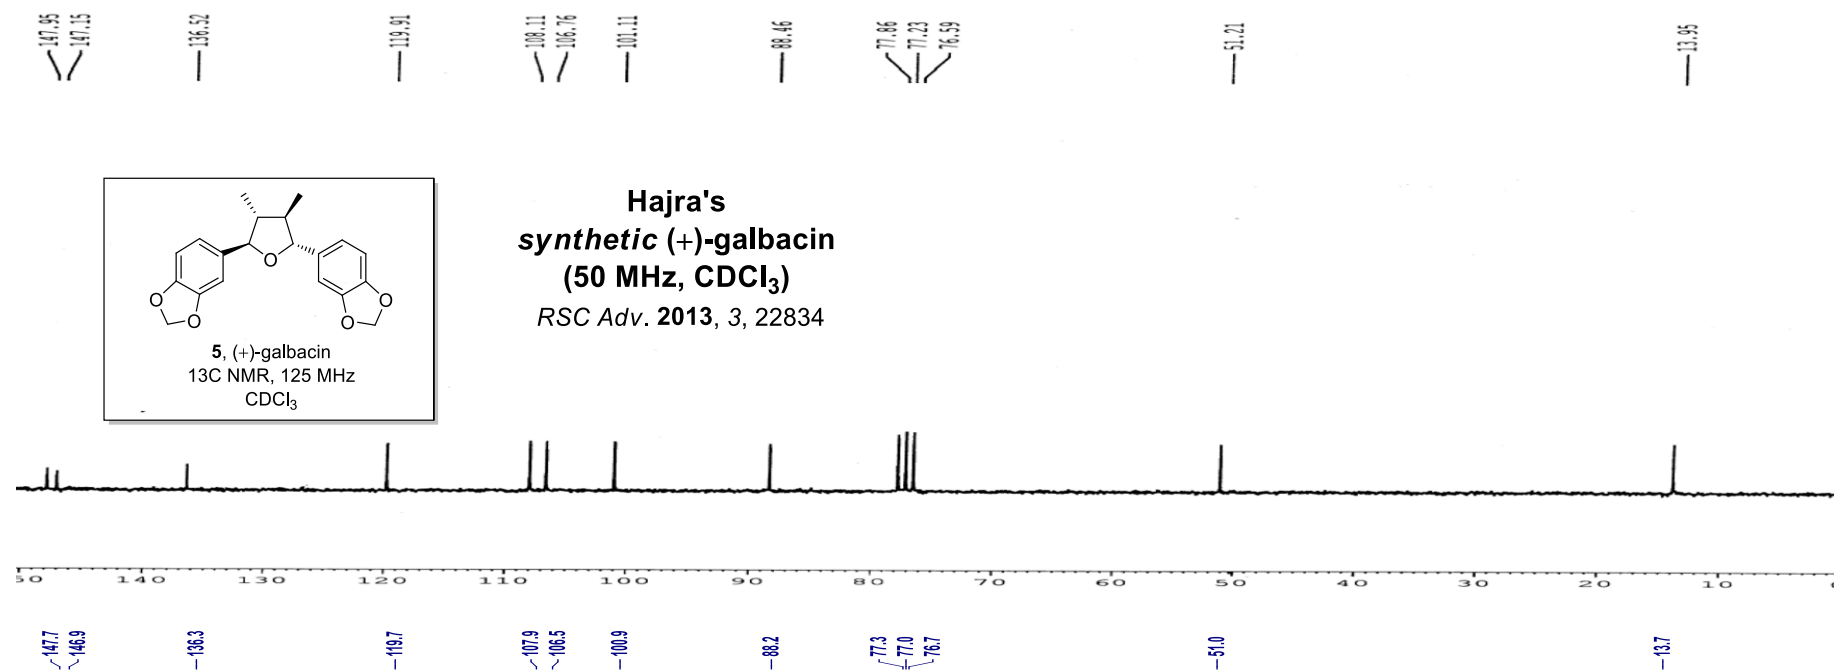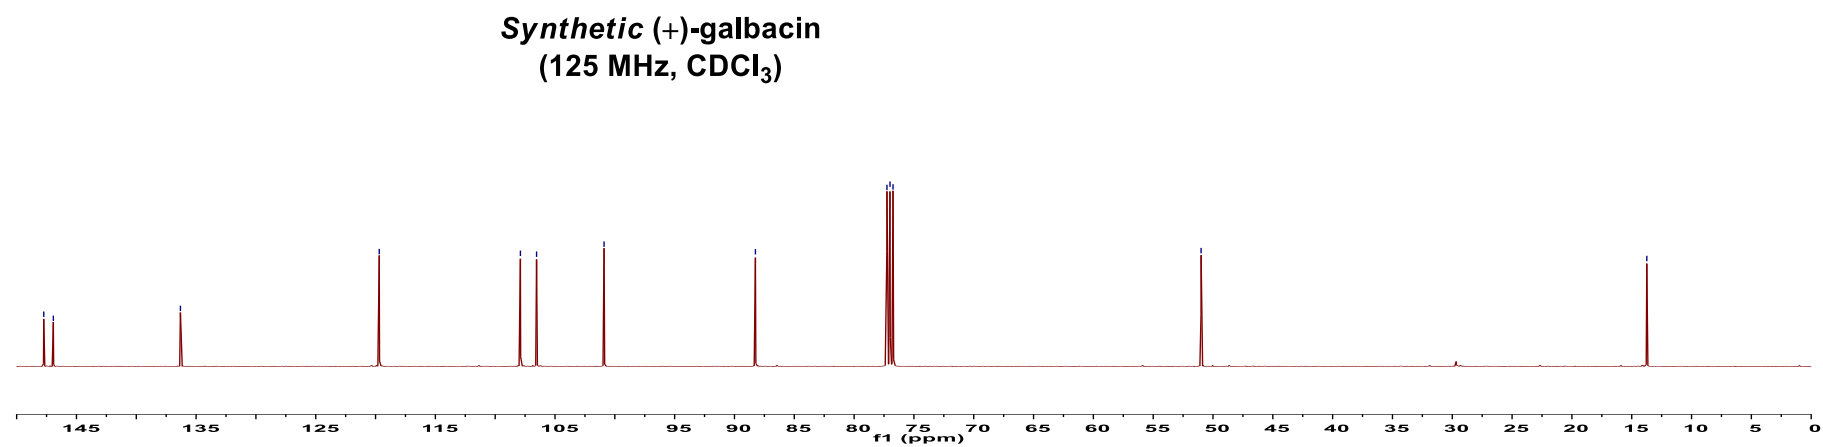

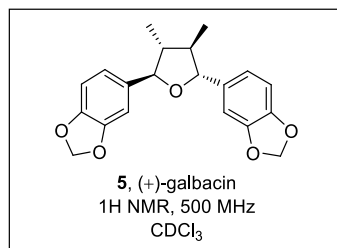

**Carreaux's**  
**synthetic (–)-galbacin**  
**(300 MHz, CDCl<sub>3</sub>)**  
*Org. Biomol. Chem.* **2018**, *16*, 1672

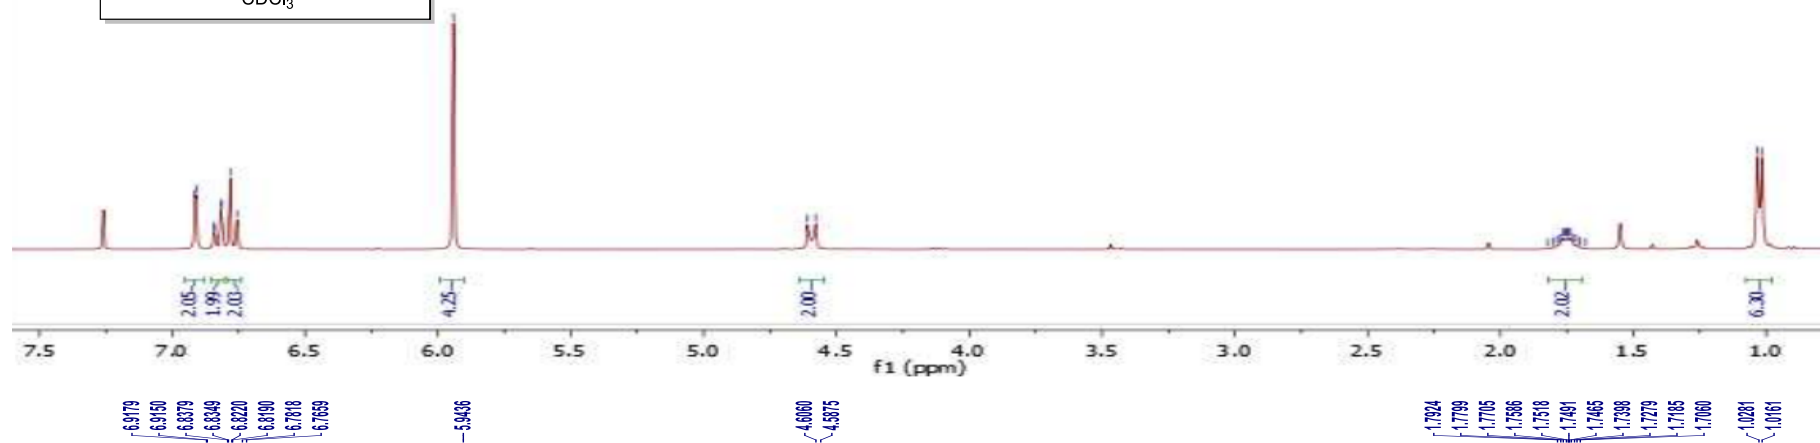

**Synthetic (+)-galbacin**  
**(125 MHz, CDCl<sub>3</sub>)**

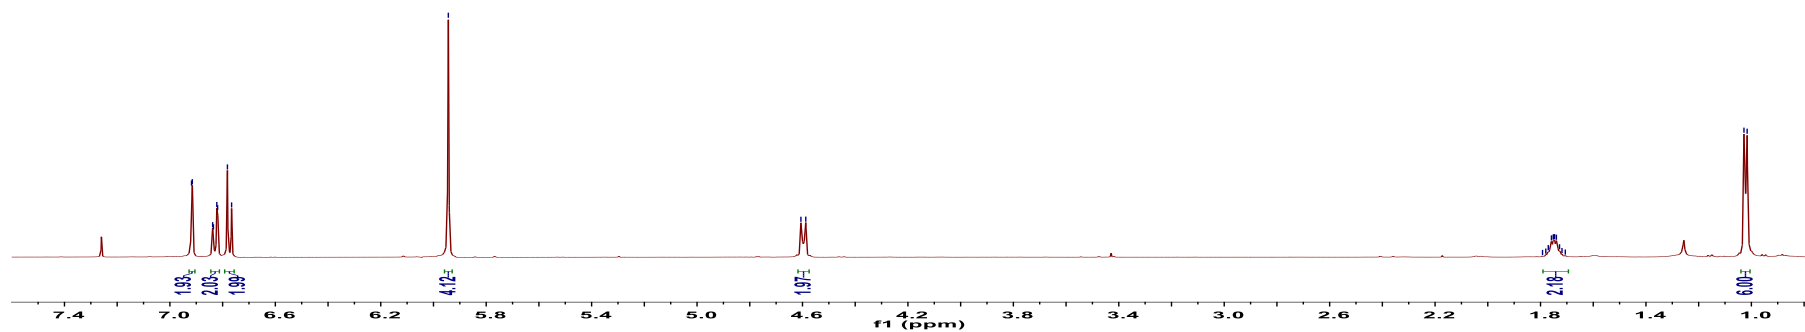

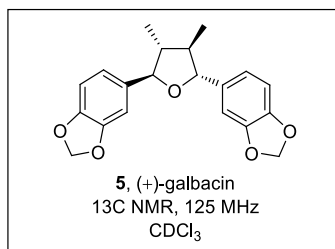

**Carreaux's  
 synthetic (-)-galbacin  
 (101 MHz, CDCl<sub>3</sub>)**  
*Org. Biomol. Chem.* **2018**, *16*, 1672

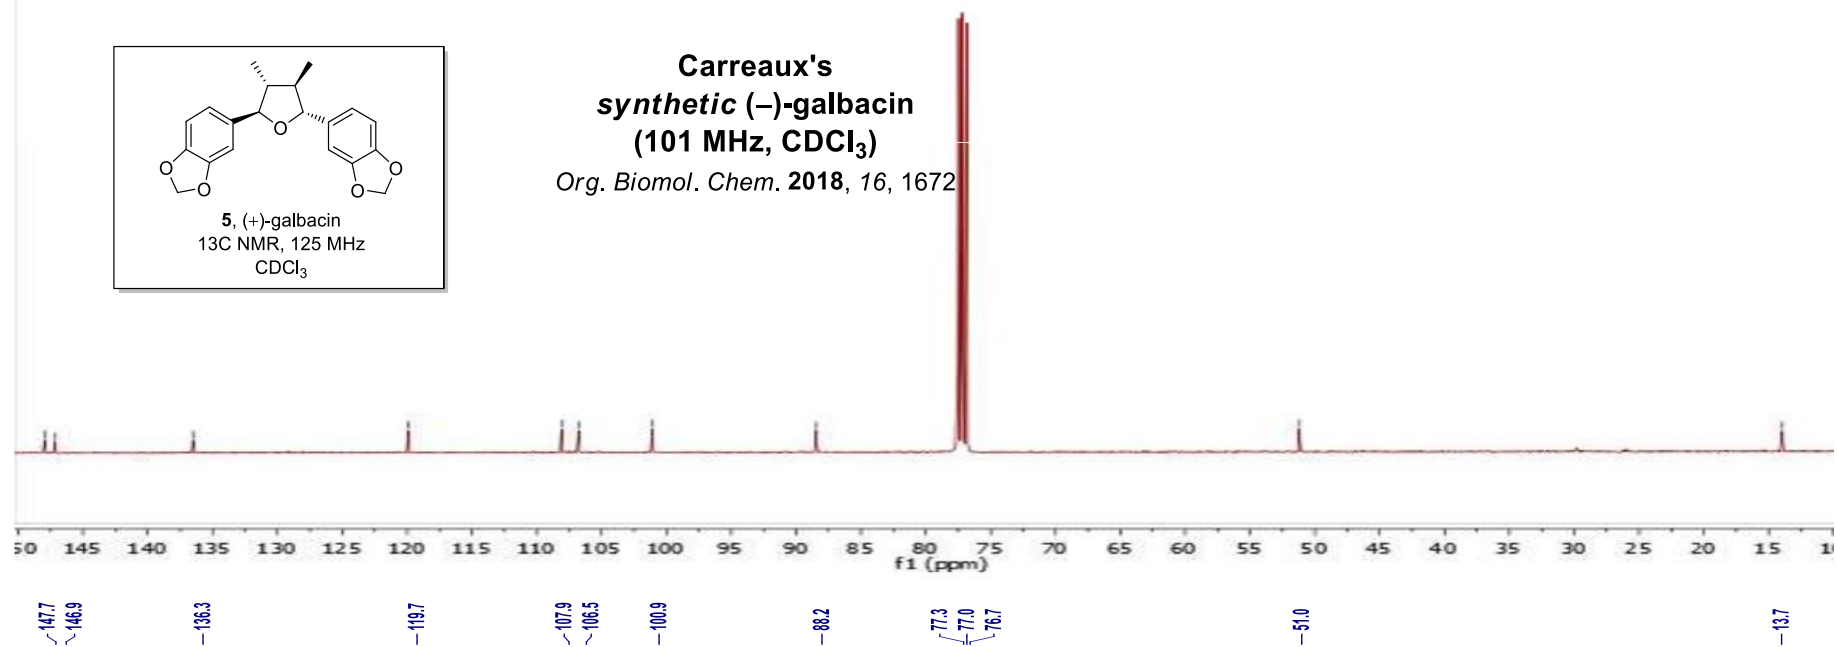

**Synthetic (+)-galbacin  
 (125 MHz, CDCl<sub>3</sub>)**

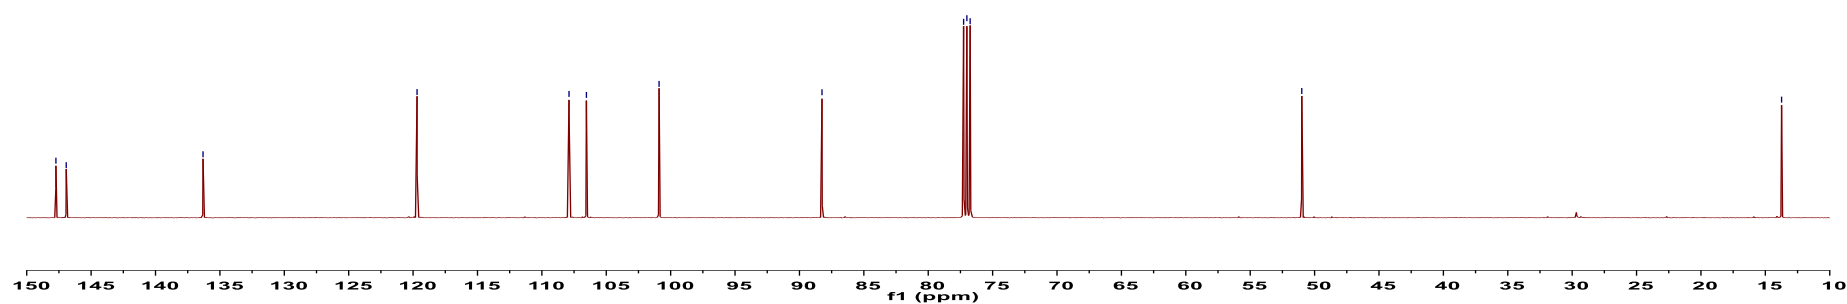

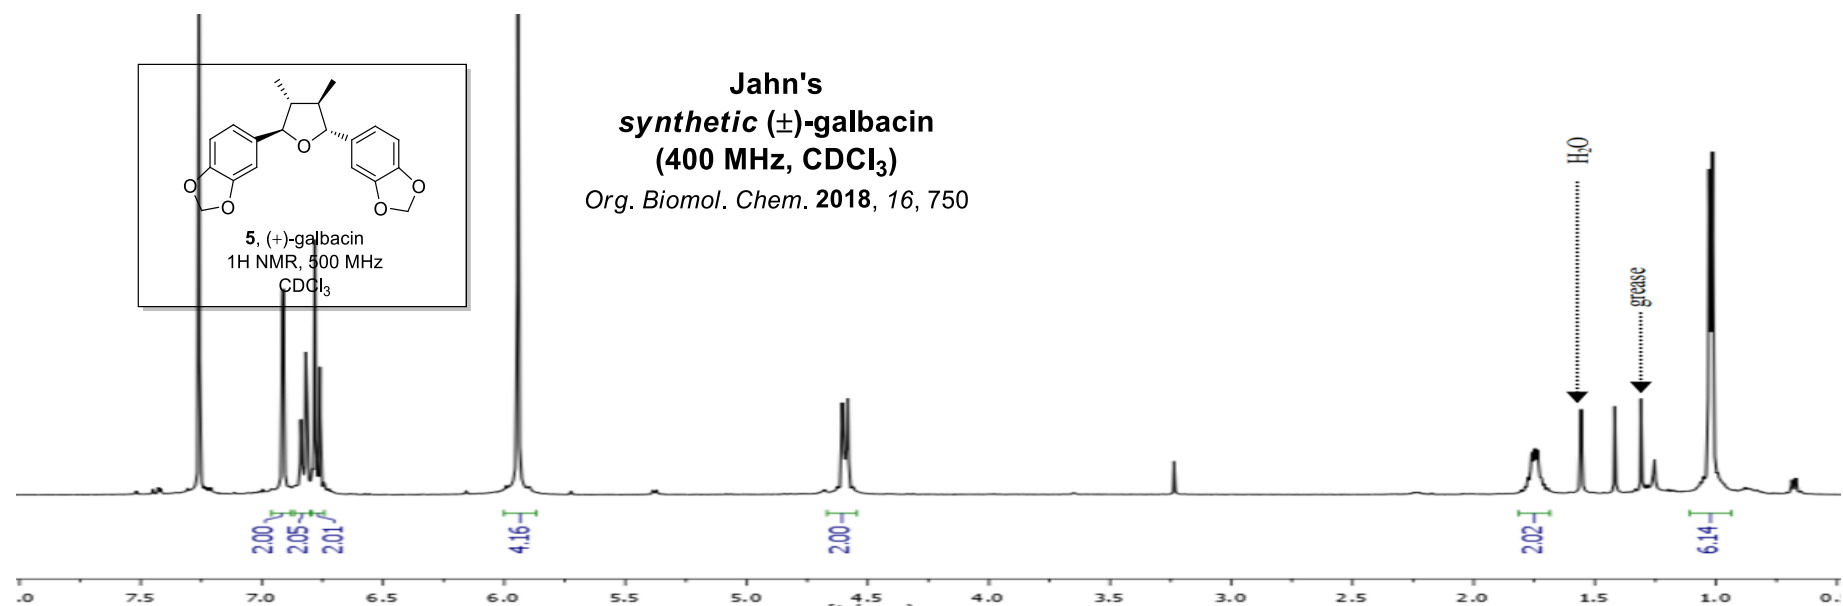

6.9179  
6.9150  
6.8379  
6.8349  
6.8220  
6.8190  
6.7818  
6.7659

5.9436

4.6060  
4.5875

1.7924  
1.7799  
1.7705  
1.7586  
1.7518  
1.7491  
1.7465  
1.7398  
1.7279  
1.7185  
1.7060  
1.0281  
1.0161

**Synthetic (+)-galbacin  
(500 MHz, CDCl<sub>3</sub>)**

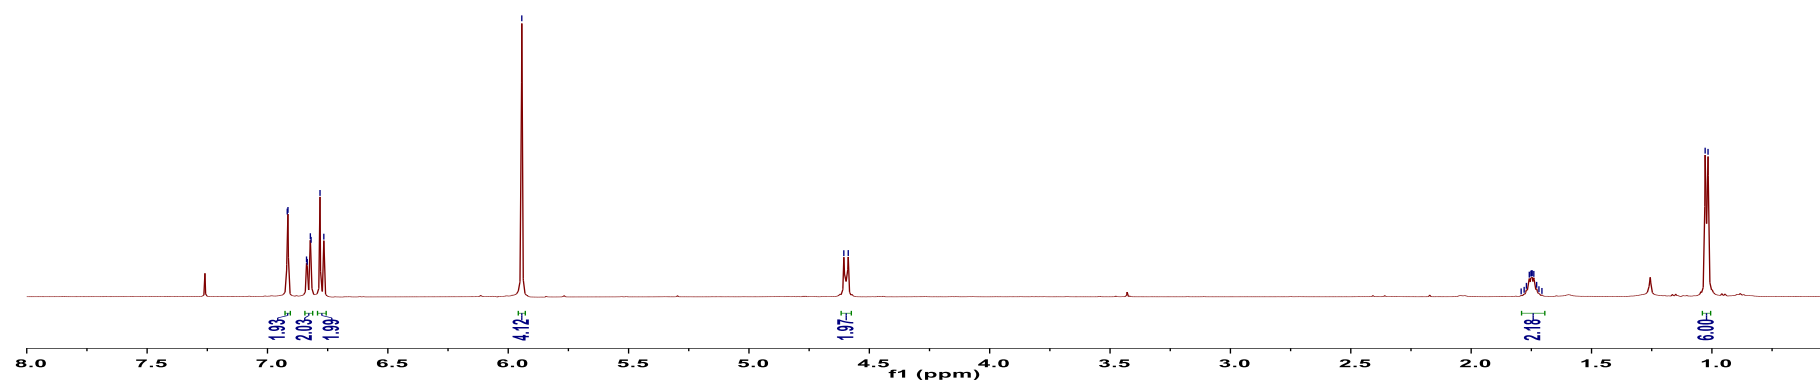

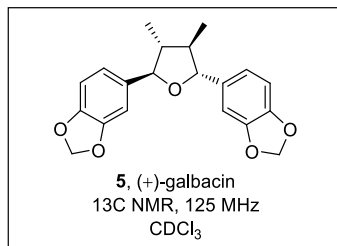

**Jahn's**  
**synthetic (±)-galbacin**  
 (100 MHz, CDCl<sub>3</sub>)  
*Org. Biomol. Chem.* **2018**, 16, 750

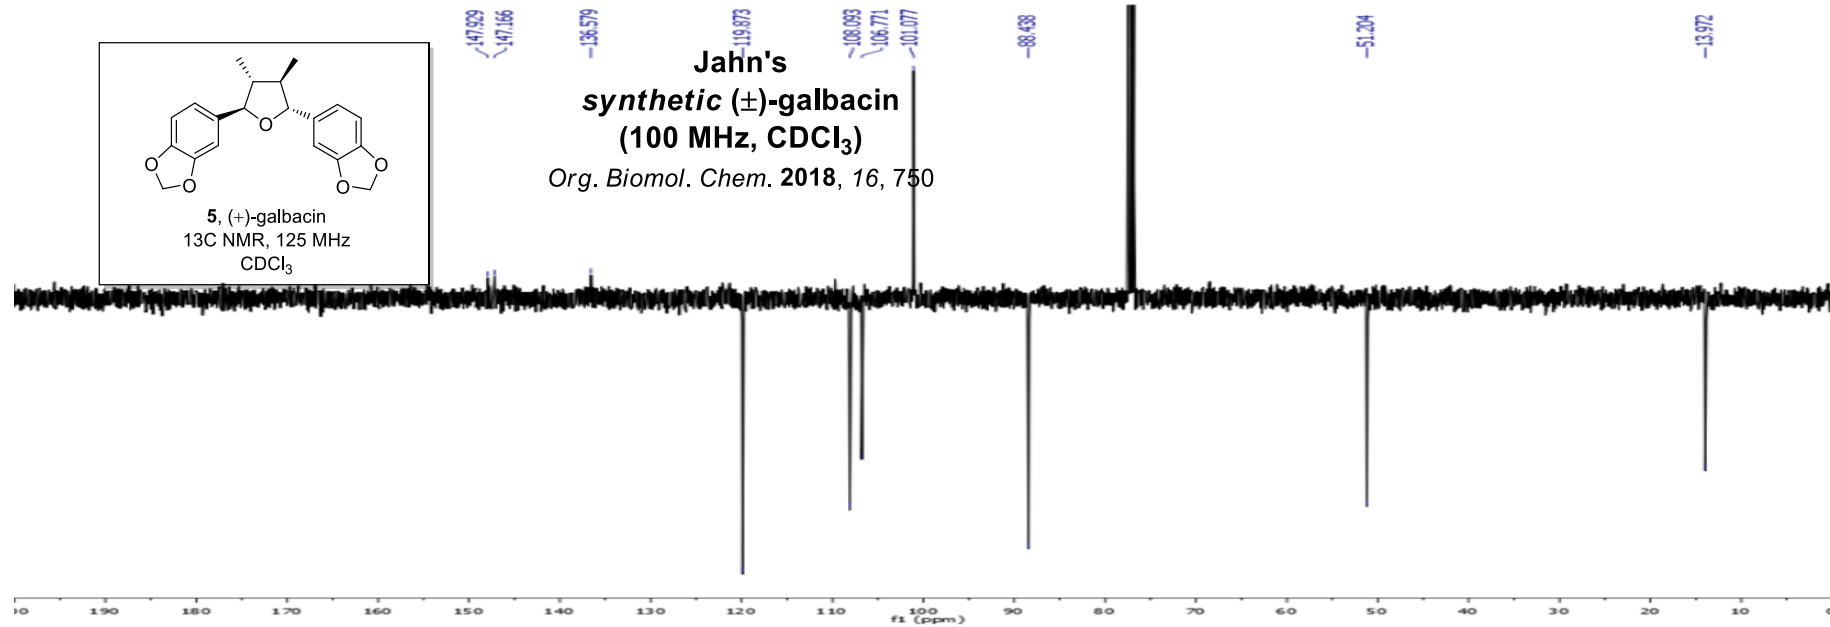

**Synthetic (+)-galbacin**  
 (125 MHz, CDCl<sub>3</sub>)

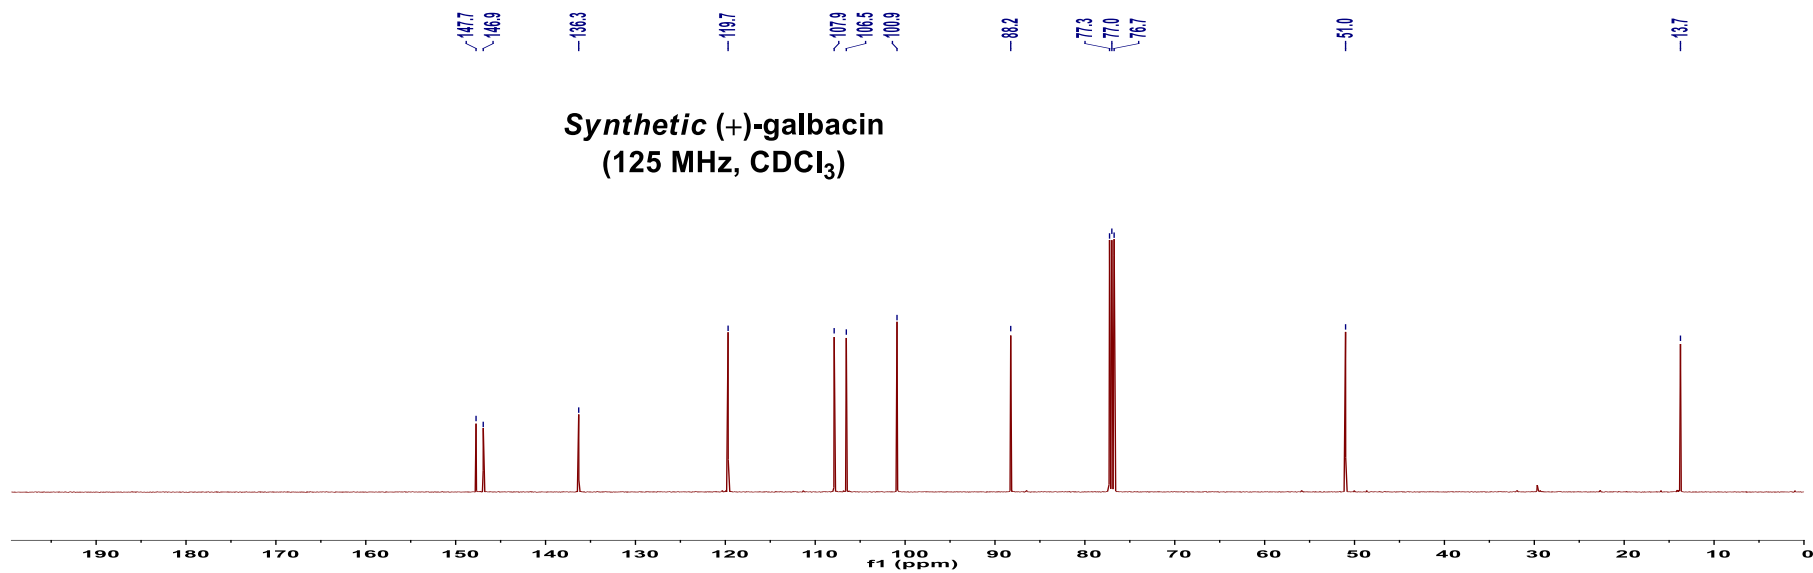

## 6. Reference

1. Harada, K.; Horiuchi, H.; Tanabe, K.; Carter, R.G.; Kubo, M.; Hioki, H.; Fukuyama, Y.; Esumi, T. Asymmetric synthesis of (–)-chicanine using a highly regioselective intramolecular Mitsunobu reaction and revision of its absolute configuration. *Tetrahedron Lett.* **2011**, *52*, 3005–3008.
2. Harada, K.; Kubo, M.; Horiuchi, H.; Ishii, A.; Esumi, T.; Hioki, H.; Fukuyama, Y. Systematic Asymmetric Synthesis of All Diastereomers of (–)-Talaumidin and Their Neurotrophic Activity. *J. Org. Chem.* **2015**, *80*, 7076–7088.
3. Kim, H.; Wooten, C.M.; Park, Y.; Hong, J. Stereoselective Synthesis of Tetrahydrofuran Lignans via BF<sub>3</sub>·OEt<sub>2</sub>-Promoted Reductive Deoxygenation/Epimerization of Cyclic Hemiketal: Synthesis of (–)-Odoratisol C, (–)-Futokadsurin A, (–)-Veraguensin, (+)-Fragransin A<sub>2</sub>, (+)-Galbelgin, and (+)-Talaumidin. *Org. Lett.* **2007**, *9*, 3965–3968.
4. Jagtap, P.R.; Cisarova, I.; Jahn, U. Bioinspired Total Synthesis of Tetrahydrofuran Lignans by Tandem Nucleophilic Addition/Redox Isomerization/Oxidative Coupling and Cycloetherification Reactions as Key Steps. *Org. Biomol. Chem.* **2018**, *16*, 750–755.
5. Jahn, U.; Rudakov, D. Tetrahydrofuran Lignans via Tandem Oxidative Anionic–Radical Processes or Reductive Radical Cyclizations. *Org. Lett.* **2006**, *8*, 4481–4484.
6. Rye, C.E.; Barker, D. Asymmetric Synthesis of (+)-Galbelgin, (–)-Kadangustin J, (–)-Cyclogalgravin and (–)-Pycnanthuligenes A and B, Three Structurally Distinct Lignan Classes, Using a Common Chiral Precursor. *J. Org. Chem.* **2011**, *76*, 6636–6648.
7. Hazra, S.; Hajra, S. A diastereoselective route to 2,5-diaryl-3,4-disubstituted tetrahydrofuran lignans: protection free synthesis of (+)-galbelgin and (+)-galbacin. *RSC Adv.* **2013**, *3*, 22834–22836.
8. Matcha, K.; Ghosh, S. A stereocontrolled approach for the synthesis of 2,5-diaryl-3,4-disubstituted furano lignans through a highly diastereoselective aldol condensation of an ester enolate with an α-chiral center: total syntheses of (–)-talaumidin and (–)-virgatusin. *Tetrahedron Lett.* **2008**, *49*, 3433–3436.
9. Henrion, S.; Macé, A.; Vallejos, M.M.; Roisnel, T.; Carboni, B.; Villalgordo, J.M.; Carreaux, F. Asymmetric synthesis of trans-4,5-disubstituted γ-butyrolactones involving a key allylboration step. First access to (–)-nicotlactone B and (–)-galbacin. *Org. Biomol. Chem.* **2018**, *16*, 1672.
